# Supplementary material for: Zirconocene-Catalyzed Dimerization of α-Olefins: DFT Modeling of the Zr-Al Binuclear Reaction Mechanism
Source: MDPI journal article supplement (doi:10.3390/molecules24193565), 2019-10-02
Supplement: s1 [file s1]

# Zirconocene-catalyzed dimerization of $\alpha$ -olefins: DFT modeling of the Zr-Al binuclear reaction mechanism

Ilya Nifant'ev<sup>1,2,\*</sup>, Alexander Vinogradov<sup>1</sup>, Alexey Vinogradov<sup>1</sup>, Stanislav Karchevsky<sup>3</sup> and Pavel Ivchenko<sup>1,2</sup>

<sup>1</sup> A.V. Topchiev Institute of Petrochemical Synthesis RAS, 29 Leninsky Pr., Moscow, Russia 119991; [ilnif@yahoo.com](mailto:ilnif@yahoo.com) (I.N.), [amvvin@mail.ru](mailto:amvvin@mail.ru) (Alexander V.), [vinasora@gmail.com](mailto:vinasora@gmail.com) (Alexey V.), [phpasha1@yandex.ru](mailto:phpasha1@yandex.ru) (P.I.)

<sup>2</sup> Chemistry Department, M.V. Lomonosov Moscow State University, 1 Leninskie Gory Str., Building 3, Moscow, Russia 119991; [inif@org.chem.msu.ru](mailto:inif@org.chem.msu.ru) (I.N.), [inpv@org.chem.msu.ru](mailto:inpv@org.chem.msu.ru) (P.I.)

<sup>3</sup> Joint-stock company "Institute of petroleum refining and petrochemistry", 12 Iniciativnaya Str., Ufa, Republic of Bashkortostan, Russia 450065; [st\\_karchevsky@mail.ru](mailto:st_karchevsky@mail.ru) (S.K.)

\* Correspondence: [ilnif@yahoo.com](mailto:ilnif@yahoo.com); Tel.: +7-495-939-4098 (I.N.)

## SUPPORTING INFORMATION

|                                                          |     |
|----------------------------------------------------------|-----|
| S1. DFT calculations                                     | 2   |
| S1.1. Olefins and organoaluminium compounds              | 2   |
| S1.2. Reaction profile without Zr–Al coordination        | 10  |
| S1.3. Me <sub>2</sub> AlH reaction profile               | 28  |
| S1.4. Me <sub>2</sub> AlCl reaction profile              | 41  |
| S1.5. Me <sub>3</sub> Al reaction profile                | 54  |
| S1.6. <sup>i</sup> Bu <sub>2</sub> AlH reaction profile  | 67  |
| S1.7. <sup>i</sup> Bu <sub>2</sub> AlCl reaction profile | 84  |
| S1.8. <sup>i</sup> Bu <sub>2</sub> AlMe reaction profile | 101 |
| S1.9. Interaction with H <sub>2</sub>                    | 119 |
| S1.10. Transition states search and proof (IRC)          | 121 |
| S2. Oligomerization experiments                          | 122 |

## S1. DFT calculations data: molecular structures, energies and cartesian coordinates

### S1.1. Olefins and organoaluminium compounds

#### C3 Propylene

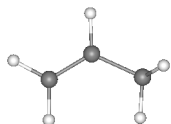

|                                             |                             |
|---------------------------------------------|-----------------------------|
| Zero-point vibrational energy               | 211398.7 (Joules/Mol)       |
|                                             | 50.52549 (Kcal/Mol)         |
| Zero-point correction                       | 0.080517 (Hartree/Particle) |
| Thermal correction to Energy                | 0.084591                    |
| Thermal correction to Enthalpy              | 0.085535                    |
| Thermal correction to Gibbs Free Energy     | 0.055526                    |
| Sum of electronic and zero-point Energies   | -117.762918                 |
| Sum of electronic and Thermal Energies      | -117.758845                 |
| Sum of electronic and Thermal Enthalpies    | -117.757900                 |
| Sum of electronic and Thermal Free Energies | -117.787910                 |

|   |             |             |             | cartesian |             |             |             |
|---|-------------|-------------|-------------|-----------|-------------|-------------|-------------|
| 1 | -0.27033332 | 1.58850002  | 0.00021111  | 1         | 1.70376670  | 0.18960002  | -0.88008893 |
| 6 | -0.23303331 | 0.49990001  | 0.00011111  | 1         | 1.70386672  | 0.18940002  | 0.88001108  |
| 6 | -1.37853336 | -0.18249999 | 0.00001111  | 1         | -1.38873339 | -1.27020001 | -0.00008889 |
| 6 | 1.13336670  | -0.12299998 | -0.00008889 | 1         | -2.34013319 | 0.32170001  | 0.00011111  |
| 1 | 1.06976664  | -1.21340001 | -0.00018889 |           |             |             |             |

#### C6 2-methylpent-1-ene

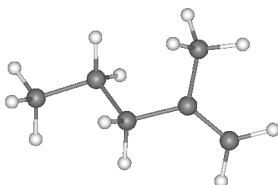

|                                         |                             |
|-----------------------------------------|-----------------------------|
| Zero-point vibrational energy           | 437755.2 (Joules/Mol)       |
|                                         | 104.62601 (Kcal/Mol)        |
| Zero-point correction                   | 0.166732 (Hartree/Particle) |
| Thermal correction to Energy            | 0.174743                    |
| Thermal correction to Enthalpy          | 0.175687                    |
| Thermal correction to Gibbs Free Energy | 0.133949                    |

|                                             |             |
|---------------------------------------------|-------------|
| Sum of electronic and zero-point Energies   | -235.567243 |
| Sum of electronic and Thermal Energies      | -235.559233 |
| Sum of electronic and Thermal Enthalpies    | -235.558288 |
| Sum of electronic and Thermal Free Energies | -235.600026 |

| cartesian |             |             |             |   |             |             |             |
|-----------|-------------|-------------|-------------|---|-------------|-------------|-------------|
| 6         | 2.11586118  | -1.19247782 | 0.22433333  | 6 | -1.17973888 | 0.21752222  | 0.40563333  |
| 6         | 1.28416109  | -0.19617778 | -0.09466667 | 1 | -0.29373884 | -0.08927779 | -1.53176665 |
| 6         | 1.72116113  | 1.24642217  | -0.05856667 | 1 | -0.32783884 | -1.53517783 | -0.52496666 |
| 6         | -0.14513884 | -0.45527780 | -0.50626665 | 6 | -2.61013889 | -0.14387779 | 0.00683333  |
| 1         | 1.79176116  | -2.22987771 | 0.20183334  | 1 | -1.05713880 | 1.30512214  | 0.36623335  |
| 1         | 3.14576125  | -1.00127780 | 0.51553333  | 1 | -0.99213886 | -0.08297779 | 1.44253337  |
| 1         | 1.46976113  | 1.75102222  | -0.99796665 | 1 | -3.34213877 | 0.34442219  | 0.65543336  |
| 1         | 1.21206117  | 1.79022217  | 0.74383336  | 1 | -2.77293897 | -1.22397780 | 0.07083333  |
| 1         | 2.79746103  | 1.33322215  | 0.10443333  | 1 | -2.81703877 | 0.16242221  | -1.02326667 |

### Me<sub>2</sub>AlH

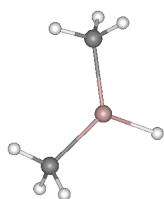

|                                             |                             |
|---------------------------------------------|-----------------------------|
| Zero-point vibrational energy               | 206187.7 (Joules/Mol)       |
|                                             | 49.28004 (Kcal/Mol)         |
| Zero-point correction                       | 0.078533 (Hartree/Particle) |
| Thermal correction to Energy                | 0.084839                    |
| Thermal correction to Enthalpy              | 0.085783                    |
| Thermal correction to Gibbs Free Energy     | 0.049544                    |
| Sum of electronic and zero-point Energies   | -322.675915                 |
| Sum of electronic and Thermal Energies      | -322.669609                 |
| Sum of electronic and Thermal Enthalpies    | -322.668665                 |
| Sum of electronic and Thermal Free Energies | -322.704904                 |

| cartesian |             |             |             |   |             |             |             |
|-----------|-------------|-------------|-------------|---|-------------|-------------|-------------|
| 13        | 0.00000995  | 0.69409001  | 0.00005000  | 1 | -2.31759000 | 0.04249001  | -0.87424999 |
| 6         | -1.71979010 | -0.24191001 | 0.00005000  | 1 | 2.31751013  | 0.04159001  | -0.87465000 |
| 6         | 1.71980989  | -0.24191001 | 0.00005000  | 1 | 2.31810999  | 0.04289000  | 0.87395000  |
| 1         | -1.62759006 | -1.33160996 | -0.00025000 | 1 | 1.62750995  | -1.33160996 | 0.00085000  |
| 1         | -2.31788993 | 0.04209000  | 0.87424999  | 1 | -0.00009005 | 2.28389001  | -0.00005000 |

**Me<sub>2</sub>AlF**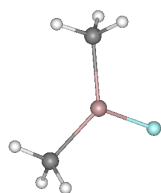

|                                             |                             |
|---------------------------------------------|-----------------------------|
| Zero-point vibrational energy               | 195987.5 (Joules/Mol)       |
|                                             | 46.84214 (Kcal/Mol)         |
| Zero-point correction                       | 0.074648 (Hartree/Particle) |
| Thermal correction to Energy                | 0.081673                    |
| Thermal correction to Enthalpy              | 0.082617                    |
| Thermal correction to Gibbs Free Energy     | 0.043727                    |
| Sum of electronic and zero-point Energies   | -422.008060                 |
| Sum of electronic and Thermal Energies      | -422.001034                 |
| Sum of electronic and Thermal Enthalpies    | -422.000090                 |
| Sum of electronic and Thermal Free Energies | -422.038981                 |

cartesian

|    |             |             |             |   |             |             |             |
|----|-------------|-------------|-------------|---|-------------|-------------|-------------|
| 9  | -0.00026001 | 2.27294993  | -0.00003000 | 1 | -2.33186007 | 0.07445005  | -0.87582999 |
| 13 | -0.00006001 | 0.58705002  | -0.00003000 | 1 | -1.71665990 | -1.33574986 | -0.00043000 |
| 6  | -1.75565994 | -0.24314994 | -0.00003000 | 1 | 2.33153987  | 0.07435006  | 0.87617004  |
| 6  | 1.75574005  | -0.24284995 | -0.00003000 | 1 | 1.71684003  | -1.33544993 | -0.00013000 |
| 1  | -2.33156013 | 0.07385004  | 0.87617004  | 1 | 2.33193994  | 0.07455003  | -0.87582999 |

**Me<sub>2</sub>AlCl**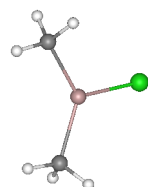

|                                             |                             |
|---------------------------------------------|-----------------------------|
| Zero-point vibrational energy               | 193594.6 (Joules/Mol)       |
|                                             | 46.27022 (Kcal/Mol)         |
| Zero-point correction                       | 0.073736 (Hartree/Particle) |
| Thermal correction to Energy                | 0.081041                    |
| Thermal correction to Enthalpy              | 0.081985                    |
| Thermal correction to Gibbs Free Energy     | 0.041705                    |
| Sum of electronic and zero-point Energies   | -782.313017                 |
| Sum of electronic and Thermal Energies      | -782.305712                 |
| Sum of electronic and Thermal Enthalpies    | -782.304768                 |
| Sum of electronic and Thermal Free Energies | -782.345048                 |

| cartesian |             |             |            |   |             |             |             |
|-----------|-------------|-------------|------------|---|-------------|-------------|-------------|
| 17        | -2.68446016 | -0.00012997 | 0.00012000 | 1 | -0.02626008 | -2.33113003 | 0.87361997  |
| 13        | -0.55946004 | -0.00002997 | 0.00052000 | 1 | -0.01906008 | -2.32693005 | -0.87867999 |
| 6         | 0.28773999  | -1.74942994 | 0.00012000 | 1 | -0.01836008 | 2.32646990  | -0.87927997 |
| 6         | 0.28753996  | 1.74947011  | 0.00022000 | 1 | -0.02736008 | 2.33156991  | 0.87301999  |
| 1         | 1.37994003  | -1.69572997 | 0.00462000 | 1 | 1.37974000  | 1.69587004  | 0.00572000  |

### Me<sub>3</sub>Al

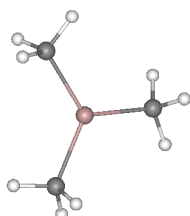

|                                             |                             |
|---------------------------------------------|-----------------------------|
| Zero-point vibrational energy               | 281420.0 (Joules/Mol)       |
|                                             | 67.26100 (Kcal/Mol)         |
| Zero-point correction                       | 0.107187 (Hartree/Particle) |
| Thermal correction to Energy                | 0.114008                    |
| Thermal correction to Enthalpy              | 0.114952                    |
| Thermal correction to Gibbs Free Energy     | 0.076672                    |
| Sum of electronic and zero-point Energies   | -361.960633                 |
| Sum of electronic and Thermal Energies      | -361.953812                 |
| Sum of electronic and Thermal Enthalpies    | -361.952868                 |
| Sum of electronic and Thermal Free Energies | -361.991148                 |

| cartesian |             |             |             |   |             |             |             |
|-----------|-------------|-------------|-------------|---|-------------|-------------|-------------|
| 13        | 0.00673848  | -0.00203843 | 0.01049999  | 1 | -1.73296154 | 1.79556155  | 0.64690000  |
| 6         | 1.96193850  | -0.15483843 | 0.00679999  | 1 | -0.17346153 | 2.57096148  | 0.32240000  |
| 6         | -0.84406149 | 1.76556158  | 0.00699999  | 6 | -1.11116147 | -1.61333847 | -0.00300001 |
| 1         | 2.43583846  | 0.58226156  | 0.66439998  | 1 | -1.29386151 | -1.95633841 | 1.02420008  |
| 1         | 2.31593847  | -1.14763844 | 0.30170000  | 1 | -0.63736153 | -2.45083833 | -0.52580005 |
| 1         | 2.35833836  | 0.03676157  | -0.99900001 | 1 | -2.09526157 | -1.44513845 | -0.45260000 |
| 1         | -1.19066155 | 2.01906157  | -1.00349998 |   |             |             |             |

### <sup>i</sup>Bu<sub>2</sub>AlH

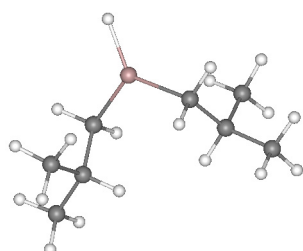

|                                             |                             |
|---------------------------------------------|-----------------------------|
| Zero-point vibrational energy               | 660384.6 (Joules/Mol)       |
|                                             | 157.83571 (Kcal/Mol)        |
| Zero-point correction                       | 0.251527 (Hartree/Particle) |
| Thermal correction to Energy                | 0.265239                    |
| Thermal correction to Enthalpy              | 0.266183                    |
| Thermal correction to Gibbs Free Energy     | 0.210572                    |
| Sum of electronic and zero-point Energies   | -558.270078                 |
| Sum of electronic and Thermal Energies      | -558.256366                 |
| Sum of electronic and Thermal Enthalpies    | -558.255422                 |
| Sum of electronic and Thermal Free Energies | -558.311033                 |

| cartesian |             |             |             |   |             |             |             |  |  |  |  |
|-----------|-------------|-------------|-------------|---|-------------|-------------|-------------|--|--|--|--|
| 13        | -0.00905002 | 1.78803933  | 0.04104284  | 1 | 3.35724998  | 0.96273929  | 1.08924282  |  |  |  |  |
| 6         | 1.42435002  | 0.79663926  | -0.87575716 | 1 | 3.43794990  | -1.97056055 | -0.11415716 |  |  |  |  |
| 6         | -1.40014994 | 0.71213931  | 0.92934281  | 1 | 3.90965009  | -0.50746071 | -0.99635720 |  |  |  |  |
| 1         | 1.03775001  | 0.36833930  | -1.81295717 | 1 | 2.66144991  | -1.57246065 | -1.65705717 |  |  |  |  |
| 6         | 1.99284995  | -0.33396071 | 0.00484284  | 6 | -3.05664992 | -1.20196068 | 0.65544283  |  |  |  |  |
| 1         | 2.24175000  | 1.46893930  | -1.17325723 | 1 | -1.18355000 | -1.00696063 | -0.36185715 |  |  |  |  |
| 6         | -1.99205005 | -0.34066069 | -0.03015716 | 6 | -2.57975006 | 0.33543932  | -1.27325714 |  |  |  |  |
| 1         | -2.21134996 | 1.35123932  | 1.30594277  | 1 | -3.02935004 | -0.38956070 | -1.95875716 |  |  |  |  |
| 1         | -0.98374999 | 0.20463930  | 1.81224287  | 1 | -1.81464994 | 0.88173926  | -1.84415722 |  |  |  |  |
| 6         | 2.56664991  | 0.23533930  | 1.30634284  | 1 | -3.35505009 | 1.05503929  | -0.98575717 |  |  |  |  |
| 6         | 3.06084991  | -1.14796066 | -0.73135716 | 1 | -3.45315003 | -1.96756077 | -0.02015716 |  |  |  |  |
| 1         | 1.17375004  | -1.01656067 | 0.27134284  | 1 | -3.89385009 | -0.57706070 | 0.98654282  |  |  |  |  |
| 1         | 2.99394989  | -0.54726070 | 1.94084287  | 1 | -2.64615011 | -1.70436060 | 1.53634286  |  |  |  |  |
| 1         | 1.79834998  | 0.74753928  | 1.90314281  | 1 | -0.04805002 | 3.37653923  | 0.05234284  |  |  |  |  |

### <sup>i</sup>Bu<sub>2</sub>AlF

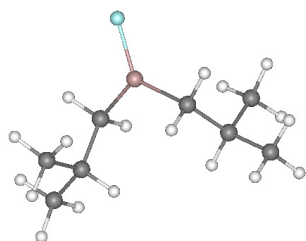

|                                           |                             |
|-------------------------------------------|-----------------------------|
| Zero-point vibrational energy             | 650028.3 (Joules/Mol)       |
|                                           | 155.36048 (Kcal/Mol)        |
| Zero-point correction                     | 0.247583 (Hartree/Particle) |
| Thermal correction to Energy              | 0.262147                    |
| Thermal correction to Enthalpy            | 0.263092                    |
| Thermal correction to Gibbs Free Energy   | 0.204262                    |
| Sum of electronic and zero-point Energies | -657.602812                 |

|                                             |             |
|---------------------------------------------|-------------|
| Sum of electronic and thermal Energies      | -657.588247 |
| Sum of electronic and thermal Enthalpies    | -657.587303 |
| Sum of electronic and thermal Free Energies | -657.646132 |

| cartesian |             |             |             |   |             |             |             |  |  |  |  |
|-----------|-------------|-------------|-------------|---|-------------|-------------|-------------|--|--|--|--|
| 13        | -0.00083931 | 1.62581789  | 0.00134998  | 1 | -3.27653933 | 1.03181791  | -1.18494999 |  |  |  |  |
| 6         | -1.48273921 | 0.71481788  | 0.88824999  | 1 | -3.69283938 | -1.86618221 | 0.04264998  |  |  |  |  |
| 6         | 1.48306072  | 0.71841788  | -0.88605005 | 1 | -4.07253933 | -0.35048211 | 0.87914997  |  |  |  |  |
| 1         | -1.15173924 | 0.26341787  | 1.83404994  | 1 | -2.96673918 | -1.51538217 | 1.62144995  |  |  |  |  |
| 6         | -2.09923935 | -0.37168211 | -0.01665002 | 6 | 3.27536082  | -1.06898212 | -0.67275000 |  |  |  |  |
| 1         | -2.25613928 | 1.44801784  | 1.15674996  | 1 | 1.33286071  | -1.12918210 | 0.22544998  |  |  |  |  |
| 6         | 2.09946084  | -0.37058210 | 0.01594998  | 6 | 2.54836082  | 0.22761787  | 1.35294998  |  |  |  |  |
| 1         | 2.25616074  | 1.45291781  | -1.15155005 | 1 | 3.01356077  | -0.52248210 | 1.99934995  |  |  |  |  |
| 1         | 1.15326071  | 0.26981789  | -1.83354998 | 1 | 1.70636070  | 0.65481788  | 1.91715002  |  |  |  |  |
| 6         | -2.54833937 | 0.23021787  | -1.35195005 | 1 | 3.27666068  | 1.02961779  | 1.18814993  |  |  |  |  |
| 6         | -3.27503920 | -1.07208216 | 0.67025000  | 1 | 3.69326067  | -1.86468208 | -0.04735002 |  |  |  |  |
| 1         | -1.33253932 | -1.12968218 | -0.22835001 | 1 | 4.07286072  | -0.34658211 | -0.87975001 |  |  |  |  |
| 1         | -3.01363921 | -0.51818210 | -2.00035024 | 1 | 2.96716070  | -1.50978208 | -1.62514997 |  |  |  |  |
| 1         | -1.70643926 | 0.65871787  | -1.91534996 | 9 | -0.00303931 | 3.30991793  | 0.00084998  |  |  |  |  |

<sup>i</sup>Bu<sub>2</sub>AlCl

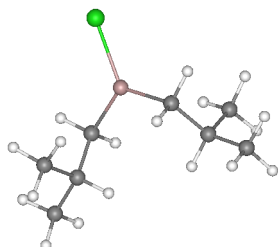

|                                             |                             |
|---------------------------------------------|-----------------------------|
| Zero-point vibrational energy               | 647950.8 (Joules/Mol)       |
|                                             | 154.86396 (Kcal/Mol)        |
| Zero-point correction                       | 0.246791 (Hartree/Particle) |
| Thermal correction to Energy                | 0.261656                    |
| Thermal correction to Enthalpy              | 0.262600                    |
| Thermal correction to Gibbs Free Energy     | 0.202152                    |
| Sum of electronic and zero-point Energies   | -1017.907594                |
| Sum of electronic and thermal Energies      | -1017.892730                |
| Sum of electronic and thermal Enthalpies    | -1017.891785                |
| Sum of electronic and thermal Free Energies | -1017.952233                |

| cartesian |             |            |            |   |             |            |             |  |  |  |  |
|-----------|-------------|------------|------------|---|-------------|------------|-------------|--|--|--|--|
| 13        | -0.06489286 | 1.68887162 | 0.03645718 | 1 | -3.32349300 | 0.89927155 | -1.14404285 |  |  |  |  |

|   |             |             |             |    |             |             |             |
|---|-------------|-------------|-------------|----|-------------|-------------|-------------|
| 6 | -1.48939288 | 0.67107153  | 0.90525717  | 1  | -3.49249291 | -2.05762839 | 0.00965718  |
| 6 | 1.46210718  | 0.84097153  | -0.84174281 | 1  | -3.98659301 | -0.60142845 | 0.89065719  |
| 1 | -1.12339282 | 0.22377151  | 1.84025717  | 1  | -2.78029299 | -1.68992829 | 1.59075713  |
| 6 | -2.02699280 | -0.43702847 | -0.02354282 | 6  | 3.21220708  | -0.99402851 | -0.72484285 |
| 1 | -2.31259298 | 1.34007156  | 1.19085717  | 1  | 1.27090716  | -1.05602837 | 0.17645717  |
| 6 | 2.05410695  | -0.30512851 | 0.00285718  | 6  | 2.51980710  | 0.21337152  | 1.36685717  |
| 1 | 2.24210715  | 1.58667159  | -1.04854286 | 1  | 2.96510696  | -0.58172852 | 1.97245717  |
| 1 | 1.15020716  | 0.45337152  | -1.82264280 | 1  | 1.69090712  | 0.63567156  | 1.95235717  |
| 6 | -2.53739285 | 0.16107154  | -1.33854282 | 1  | 3.27080703  | 1.00127149  | 1.24025714  |
| 6 | -3.13449287 | -1.24852848 | 0.65475720  | 1  | 3.61580706  | -1.82712841 | -0.13994282 |
| 1 | -1.20429277 | -1.12512851 | -0.26314282 | 1  | 4.02360725  | -0.27942842 | -0.90194285 |
| 1 | -2.95069289 | -0.60562843 | -2.00064278 | 1  | 2.89050698  | -1.38312840 | -1.69504285 |
| 1 | -1.73899281 | 0.66847152  | -1.89944279 | 17 | -0.20219284 | 3.80797148  | 0.01415718  |

### <sup>i</sup>Bu<sub>2</sub>AlMe

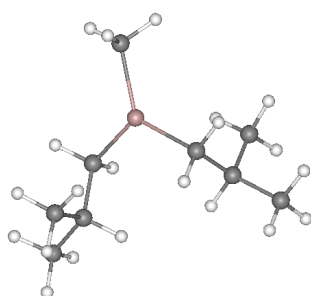

|                                             |                             |
|---------------------------------------------|-----------------------------|
| Zero-point vibrational energy               | 737304.7 (Joules/Mol)       |
|                                             | 176.22006 (Kcal/Mol)        |
| Zero-point correction                       | 0.280825 (Hartree/Particle) |
| Thermal correction to Energy                | 0.296627                    |
| Thermal correction to Enthalpy              | 0.297571                    |
| Thermal correction to Gibbs Free Energy     | 0.235473                    |
| Sum of electronic and zero-point Energies   | -597.554227                 |
| Sum of electronic and thermal Energies      | -597.538424                 |
| Sum of electronic and thermal Enthalpies    | -597.537480                 |
| Sum of electronic and thermal Free Energies | -597.599578                 |

### cartesian

|    |             |             |             |   |             |             |             |
|----|-------------|-------------|-------------|---|-------------|-------------|-------------|
| 13 | 0.05293867  | 1.37268722  | -0.06253873 | 1 | 3.82563877  | -1.15381277 | -0.97243875 |
| 6  | 1.35613859  | 0.18758714  | -0.95083874 | 1 | 2.54563880  | -2.27741289 | -1.45113873 |
| 6  | -1.45526135 | 0.47948712  | 0.84056127  | 6 | -3.17076135 | -1.39791286 | 0.77626127  |
| 1  | 0.89103872  | -0.36101288 | -1.78273869 | 1 | -1.25826132 | -1.40891278 | -0.18803872 |
| 6  | 1.94393861  | -0.82491285 | 0.05426127  | 6 | -2.57526135 | -0.16751285 | -1.32983863 |
| 1  | 2.17963886  | 0.76628715  | -1.39473867 | 1 | -3.02166128 | -0.97101289 | -1.92413867 |

---

|   |             |             |             |   |             |             |             |
|---|-------------|-------------|-------------|---|-------------|-------------|-------------|
| 6 | -2.05246115 | -0.67751288 | 0.01676127  | 1 | -1.77416134 | 0.27608714  | -1.93713868 |
| 1 | -2.25116134 | 1.20058715  | 1.07966125  | 1 | -3.34116125 | 0.60148716  | -1.17553866 |
| 1 | -1.11336136 | 0.09148714  | 1.81306136  | 1 | -3.57396126 | -2.23901272 | 0.20206128  |
| 6 | 2.56573868  | -0.09781286 | 1.25176132  | 1 | -3.99346113 | -0.70381290 | 0.98286122  |
| 6 | 2.97973871  | -1.74331284 | -0.60073876 | 1 | -2.80936122 | -1.78201282 | 1.73476136  |
| 1 | 1.12683868  | -1.45481277 | 0.43276128  | 6 | 0.29583865  | 3.31778717  | -0.04273873 |
| 1 | 3.02243876  | -0.79481286 | 1.96136129  | 1 | -0.39176133 | 3.83878708  | 0.63046128  |
| 1 | 1.81953859  | 0.48318714  | 1.81386125  | 1 | 0.14733867  | 3.73778725  | -1.04583871 |
| 1 | 3.34213877  | 0.59928715  | 0.91536123  | 1 | 1.31843865  | 3.58768725  | 0.24706128  |
| 1 | 3.36903882  | -2.48461270 | 0.10556127  |   |             |             |             |

---

## S1.2. Reaction profile without Zr–Al coordination

### I-0

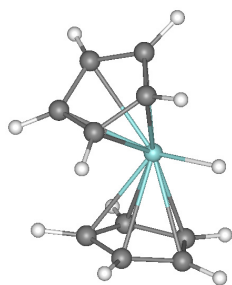

|                                             |                             |
|---------------------------------------------|-----------------------------|
| Zero-point vibrational energy               | 463865.2 (Joules/Mol)       |
|                                             | 110.86645 (Kcal/Mol)        |
| Zero-point correction                       | 0.176677 (Hartree/Particle) |
| Thermal correction to Energy                | 0.186380                    |
| Thermal correction to Enthalpy              | 0.187324                    |
| Thermal correction to Gibbs Free Energy     | 0.139040                    |
| Sum of electronic and zero-point Energies   | -3927.913963                |
| Sum of electronic and thermal Energies      | -3927.904260                |
| Sum of electronic and thermal Enthalpies    | -3927.903316                |
| Sum of electronic and thermal Free Energies | -3927.951600                |

|   |             |             |             | cartesian |             |             |             |
|---|-------------|-------------|-------------|-----------|-------------|-------------|-------------|
| 6 | 1.65699995  | 1.40859997  | -0.11290000 | 6         | -1.66550004 | 0.75360000  | 1.15439999  |
| 6 | 1.66520000  | 0.75440001  | 1.15390003  | 6         | -2.18300009 | -0.55739999 | 0.97310001  |
| 6 | 2.18269992  | -0.55669999 | 0.97380000  | 6         | -2.45650005 | -0.72270000 | -0.41110000 |
| 6 | 2.45659995  | -0.72320002 | -0.41020000 | 1         | -2.87129998 | -1.61310005 | -0.87099999 |
| 6 | 2.14969993  | 0.49720001  | -1.07449996 | 1         | -2.27640009 | 0.69980001  | -2.13269997 |
| 1 | 2.27710009  | 0.69800001  | -2.13290000 | 1         | -1.35899997 | 2.43260002  | -0.29990000 |
| 1 | 1.35930002  | 2.43239999  | -0.30180001 | 1         | -2.35560012 | -1.28989995 | 1.74940002  |
| 1 | 2.35509992  | -1.28859997 | 1.75059998  | 40        | 0.00000000  | -0.44040000 | -0.21110000 |
| 1 | 2.87140012  | -1.61389995 | -0.86930001 | 1         | 0.00000000  | -1.79999995 | 0.99080002  |
| 6 | -2.14930010 | 0.49810001  | -1.07439995 | 1         | -1.38110006 | 1.19669998  | 2.10080004  |
| 6 | -1.65690005 | 1.40869999  | -0.11190000 | 1         | 1.38059998  | 1.19830000  | 2.09990001  |

### I-1

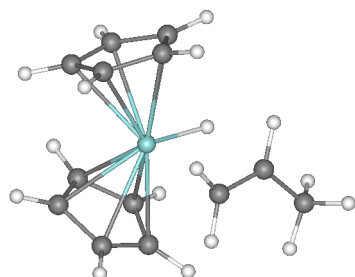

|                                             |                             |
|---------------------------------------------|-----------------------------|
| Zero-point vibrational energy               | 679571.4 (Joules/Mol)       |
|                                             | 162.42147 (Kcal/Mol)        |
| Zero-point correction                       | 0.258835 (Hartree/Particle) |
| Thermal correction to Energy                | 0.272972                    |
| Thermal correction to Enthalpy              | 0.273916                    |
| Thermal correction to Gibbs Free Energy     | 0.217132                    |
| Sum of electronic and zero-point Energies   | -4045.725664                |
| Sum of electronic and thermal Energies      | -4045.711527                |
| Sum of electronic and thermal Enthalpies    | -4045.710583                |
| Sum of electronic and thermal Free Energies | -4045.767368                |

| cartesian |             |             |             |    |             |             |             |
|-----------|-------------|-------------|-------------|----|-------------|-------------|-------------|
| 6         | -1.47160006 | 1.97000003  | 0.09150000  | 1  | 1.12310004  | -2.31660008 | 1.93949997  |
| 6         | -0.56910002 | 2.12630010  | 1.17659998  | 1  | 2.63319993  | -0.09750000 | 1.92200005  |
| 6         | 0.72579998  | 2.33270001  | 0.63309997  | 40 | 0.11790000  | 0.02150000  | 0.00490000  |
| 6         | 0.61890000  | 2.32189989  | -0.78759998 | 6  | -1.86329997 | -1.14859998 | -1.27929997 |
| 6         | -0.74040002 | 2.10500002  | -1.11650002 | 6  | -2.20580006 | -1.71319997 | -0.09920000 |
| 1         | -1.14909995 | 2.05559993  | -2.11969995 | 6  | -3.37770009 | -1.29939997 | 0.72960001  |
| 1         | -2.53900003 | 1.80550003  | 0.17850000  | 1  | -2.47569990 | -0.36019999 | -1.71150005 |
| 1         | -0.82840002 | 2.11129999  | 2.22639990  | 1  | -1.11179996 | -1.61179996 | -1.92429996 |
| 1         | 1.63170004  | 2.50999999  | 1.19939995  | 1  | -0.59230000 | -0.41630000 | 1.62849998  |
| 6         | 1.25500000  | -2.18289995 | -0.28979999 | 1  | -3.08450007 | -1.14110005 | 1.76950002  |
| 6         | 1.47889996  | -1.80180001 | 1.05739999  | 1  | -4.11250019 | -2.11190009 | 0.72030002  |
| 6         | 2.28320003  | -0.63069999 | 1.04639995  | 1  | -3.85570002 | -0.40059999 | 0.33710000  |
| 6         | 2.58380008  | -0.31169999 | -0.30500001 | 1  | 3.20120001  | 0.51190001  | -0.64170003 |
| 6         | 1.94140005  | -1.26110005 | -1.13259995 | 1  | 1.42410004  | 2.48889995  | -1.49220002 |
| 1         | 1.99220002  | -1.29729998 | -2.21510005 | 1  | -1.63660002 | -2.57159996 | 0.26040000  |
| 1         | 0.70889997  | -3.05839992 | -0.62210000 |    |             |             |             |

## I-2\_a

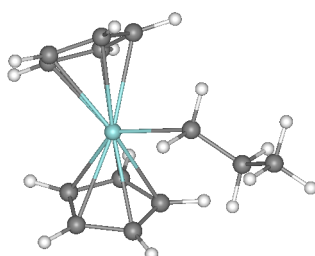

|                                |                             |
|--------------------------------|-----------------------------|
| Zero-point vibrational energy  | 692418.1 (Joules/Mol)       |
|                                | 165.49189 (Kcal/Mol)        |
| Zero-point correction          | 0.263728 (Hartree/Particle) |
| Thermal correction to Energy   | 0.278005                    |
| Thermal correction to Enthalpy | 0.278949                    |

|                                             |              |
|---------------------------------------------|--------------|
| Thermal correction to Gibbs Free Energy     | 0.221886     |
| Sum of electronic and zero-point Energies   | -4045.724543 |
| Sum of electronic and thermal Energies      | -4045.710267 |
| Sum of electronic and thermal Enthalpies    | -4045.709323 |
| Sum of electronic and thermal Free Energies | -4045.766386 |

|    |             |             |             | cartesian |             |             |             |
|----|-------------|-------------|-------------|-----------|-------------|-------------|-------------|
| 6  | 1.25453222  | -0.82727426 | 0.13028066  | 1         | 1.19003224  | -1.90927410 | -0.02301934 |
| 6  | -1.45456779 | -1.94137430 | -0.85861933 | 6         | 2.61503220  | -0.33497423 | -0.34651935 |
| 6  | -2.37816763 | -0.90597433 | -1.16931939 | 1         | 1.19263220  | -0.69377428 | 1.26388061  |
| 6  | -3.09626770 | -0.58437425 | 0.01858066  | 6         | 3.77413225  | -1.14177418 | 0.24828066  |
| 6  | -2.59786797 | -1.40057421 | 1.05988061  | 1         | 2.75553226  | 0.72402573  | -0.11071934 |
| 6  | -1.57646775 | -2.23247433 | 0.52178067  | 1         | 4.73403215  | -0.77677429 | -0.12361935 |
| 1  | -3.89386797 | 0.14262575  | 0.10568066  | 1         | 3.78363228  | -1.06487417 | 1.33928061  |
| 1  | -2.94536781 | -1.40387416 | 2.08758068  | 1         | 3.69023228  | -2.19967413 | -0.01401935 |
| 6  | -0.95916778 | 2.09132576  | -1.12651932 | 1         | -0.77886778 | -2.42087412 | -1.55491936 |
| 6  | -1.65726781 | 2.42062569  | 0.07118066  | 1         | -1.01036787 | -2.97737432 | 1.06878066  |
| 6  | -0.70566779 | 2.52432585  | 1.11248064  | 1         | -2.55206776 | -0.48367426 | -2.15131927 |
| 6  | 0.58053219  | 2.26062584  | 0.56568062  | 1         | -0.91856778 | 2.77552581  | 2.14618063  |
| 6  | 0.42583221  | 2.00902581  | -0.82101929 | 1         | -2.72306776 | 2.58802581  | 0.16358066  |
| 1  | 1.22183216  | 1.79592574  | -1.52311933 | 1         | -1.40016770 | 1.98142576  | -2.10931921 |
| 1  | 1.51633227  | 2.27682590  | 1.11218059  | 1         | 2.63953209  | -0.41937426 | -1.43901932 |
| 40 | -0.72606778 | 0.12802576  | 0.35578066  |           |             |             |             |

## I-2\_b

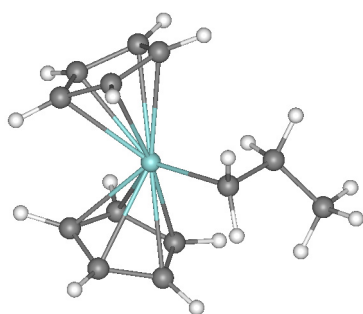

|                                           |                             |
|-------------------------------------------|-----------------------------|
| Zero-point vibrational energy             | 691916.6 (Joules/Mol)       |
|                                           | 165.37203 (Kcal/Mol)        |
| Zero-point correction                     | 0.263537 (Hartree/Particle) |
| Thermal correction to Energy              | 0.277639                    |
| Thermal correction to Enthalpy            | 0.278583                    |
| Thermal correction to Gibbs Free Energy   | 0.221509                    |
| Sum of electronic and zero-point Energies | -4045.741248                |
| Sum of electronic and thermal Energies    | -4045.727146                |

|                                             |              |
|---------------------------------------------|--------------|
| Sum of electronic and thermal Enthalpies    | -4045.726202 |
| Sum of electronic and thermal Free Energies | -4045.783276 |

| cartesian |             |             |             |    |             |             |             |  |  |  |  |
|-----------|-------------|-------------|-------------|----|-------------|-------------|-------------|--|--|--|--|
| 6         | -2.11848068 | -1.58108389 | -0.14251934 | 1  | 2.20761919  | 1.20691609  | -1.50481939 |  |  |  |  |
| 6         | -2.27318048 | -0.70938390 | -1.25841939 | 1  | -0.07478060 | 2.50741625  | -2.10351944 |  |  |  |  |
| 6         | -2.69238043 | 0.55231607  | -0.77201939 | 40 | -0.37938058 | 0.23621611  | 0.09298065  |  |  |  |  |
| 6         | -2.78158045 | 0.46861610  | 0.64678061  | 6  | 2.74611950  | -1.76658392 | -0.46151933 |  |  |  |  |
| 6         | -2.44428062 | -0.86048388 | 1.02758062  | 6  | 0.79401934  | -1.34388387 | 1.16368067  |  |  |  |  |
| 1         | -2.42968082 | -1.24948394 | 2.03858066  | 6  | 1.23741937  | -1.80138385 | -0.21391934 |  |  |  |  |
| 1         | -1.81658065 | -2.62068367 | -0.18491934 | 1  | 0.19241941  | -2.08668375 | 1.68658066  |  |  |  |  |
| 1         | -2.12528062 | -0.97538388 | -2.29921937 | 1  | 1.62921941  | -1.02328384 | 1.78578067  |  |  |  |  |
| 1         | -2.91318083 | 1.42621613  | -1.37261939 | 1  | 0.79541945  | -1.15248394 | -1.06351936 |  |  |  |  |
| 6         | 1.65331936  | 1.61761606  | 0.62318063  | 1  | 2.99111938  | -1.98818386 | -1.50201941 |  |  |  |  |
| 6         | 1.50821936  | 1.62441611  | -0.78911936 | 1  | 3.16401958  | -0.78938389 | -0.20491935 |  |  |  |  |
| 6         | 0.30511940  | 2.31311607  | -1.10721934 | 1  | -1.20548058 | 3.30591631  | 0.20648065  |  |  |  |  |
| 6         | -0.28788060 | 2.73841619  | 0.10958065  | 1  | -3.10838079 | 1.25901616  | 1.31188059  |  |  |  |  |
| 6         | 0.53871942  | 2.30051613  | 1.17718065  | 1  | 3.22941923  | -2.51198387 | 0.17298065  |  |  |  |  |
| 1         | 0.36231941  | 2.47731590  | 2.23238063  | 1  | 0.81471944  | -2.77388382 | -0.47601935 |  |  |  |  |
| 1         | 2.48131943  | 1.20021605  | 1.18068063  |    |             |             |             |  |  |  |  |

### I-3

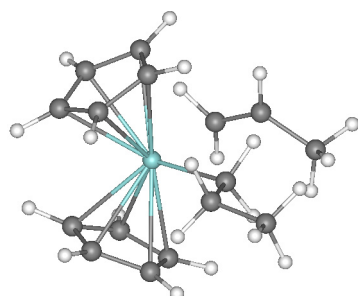

|                                             |                             |
|---------------------------------------------|-----------------------------|
| Zero-point vibrational energy               | 911019.4 (Joules/Mol)       |
|                                             | 217.73885 (Kcal/Mol)        |
| Zero-point correction                       | 0.346989 (Hartree/Particle) |
| Thermal correction to Energy                | 0.366459                    |
| Thermal correction to Enthalpy              | 0.367403                    |
| Thermal correction to Gibbs Free Energy     | 0.299219                    |
| Sum of electronic and zero-point Energies   | -4163.530477                |
| Sum of electronic and thermal Energies      | -4163.511007                |
| Sum of electronic and thermal Enthalpies    | -4163.510063                |
| Sum of electronic and thermal Free Energies | -4163.578247                |

| cartesian |             |             |             |    |             |             |             |  |  |
|-----------|-------------|-------------|-------------|----|-------------|-------------|-------------|--|--|
| 6         | 0.02170000  | -1.44910002 | -2.03469992 | 1  | 2.11450005  | -1.92340004 | 1.23619998  |  |  |
| 6         | -0.50770003 | -2.28489995 | -1.01929998 | 40 | -0.40869999 | 0.01480000  | -0.00610000 |  |  |
| 6         | -1.85259998 | -1.89600003 | -0.78579998 | 1  | 2.29940009  | -2.24810004 | -0.47409999 |  |  |
| 6         | -2.14610004 | -0.79799998 | -1.62689996 | 6  | 1.85060000  | -0.17240000 | -0.04180000 |  |  |
| 6         | -0.98369998 | -0.52380002 | -2.40420008 | 6  | 2.52390003  | -1.51100004 | 0.30500001  |  |  |
| 1         | -0.90619999 | 0.22570001  | -3.18350005 | 6  | 4.04409981  | -1.38339996 | 0.44180000  |  |  |
| 1         | 1.01689994  | -1.51479995 | -2.45490003 | 1  | 2.23550010  | 0.60850000  | 0.63150001  |  |  |
| 1         | 0.01410000  | -3.09649992 | -0.52600002 | 1  | 2.16520000  | 0.11550000  | -1.05820000 |  |  |
| 1         | -2.53550005 | -2.36389995 | -0.08840000 | 1  | 4.50610018  | -2.35039997 | 0.65560001  |  |  |
| 1         | -3.09920001 | -0.28529999 | -1.69250000 | 1  | 4.30600023  | -0.69700003 | 1.25209999  |  |  |
| 6         | -0.28110000 | 1.26209998  | 2.19239998  | 1  | 4.48369980  | -0.99510002 | -0.48130000 |  |  |
| 6         | 0.23480000  | -0.03180000 | 2.43390012  | 6  | -0.70580000 | 2.53150010  | -0.91079998 |  |  |
| 6         | -0.81660002 | -0.96499997 | 2.24020004  | 6  | 0.53799999  | 2.43989992  | -1.42700005 |  |  |
| 6         | -1.99839997 | -0.23480000 | 1.92270005  | 6  | 1.73640001  | 3.14240003  | -0.87599999 |  |  |
| 6         | -1.66680002 | 1.13540006  | 1.88919997  | 1  | -1.57149994 | 2.14129996  | -1.45150006 |  |  |
| 1         | -2.35599995 | 1.94620001  | 1.68359995  | 1  | -0.90120000 | 3.17050004  | -0.05350000 |  |  |
| 1         | 0.27710000  | 2.18889999  | 2.25850010  | 1  | 0.68480003  | 1.87320006  | -2.34759998 |  |  |
| 1         | 1.25409997  | -0.27020001 | 2.70810008  | 1  | 2.60139990  | 2.47830009  | -0.82260001 |  |  |
| 1         | -0.74519998 | -2.03940010 | 2.36260009  | 1  | 1.54020000  | 3.57410002  | 0.10710000  |  |  |
| 1         | -2.98200011 | -0.65249997 | 1.75020003  | 1  | 2.00020003  | 3.95569992  | -1.56140006 |  |  |

### I-3\_a

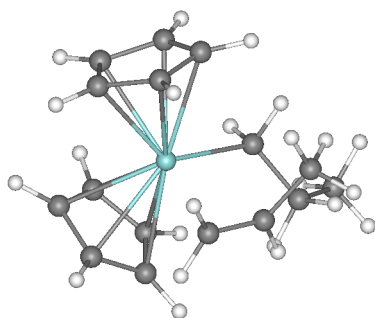

|                                             |                             |
|---------------------------------------------|-----------------------------|
| Zero-point vibrational energy               | 911998.7 (Joules/Mol)       |
|                                             | 217.97293 (Kcal/Mol)        |
| Zero-point correction                       | 0.347362 (Hartree/Particle) |
| Thermal correction to Energy                | 0.366687                    |
| Thermal correction to Enthalpy              | 0.367631                    |
| Thermal correction to Gibbs Free Energy     | 0.300474                    |
| Sum of electronic and zero-point Energies   | -4163.527795                |
| Sum of electronic and thermal Energies      | -4163.508470                |
| Sum of electronic and thermal Enthalpies    | -4163.507526                |
| Sum of electronic and thermal Free Energies | -4163.574683                |

| cartesian |             |             |             |    |             |             |             |
|-----------|-------------|-------------|-------------|----|-------------|-------------|-------------|
| 6         | 0.26818997  | -2.53561258 | -0.11927500 | 40 | -0.77161002 | -0.23171255 | -0.02197501 |
| 6         | -1.00251007 | -2.65811253 | 0.50132501  | 1  | 2.86349010  | 0.68998742  | -0.10307501 |
| 6         | -1.99821007 | -2.38921261 | -0.47967499 | 6  | 1.19678998  | 0.00528744  | 1.09912503  |
| 6         | -1.34471011 | -2.05821252 | -1.68327498 | 6  | 2.55209017  | -0.23171255 | 0.40342501  |
| 6         | 0.06208995  | -2.13901258 | -1.45927501 | 6  | 3.65189028  | -0.63451254 | 1.39072502  |
| 1         | 0.83698988  | -1.97401249 | -2.19977498 | 1  | 1.08908999  | -0.72651255 | 1.91982496  |
| 1         | 1.22448993  | -2.70611262 | 0.35742500  | 1  | 1.22958994  | 0.97618747  | 1.60962498  |
| 1         | -1.18241000 | -2.96021247 | 1.52632499  | 1  | 4.61659002  | -0.74931252 | 0.89022499  |
| 1         | -3.06971025 | -2.42731261 | -0.32807499 | 1  | 3.40828991  | -1.58471251 | 1.87612498  |
| 1         | -1.83481002 | -1.81591249 | -2.61897492 | 1  | 3.76209021  | 0.11948743  | 2.17472506  |
| 6         | -1.36191010 | 1.85478747  | 1.32422495  | 6  | -0.47171006 | 1.08268750  | -2.47327495 |
| 6         | -1.58151007 | 0.73658741  | 2.16422510  | 6  | 0.67548990  | 1.40638745  | -1.84117496 |
| 6         | -2.64070988 | -0.02681255 | 1.60972500  | 6  | 0.94368994  | 2.70998740  | -1.15517497 |
| 6         | -3.07711029 | 0.62138748  | 0.42212498  | 1  | -0.53421009 | 0.18768746  | -3.08547497 |
| 6         | -2.29030991 | 1.78908741  | 0.25522500  | 1  | -1.30440998 | 1.78028750  | -2.52627492 |
| 1         | -2.40701008 | 2.52398753  | -0.53167498 | 1  | 1.50808990  | 0.70228744  | -1.89867496 |
| 1         | -0.62631005 | 2.63288736  | 1.48542500  | 1  | 1.37388992  | 2.56218743  | -0.16077501 |
| 1         | -1.03331006 | 0.50548744  | 3.06932497  | 1  | 0.04578993  | 3.32738757  | -1.08437502 |
| 1         | -3.06341028 | -0.92901254 | 2.03362489  | 1  | 1.68989003  | 3.25808740  | -1.74137497 |
| 1         | -3.89000988 | 0.30148745  | -0.21857500 | 1  | 2.48739004  | -0.99561250 | -0.38257501 |

### I-3\_b

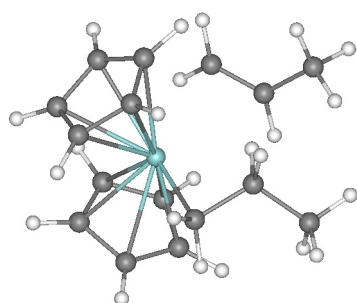

|                                             |                             |
|---------------------------------------------|-----------------------------|
| Zero-point vibrational energy               | 913477.1 (Joules/Mol)       |
|                                             | 218.32626 (Kcal/Mol)        |
| Zero-point correction                       | 0.347925 (Hartree/Particle) |
| Thermal correction to Energy                | 0.366985                    |
| Thermal correction to Enthalpy              | 0.367929                    |
| Thermal correction to Gibbs Free Energy     | 0.300920                    |
| Sum of electronic and zero-point Energies   | -4163.529300                |
| Sum of electronic and thermal Energies      | -4163.510240                |
| Sum of electronic and thermal Enthalpies    | -4163.509296                |
| Sum of electronic and thermal Free Energies | -4163.576305                |

| cartesian |             |             |             |   |             |             |             |
|-----------|-------------|-------------|-------------|---|-------------|-------------|-------------|
| 6         | 0.64131999  | -2.50299239 | -0.15420251 | 1 | -2.28688002 | 2.10580754  | -1.19280255 |
| 6         | 1.71011996  | -2.15159249 | 0.72099745  | 1 | -2.65637994 | 1.50290751  | -2.81060243 |
| 6         | 2.70562005  | -1.51049244 | -0.05050251 | 6 | -0.05888000 | 0.63030750  | -2.08400249 |
| 6         | 2.24832010  | -1.43409240 | -1.39190257 | 6 | -1.43247998 | 0.15750751  | -1.65060258 |
| 6         | 0.98342001  | -2.07109237 | -1.45490253 | 1 | 0.33052000  | 0.10360751  | -2.95280242 |
| 1         | 0.37911999  | -2.19419241 | -2.34430242 | 1 | -0.05478001 | 1.70230758  | -2.27790260 |
| 1         | -0.26097998 | -3.03849244 | 0.11759749  | 1 | -1.44728005 | -0.16219249 | -0.55910254 |
| 1         | 1.77751994  | -2.37509251 | 1.77839744  | 1 | -3.50377989 | 0.83470750  | -1.41160250 |
| 1         | 2.78062010  | -0.99189252 | -2.22500253 | 6 | -0.65157998 | -0.88539249 | 2.34319758  |
| 6         | 0.78711998  | 1.92920756  | 1.66569746  | 6 | -1.74088013 | -0.28729248 | 1.82159746  |
| 6         | 2.06172013  | 1.31680763  | 1.62759745  | 6 | -2.93847990 | -1.03849244 | 1.31619751  |
| 6         | 2.62551999  | 1.58000755  | 0.34439752  | 1 | 0.11412001  | -0.33339250 | 2.88099742  |
| 6         | 1.68911994  | 2.32440758  | -0.40500250 | 1 | -0.59958005 | -1.97009242 | 2.39229751  |
| 6         | 0.53711998  | 2.52140760  | 0.40469751  | 1 | -1.82828009 | 0.79960752  | 1.86989748  |
| 1         | -0.35007998 | 3.07740760  | 0.12509750  | 1 | -3.35807991 | -0.59629250 | 0.41059750  |
| 1         | 0.11802000  | 1.94850755  | 2.51789737  | 1 | -2.70867991 | -2.09019232 | 1.13269746  |
| 1         | 2.54952002  | 0.79620749  | 2.44289756  | 1 | -3.71998000 | -0.99119252 | 2.08199739  |
| 1         | 1.83491993  | 2.69230747  | -1.41110253 | 1 | 3.61482000  | 1.29470754  | 0.01129749  |
| 40        | 0.71032000  | 0.01990751  | -0.03390251 | 1 | 3.65622020  | -1.14999247 | 0.32019749  |
| 6         | -2.54038000 | 1.20920753  | -1.76530254 | 1 | -1.71768010 | -0.77239251 | -2.15070248 |

## TS-2

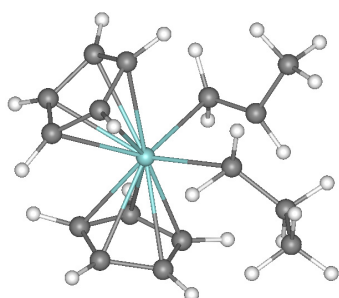

|                                             |                             |
|---------------------------------------------|-----------------------------|
| Zero-point vibrational energy               | 916072.3 (Joules/Mol)       |
|                                             | 218.94652 (Kcal/Mol)        |
| Zero-point correction                       | 0.348913 (Hartree/Particle) |
| Thermal correction to Energy                | 0.366397                    |
| Thermal correction to Enthalpy              | 0.367341                    |
| Thermal correction to Gibbs Free Energy     | 0.304683                    |
| Sum of electronic and zero-point Energies   | -4163.517412                |
| Sum of electronic and thermal Energies      | -4163.499929                |
| Sum of electronic and thermal Enthalpies    | -4163.498984                |
| Sum of electronic and thermal Free Energies | -4163.561642                |

| cartesian |             |             |             |    |             |                         |
|-----------|-------------|-------------|-------------|----|-------------|-------------------------|
| 6         | -0.23428001 | 2.28946257  | -1.20005500 | 40 | -0.90178001 | 0.12046253 -0.05215501  |
| 6         | -0.19028001 | 2.55216265  | 0.18854499  | 1  | 3.32031989  | -0.04233747 -0.10835501 |
| 6         | -1.50668001 | 2.43206263  | 0.70444500  | 6  | 1.29981995  | -0.24453747 0.58984500  |
| 6         | -2.37177992 | 2.13006258  | -0.38245502 | 6  | 2.60112000  | 0.53916252 0.47784498   |
| 6         | -1.58738005 | 2.03696251  | -1.55615497 | 6  | 3.20971990  | 0.84326249 1.85044503   |
| 1         | -1.96138000 | 1.83326256  | -2.55185509 | 1  | 0.68751991  | 0.28586254 1.38804495   |
| 1         | 0.61052001  | 2.30816269  | -1.87875497 | 1  | 1.47231996  | -1.24063754 1.00634503  |
| 1         | 0.69271994  | 2.80306268  | 0.76474500  | 1  | 4.15952015  | 1.37146246 1.74454498   |
| 1         | -1.80568004 | 2.59806252  | 1.73214495  | 1  | 2.54202008  | 1.46966255 2.45024490   |
| 1         | -3.44657993 | 2.01376247  | -0.32515502 | 1  | 3.39511991  | -0.07853747 2.40804482  |
| 6         | -1.29478002 | -2.25733733 | 0.73824501  | 6  | -0.18988001 | -0.79013747 -2.12965512 |
| 6         | -1.47328007 | -1.42693746 | 1.87254500  | 6  | 1.10061991  | -0.83013749 -1.55525506 |
| 6         | -2.60088015 | -0.60203749 | 1.64324498  | 6  | 1.79931998  | -2.15523744 -1.37545502 |
| 6         | -3.13698006 | -0.94113743 | 0.36914498  | 1  | -0.38398001 | -0.00813747 -2.85755515 |
| 6         | -2.33687997 | -1.96943748 | -0.18305501 | 1  | -0.66158003 | -1.74553752 -2.33925509 |
| 1         | -2.51187992 | -2.46573734 | -1.12815499 | 1  | 1.75022006  | 0.01586253 -1.76735497  |
| 1         | -0.52968001 | -3.01463747 | 0.62204498  | 1  | 2.65192008  | -2.11193728 -0.69705498 |
| 1         | -0.85337996 | -1.42023754 | 2.76144481  | 1  | 1.10601997  | -2.92963743 -1.04135501 |
| 1         | -3.00678015 | 0.12846252  | 2.33194494  | 1  | 2.17371988  | -2.45393729 -2.36025524 |
| 1         | -4.02417994 | -0.51633751 | -0.08345501 | 1  | 2.43741989  | 1.47336257 -0.07105501  |

### TS-3

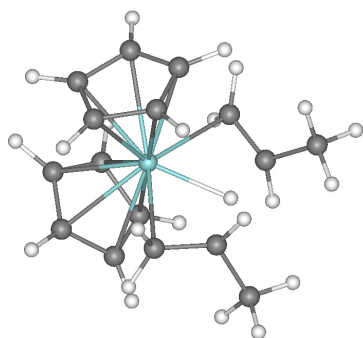

|                                           |                             |
|-------------------------------------------|-----------------------------|
| Zero-point vibrational energy             | 904319.0 (Joules/Mol)       |
|                                           | 216.13742 (Kcal/Mol)        |
| Zero-point correction                     | 0.344437 (Hartree/Particle) |
| Thermal correction to Energy              | 0.362458                    |
| Thermal correction to Enthalpy            | 0.363403                    |
| Thermal correction to Gibbs Free Energy   | 0.299638                    |
| Sum of electronic and zero-point Energies | -4163.506150                |
| Sum of electronic and thermal Energies    | -4163.488129                |
| Sum of electronic and thermal Enthalpies  | -4163.487185                |

Sum of electronic and thermal Free Energies

-4163.550949

|    |             |             |             | cartesian |             |             |             |
|----|-------------|-------------|-------------|-----------|-------------|-------------|-------------|
| 6  | 0.69806993  | -2.56201506 | 0.10210251  | 1         | -2.12783003 | 2.32648492  | -0.96729749 |
| 6  | 1.92306995  | -2.09351492 | 0.64990252  | 1         | -3.18313003 | 1.52488494  | -2.13369727 |
| 6  | 2.65977001  | -1.49601507 | -0.40149748 | 6         | -0.39673007 | 0.55068499  | -2.18329740 |
| 6  | 1.87786984  | -1.54741502 | -1.58069754 | 6         | -1.58293009 | 0.28858498  | -1.48019755 |
| 6  | 0.66736996  | -2.22441506 | -1.26609755 | 1         | -2.00393009 | -0.71101505 | -1.60389745 |
| 1  | -0.13163006 | -2.45931506 | -1.95959747 | 1         | -0.01453006 | -0.19981501 | -2.86399746 |
| 1  | -0.06673005 | -3.10931492 | 0.63760251  | 1         | -0.16813004 | 1.57868493  | -2.44529748 |
| 1  | 2.25856996  | -2.21831512 | 1.67180252  | 1         | -1.33582997 | 0.00008499  | 0.00000251  |
| 1  | 2.17837000  | -1.18441498 | -2.55539727 | 1         | -3.30573010 | 1.11568499  | -0.42079750 |
| 6  | 0.66766995  | 2.22438502  | 1.26620245  | 6         | -0.39673007 | -0.55061501 | 2.18330264  |
| 6  | 1.87817001  | 1.54718494  | 1.58060253  | 6         | -1.58293009 | -0.28841501 | 1.48020256  |
| 6  | 2.65997005  | 1.49578500  | 0.40130252  | 6         | -2.60512996 | -1.37731504 | 1.21680248  |
| 6  | 1.92316985  | 2.09338498  | -0.64989752 | 1         | -0.01443005 | 0.19978499  | 2.86400270  |
| 6  | 0.69816995  | 2.56198502  | -0.10209749 | 1         | -0.16813004 | -1.57861507 | 2.44530272  |
| 1  | -0.06653005 | 3.10938501  | -0.63749748 | 1         | -2.00382996 | 0.71118498  | 1.60400248  |
| 1  | -0.13133007 | 2.45928502  | 1.95980251  | 1         | -3.30573010 | -1.11551499 | 0.42090249  |
| 1  | 2.17866993  | 1.18418503  | 2.55530262  | 1         | -2.12792993 | -2.32631493 | 0.96730250  |
| 1  | 2.25856996  | 2.21818495  | -1.67189753 | 1         | -3.18313003 | -1.52471507 | 2.13370252  |
| 40 | 0.66036993  | -0.00001501 | 0.00000251  | 1         | 3.66017008  | 1.09268498  | 0.32430249  |
| 6  | -2.60512996 | 1.37748504  | -1.21679747 | 1         | 3.66006994  | -1.09291506 | -0.32449749 |

I-4\_a

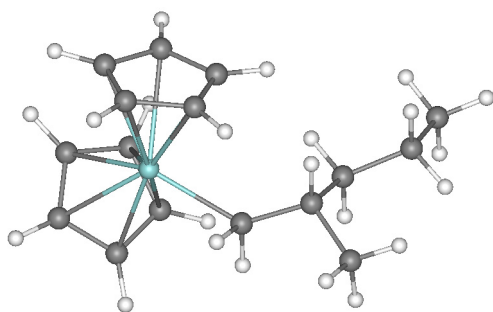

Zero-point vibrational energy

917695.1 (Joules/Mol)

219.33440 (Kcal/Mol)

Zero-point correction

0.349532 (Hartree/Particle)

Thermal correction to Energy

0.367821

Thermal correction to Enthalpy

0.368765

Thermal correction to Gibbs Free Energy

0.301980

Sum of electronic and zero-point Energies

-4163.528347

Sum of electronic and thermal Energies

-4163.510058

|                                             |              |
|---------------------------------------------|--------------|
| Sum of electronic and thermal Enthalpies    | -4163.509114 |
| Sum of electronic and thermal Free Energies | -4163.575899 |

| cartesian |             |             |             |   |                                     |
|-----------|-------------|-------------|-------------|---|-------------------------------------|
| 6         | 0.27660000  | 2.43810010  | 0.44749999  | 6 | -0.83260000 -0.37979999 1.23679996  |
| 6         | 1.69649994  | 2.50600004  | 0.45739999  | 6 | -2.23799992 0.17299999 1.02219999   |
| 6         | 2.17000008  | 2.02230000  | -0.78689998 | 6 | -2.84349990 -0.51200002 -0.21349999 |
| 6         | 1.03900003  | 1.64830005  | -1.56680000 | 1 | -0.90579998 -1.43929994 1.51090002  |
| 6         | -0.13020000 | 1.91760004  | -0.80430001 | 1 | -0.34740001 0.13150001 2.12879992   |
| 1         | -1.15190005 | 1.75940001  | -1.12779999 | 1 | -2.18210006 1.25150001 0.82620001   |
| 1         | -0.37909999 | 2.74340010  | 1.25460005  | 6 | -4.20989990 0.02870000 -0.63830000  |
| 1         | 2.30970001  | 2.88290000  | 1.26909995  | 1 | -2.92630005 -1.59010005 -0.01370000 |
| 1         | 3.20630002  | 1.97060001  | -1.09749997 | 1 | -2.14439988 -0.41389999 -1.05820000 |
| 6         | 1.68499994  | -2.34910011 | 0.72759998  | 1 | -2.63380003 0.40799999 3.15499997   |
| 6         | 2.91499996  | -1.70669997 | 0.40720001  | 1 | -3.25799990 -1.09819996 2.46329999  |
| 6         | 2.84089994  | -1.25430000 | -0.92909998 | 1 | 1.20560002 -1.44149995 -2.44989991  |
| 6         | 1.55970001  | -1.61230004 | -1.44060004 | 1 | 1.06400001 1.27800000 -2.58389997   |
| 6         | 0.85740000  | -2.31110001 | -0.42120001 | 1 | -4.08629990 0.43630001 2.15490007   |
| 1         | -0.13480000 | -2.73410010 | -0.51029998 | 6 | -4.69540024 -0.60920000 -1.93949997 |
| 1         | 1.43949997  | -2.81500006 | 1.67509997  | 1 | -4.94479990 -0.15640000 0.15060000  |
| 1         | 3.76679993  | -1.59689999 | 1.07009995  | 1 | -4.14870024 1.11759996 -0.75849998  |
| 1         | 3.62339997  | -0.73930001 | -1.47210002 | 1 | -5.67460012 -0.22280000 -2.22979999 |
| 40        | 1.12940001  | 0.06400000  | 0.33149999  | 1 | -4.00019979 -0.40889999 -2.76049995 |
| 6         | -3.10570002 | -0.03080000 | 2.27110004  | 1 | -4.78329992 -1.69430006 -1.83299994 |

I-4\_b

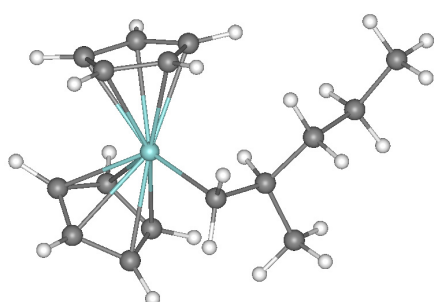

|                                           |                             |
|-------------------------------------------|-----------------------------|
| Zero-point vibrational energy             | 918784.4 (Joules/Mol)       |
|                                           | 219.59475 (Kcal/Mol)        |
| Zero-point correction                     | 0.349947 (Hartree/Particle) |
| Thermal correction to Energy              | 0.367846                    |
| Thermal correction to Enthalpy            | 0.368790                    |
| Thermal correction to Gibbs Free Energy   | 0.303902                    |
| Sum of electronic and zero-point Energies | -4163.545046                |
| Sum of electronic and thermal Energies    | -4163.527147                |

|                                             |              |
|---------------------------------------------|--------------|
| Sum of electronic and thermal Enthalpies    | -4163.526203 |
| Sum of electronic and thermal Free Energies | -4163.591091 |

| cartesian |             |             |             |   |             |             |             |
|-----------|-------------|-------------|-------------|---|-------------|-------------|-------------|
| 6         | 0.25549507  | 2.35509753  | 0.96692002  | 6 | -0.05660492 | -0.68800247 | 1.67331994  |
| 6         | -0.01800489 | 2.24369740  | -0.42147997 | 6 | -0.96850491 | -0.96370250 | 0.49622002  |
| 6         | 1.21089506  | 2.36619735  | -1.12608004 | 6 | -2.29060483 | -0.18170251 | 0.54332000  |
| 6         | 2.24189520  | 2.56249738  | -0.17197998 | 1 | -0.49130487 | -0.00070250 | 2.39931989  |
| 6         | 1.65459514  | 2.54329753  | 1.11961997  | 1 | 0.29239509  | -1.59430254 | 2.16872001  |
| 1         | 2.17869520  | 2.67769742  | 2.05942011  | 1 | -0.48820496 | -0.57560247 | -0.49787995 |
| 1         | -0.47070491 | 2.33469748  | 1.76852000  | 6 | -3.08430481 | -0.17680250 | -0.76337999 |
| 1         | -0.99590492 | 2.11339760  | -0.87228000 | 1 | -2.89600492 | -0.62450248 | 1.34361994  |
| 1         | 1.33409500  | 2.34949756  | -2.20248008 | 1 | -2.09200501 | 0.85129750  | 0.85332000  |
| 6         | 2.42749500  | -2.03290248 | 0.31212002  | 1 | -1.61760497 | -2.62700248 | -0.77377999 |
| 6         | 2.03749514  | -1.84130251 | -1.03978002 | 1 | -0.23800492 | -3.01190257 | 0.26982000  |
| 6         | 2.81529498  | -0.78010249 | -1.57798004 | 1 | 4.43609524  | 0.45619750  | -0.66387999 |
| 6         | 3.69199514  | -0.32300252 | -0.56028003 | 1 | 3.28989506  | 2.72279739  | -0.39037997 |
| 6         | 3.44489503  | -1.08860254 | 0.60872000  | 1 | -1.85250497 | -2.86500263 | 0.96661997  |
| 1         | 3.95959496  | -0.98590249 | 1.55762005  | 6 | -4.30530500 | 0.73919749  | -0.68217999 |
| 1         | 2.04859495  | -2.78540254 | 0.99052000  | 1 | -3.40990496 | -1.19260252 | -1.00777996 |
| 1         | 1.29459500  | -2.41800261 | -1.57897997 | 1 | -2.43400502 | 0.14569750  | -1.58917999 |
| 1         | 2.77199507  | -0.40880251 | -2.59507990 | 1 | -4.87470484 | 0.72309750  | -1.61318004 |
| 40        | 1.35839510  | 0.23709750  | 0.18092002  | 1 | -4.01070499 | 1.77469742  | -0.48577997 |
| 6         | -1.17630494 | -2.45560265 | 0.21062002  | 1 | -4.97320509 | 0.42529750  | 0.12452002  |

I-4\_g

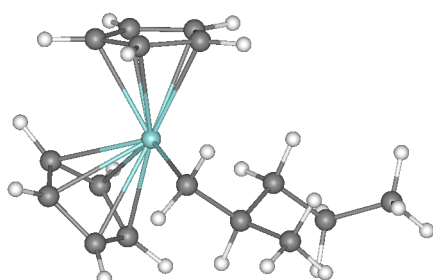

|                                           |                             |
|-------------------------------------------|-----------------------------|
| Zero-point vibrational energy             | 920011.5 (Joules/Mol)       |
|                                           | 219.88803 (Kcal/Mol)        |
| Zero-point correction                     | 0.350414 (Hartree/Particle) |
| Thermal correction to Energy              | 0.368487                    |
| Thermal correction to Enthalpy            | 0.369431                    |
| Thermal correction to Gibbs Free Energy   | 0.304050                    |
| Sum of electronic and zero-point Energies | -4163.536704                |
| Sum of electronic and thermal Energies    | -4163.518631                |

|                                             |              |
|---------------------------------------------|--------------|
| Sum of electronic and thermal Enthalpies    | -4163.517687 |
| Sum of electronic and thermal Free Energies | -4163.583068 |

| cartesian |             |             |             |    |             |             |             |  |  |  |  |
|-----------|-------------|-------------|-------------|----|-------------|-------------|-------------|--|--|--|--|
| 6         | -1.00805748 | -2.36746240 | 0.76401752  | 40 | -1.23915744 | 0.02073751  | 0.03131752  |  |  |  |  |
| 6         | -2.08315754 | -1.80846250 | 1.51451755  | 1  | 3.02844262  | -1.33566248 | 0.90371752  |  |  |  |  |
| 6         | -3.13335752 | -1.51686251 | 0.61431748  | 6  | 1.49374247  | 0.13323750  | 0.48291752  |  |  |  |  |
| 6         | -2.70685744 | -1.87586248 | -0.69378251 | 6  | 2.71984243  | -0.35926250 | 1.29121745  |  |  |  |  |
| 6         | -1.40235758 | -2.42136240 | -0.59598249 | 6  | 3.88924265  | 0.62683749  | 1.26041746  |  |  |  |  |
| 1         | -0.81575751 | -2.81106257 | -1.41728246 | 1  | 2.43214250  | -0.52226251 | 2.33291769  |  |  |  |  |
| 1         | -0.06915754 | -2.72596240 | 1.17121744  | 1  | 4.74504232  | 0.21973750  | 1.80281746  |  |  |  |  |
| 1         | -2.10415745 | -1.65706253 | 2.58761764  | 1  | 3.61074257  | 1.57013750  | 1.73831749  |  |  |  |  |
| 1         | -4.09535742 | -1.09396255 | 0.87611753  | 1  | 4.21314240  | 0.84933752  | 0.24151751  |  |  |  |  |
| 1         | -3.28945756 | -1.78286254 | -1.60298252 | 6  | 0.10204250  | -0.07616249 | -1.74098253 |  |  |  |  |
| 6         | -1.02385747 | 2.52543759  | -0.27388248 | 6  | 1.34744239  | -0.52896249 | -0.91978252 |  |  |  |  |
| 6         | -1.41905749 | 2.30973744  | 1.07301748  | 6  | 2.61734247  | -0.25336251 | -1.74338245 |  |  |  |  |
| 6         | -2.71535754 | 1.73983753  | 1.06471753  | 1  | -0.07735750 | -0.78436249 | -2.55208230 |  |  |  |  |
| 6         | -3.12085748 | 1.60253751  | -0.29278249 | 1  | 0.29794246  | 0.90333748  | -2.18818235 |  |  |  |  |
| 6         | -2.07665753 | 2.10013747  | -1.11708248 | 1  | 1.29374242  | -1.61166251 | -0.75438249 |  |  |  |  |
| 1         | -2.08295751 | 2.14093757  | -2.19888234 | 1  | 3.50724268  | -0.68986249 | -1.28308249 |  |  |  |  |
| 1         | -0.08305752 | 2.94993758  | -0.60248250 | 1  | 2.77534246  | 0.82333750  | -1.86068249 |  |  |  |  |
| 1         | -0.83695751 | 2.55243754  | 1.95521748  | 1  | 2.50534248  | -0.68796247 | -2.73888230 |  |  |  |  |
| 1         | -3.29965734 | 1.47063756  | 1.93611753  | 1  | 0.64384252  | -0.07906249 | 1.19101751  |  |  |  |  |
| 1         | -4.07615757 | 1.22623754  | -0.63748252 | 1  | 1.53614259  | 1.22493756  | 0.38101754  |  |  |  |  |

#### TS-4

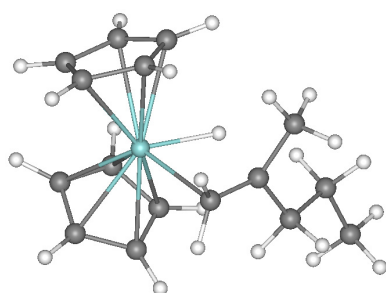

|                                           |                             |
|-------------------------------------------|-----------------------------|
| Zero-point vibrational energy             | 906276.5 (Joules/Mol)       |
|                                           | 216.60528 (Kcal/Mol)        |
| Zero-point correction                     | 0.345182 (Hartree/Particle) |
| Thermal correction to Energy              | 0.363060                    |
| Thermal correction to Enthalpy            | 0.364004                    |
| Thermal correction to Gibbs Free Energy   | 0.299366                    |
| Sum of electronic and zero-point Energies | -4163.531410                |
| Sum of electronic and thermal Energies    | -4163.513533                |

|                                             |              |
|---------------------------------------------|--------------|
| Sum of electronic and thermal Enthalpies    | -4163.512588 |
| Sum of electronic and thermal Free Energies | -4163.577226 |

| cartesian |             |             |             |   |             |                         |
|-----------|-------------|-------------|-------------|---|-------------|-------------------------|
| 6         | -2.36525011 | -2.05958486 | 0.22251251  | 6 | 0.22614992  | -0.83908498 1.87041259  |
| 6         | -1.93115008 | -1.79458487 | -1.10248744 | 6 | 1.10144997  | -1.09188485 0.81771255  |
| 6         | -2.69115019 | -0.70088494 | -1.59728742 | 6 | 1.18324995  | -2.47228479 0.21381250  |
| 6         | -3.61105013 | -0.31058496 | -0.58828747 | 1 | -0.35195008 | -1.66618490 2.27991247  |
| 6         | -3.40264988 | -1.13918495 | 0.53921252  | 1 | 0.46024990  | -0.02528495 2.55551243  |
| 1         | -3.95905018 | -1.09958494 | 1.46901250  | 1 | 0.19284993  | -0.36558497 -0.65458745 |
| 1         | -2.01605010 | -2.85828495 | 0.86451250  | 1 | 1.37114990  | -2.44318485 -0.86008745 |
| 1         | -1.17815006 | -2.34258485 | -1.65348744 | 1 | 0.28884989  | -3.06368494 0.41351250  |
| 1         | -2.60914993 | -0.26948494 | -2.58738756 | 6 | 2.94374990  | -0.19498493 -0.77328748 |
| 6         | -0.17995009 | 2.32681513  | 1.01381254  | 1 | 2.09065008  | 0.80981505 0.95191252   |
| 6         | 0.05994993  | 2.21611500  | -0.38048750 | 1 | -3.24755001 | 2.70441508 -0.25398749  |
| 6         | -1.18965006 | 2.33481503  | -1.04638743 | 1 | -4.35335016 | 0.47271508 -0.67088747  |
| 6         | -2.19425011 | 2.54321504  | -0.06448749 | 1 | 3.05805016  | -0.59408498 1.33681250  |
| 6         | -1.57455003 | 2.52621508  | 1.20711255  | 6 | 4.06754971  | 0.83681506 -0.86698747  |
| 1         | -2.07185006 | 2.67181516  | 2.15961242  | 1 | 2.17254972  | 0.01981506 -1.52308750  |
| 1         | 0.56864989  | 2.31981516  | 1.79621255  | 1 | 3.34284973  | -1.18598485 -1.01048744 |
| 1         | 1.02324986  | 2.09281516  | -0.85978746 | 1 | 4.85154963  | 0.63361502 -0.13248751  |
| 1         | -1.34105015 | 2.31101513  | -2.11848760 | 1 | 3.69324970  | 1.84851515 -0.68098748  |
| 40        | -1.30395007 | 0.21201506  | 0.26451251  | 1 | 4.52654982  | 0.82711506 -1.85718751  |
| 6         | 2.31624985  | -0.20918493 | 0.62171251  | 1 | 2.03294992  | -2.98128486 0.68481255  |

I-5

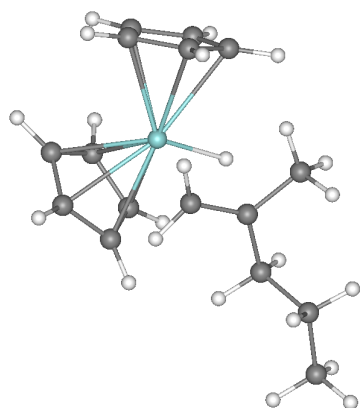

|                                             |                             |
|---------------------------------------------|-----------------------------|
| Zero-point vibrational energy               | 907054.2 (Joules/Mol)       |
|                                             | 216.79116 (Kcal/Mol)        |
| Zero-point correction                       | 0.345479 (Hartree/Particle) |
| Thermal correction to Energy                | 0.364444                    |
| Thermal correction to Enthalpy              | 0.365388                    |
| Thermal correction to Gibbs Free Energy     | 0.296641                    |
| Sum of electronic and zero-point Energies   | -4163.535388                |
| Sum of electronic and thermal Energies      | -4163.516423                |
| Sum of electronic and thermal Enthalpies    | -4163.515479                |
| Sum of electronic and thermal Free Energies | -4163.584225                |

| cartesian |             |             |             |   |                                     |
|-----------|-------------|-------------|-------------|---|-------------------------------------|
| 6         | -2.15187001 | -2.20005250 | 0.61726499  | 6 | 0.63773000 -0.43695250 1.57796502   |
| 6         | -1.95137000 | -2.18965244 | -0.78273499 | 6 | 1.39903009 -0.78105253 0.50266498   |
| 6         | -2.91267014 | -1.31425250 | -1.35593498 | 6 | 1.43203008 -2.18635249 -0.02413500  |
| 6         | -3.71497011 | -0.79975253 | -0.30983499 | 1 | 0.11682999 -1.20715249 2.14896512   |
| 6         | -3.23497009 | -1.32505250 | 0.91786498  | 1 | 0.77803004 0.53164750 2.05506492    |
| 1         | -3.65877008 | -1.14295256 | 1.89846504  | 1 | -0.47057000 -0.03665251 -1.50003505 |
| 1         | -1.60687006 | -2.79745245 | 1.33836496  | 1 | 1.35413003 -2.19615245 -1.11523497  |
| 1         | -1.20687008 | -2.74975252 | -1.33373499 | 1 | 2.40063000 -2.62845230 0.23406500   |
| 1         | -3.01606989 | -1.09665251 | -2.41163492 | 1 | 0.65513003 -2.81655240 0.41156501   |
| 6         | -0.53276998 | 2.48724747  | 0.24736500  | 1 | 2.09852982 0.28024748 -1.21043503   |
| 6         | -1.14636993 | 2.38504767  | -1.02803504 | 1 | 2.20602989 1.19084752 0.30546501    |
| 6         | -2.53337002 | 2.16574764  | -0.82003498 | 1 | -3.74057007 2.03954744 1.06326497   |
| 6         | -2.77747011 | 2.15674758  | 0.58216500  | 1 | -4.54946995 -0.11965252 -0.42493498 |
| 6         | -1.54136992 | 2.35554767  | 1.23866498  | 6 | 3.81162977 -0.22355250 0.01256500   |
| 1         | -1.39446998 | 2.40794754  | 2.31166506  | 6 | 4.75342989 0.85994744 -0.50893497   |
| 1         | 0.51682997  | 2.67984748  | 0.42956501  | 1 | 3.98732996 -1.15365255 -0.53543502  |
| 1         | -0.65206999 | 2.48264766  | -1.98463511 | 1 | 4.02022982 -0.42635250 1.06836498   |
| 1         | -3.28046989 | 2.05904746  | -1.59703505 | 1 | 5.79442978 0.54634750 -0.41203499   |

|    |             |            |             |   |            |            |             |
|----|-------------|------------|-------------|---|------------|------------|-------------|
| 40 | -1.41936994 | 0.13664749 | 0.05176500  | 1 | 4.63103008 | 1.79194748 | 0.04936500  |
| 6  | 2.33723021  | 0.20134750 | -0.14283499 | 1 | 4.56253004 | 1.06974745 | -1.56483495 |

## I-6

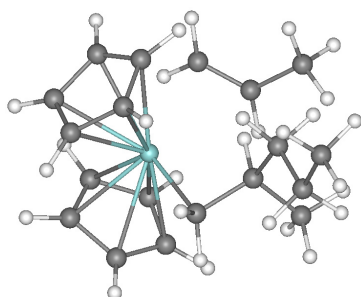

|                                             |                             |
|---------------------------------------------|-----------------------------|
| Zero-point vibrational energy               | 1137201.0 (Joules/Mol)      |
|                                             | 271.79755 (Kcal/Mol)        |
| Zero-point correction                       | 0.433137 (Hartree/Particle) |
| Thermal correction to Energy                | 0.456374                    |
| Thermal correction to Enthalpy              | 0.457318                    |
| Thermal correction to Gibbs Free Energy     | 0.380895                    |
| Sum of electronic and zero-point Energies   | -4281.331907                |
| Sum of electronic and thermal Energies      | -4281.308670                |
| Sum of electronic and thermal Enthalpies    | -4281.307725                |
| Sum of electronic and thermal Free Energies | 4281.384149                 |

## cartesian

|   |             |             |             |   |             |             |             |
|---|-------------|-------------|-------------|---|-------------|-------------|-------------|
| 6 | 0.64018160  | -0.72293872 | -2.39606524 | 6 | -1.77121830 | -1.76503873 | 1.06543469  |
| 6 | 0.74558163  | -1.95013881 | -1.69546533 | 1 | -0.60611838 | 0.81356132  | 1.17053473  |
| 6 | 2.12268162  | -2.22893882 | -1.50486529 | 1 | -0.57471842 | 1.04966140  | -0.58036530 |
| 6 | 2.87168169  | -1.16253877 | -2.06256533 | 1 | -3.09471846 | 0.68496132  | 1.14333475  |
| 6 | 1.94948149  | -0.23413870 | -2.62066531 | 1 | -2.98331833 | 1.04776120  | -0.57316530 |
| 1 | 2.20928168  | 0.66736132  | -3.16396523 | 6 | 2.82458162  | 2.22926116  | -0.47336531 |
| 1 | -0.28211838 | -0.24603869 | -2.70456529 | 6 | 1.59028161  | 2.68606114  | -0.76936531 |
| 1 | -0.07981843 | -2.57683873 | -1.37976527 | 6 | 0.77818161  | 3.56086135  | 0.13303469  |
| 1 | 2.53058171  | -3.11223865 | -1.03006530 | 1 | 3.44348168  | 1.73076129  | -1.22106528 |
| 1 | 3.95278168  | -1.09173870 | -2.09446526 | 1 | 3.30388165  | 2.51516128  | 0.45903468  |
| 6 | 2.20478153  | 0.35146132  | 2.29093480  | 1 | 1.17118168  | 2.47206116  | -1.75426531 |
| 6 | 1.33968163  | -0.76603872 | 2.33343458  | 1 | -0.24421841 | 3.19166136  | 0.24093468  |
| 6 | 2.00528169  | -1.85613871 | 1.71523476  | 1 | 1.23748159  | 3.66266131  | 1.11773467  |
| 6 | 3.30908155  | -1.42113876 | 1.34023476  | 1 | 0.71128160  | 4.55596113  | -0.32006532 |
| 6 | 3.43018174  | -0.06283869 | 1.69093466  | 1 | -1.88081837 | -1.37403870 | 2.08433461  |
| 1 | 4.31238174  | 0.54866129  | 1.54293466  | 1 | -2.59981823 | -2.45513868 | 0.89023471  |
| 1 | 1.98848152  | 1.33786130  | 2.68533468  | 1 | -0.84371835 | -2.34813881 | 1.02523470  |

|    |             |             |             |   |             |             |             |
|----|-------------|-------------|-------------|---|-------------|-------------|-------------|
| 1  | 0.34248161  | -0.78903872 | 2.75053477  | 6 | -4.34901857 | -0.54603869 | -0.11156531 |
| 1  | 1.61108160  | -2.85903883 | 1.60283470  | 1 | -4.50321865 | -1.29843879 | 0.66803467  |
| 1  | 4.07468176  | -2.02573872 | 0.87043470  | 1 | -4.26681852 | -1.08933878 | -1.06096530 |
| 40 | 1.64498162  | -0.20613870 | -0.10806531 | 6 | -5.56041861 | 0.38546133  | -0.15436532 |
| 1  | -1.74681830 | -1.05983877 | -0.95936531 | 1 | -5.67401838 | 0.91996127  | 0.79333472  |
| 6  | -0.52931839 | 0.27396131  | 0.21353470  | 1 | -6.48321867 | -0.16943869 | -0.33706534 |
| 6  | -1.76701832 | -0.62093866 | 0.04793468  | 1 | -5.45461845 | 1.13116121  | -0.94766527 |
| 6  | -3.05061841 | 0.22176132  | 0.14763469  |   |             |             |             |

## TS-5

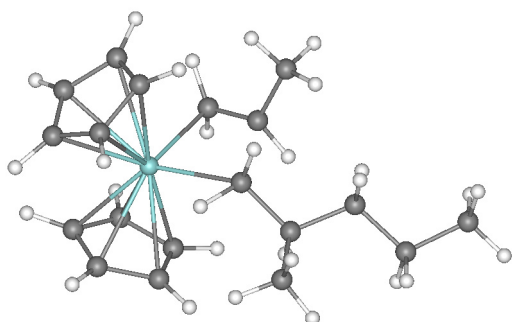

|                                             |                             |
|---------------------------------------------|-----------------------------|
| Zero-point vibrational energy               | 1142195.1 (Joules/Mol)      |
|                                             | 272.99118 (Kcal/Mol)        |
| Zero-point correction                       | 0.435039 (Hartree/Particle) |
| Thermal correction to Energy                | 0.456539                    |
| Thermal correction to Enthalpy              | 0.457483                    |
| Thermal correction to Gibbs Free Energy     | 0.385706                    |
| Sum of electronic and zero-point Energies   | -4281.316222                |
| Sum of electronic and thermal Energies      | -4281.294723                |
| Sum of electronic and thermal Enthalpies    | -4281.293778                |
| Sum of electronic and thermal Free Energies | -4281.365555                |

| cartesian |             |             |             |   |             |             |             |
|-----------|-------------|-------------|-------------|---|-------------|-------------|-------------|
| 6         | -1.12747550 | -2.19465518 | 1.37963676  | 6 | 2.86632442  | 0.22094485  | -0.23706324 |
| 6         | -1.11807537 | -2.56295514 | 0.01573674  | 1 | -0.33147544 | -0.31345513 | -1.40266323 |
| 6         | -2.44707537 | -2.47755527 | -0.47616327 | 1 | 0.55252457  | 1.17614484  | -1.16566324 |
| 6         | -3.28457546 | -2.09325528 | 0.60683674  | 6 | 4.17112446  | -0.57855511 | -0.16076325 |
| 6         | -2.47107553 | -1.91155517 | 1.74913681  | 1 | 2.97302437  | 1.01294482  | -0.99206322 |
| 1         | -2.81827545 | -1.62645519 | 2.73443675  | 1 | 2.73262453  | 0.72894490  | 0.72443676  |
| 1         | -0.26467544 | -2.16045523 | 2.03463674  | 6 | -1.07837546 | 0.91314489  | 2.07633662  |
| 1         | -0.24807543 | -2.86075521 | -0.55646324 | 6 | 0.15002453  | 1.09234476  | 1.39653683  |
| 1         | -2.77117538 | -2.71545529 | -1.48216319 | 6 | 0.59272456  | 2.49244475  | 1.04453683  |
| 1         | -4.35977554 | -1.97065520 | 0.56863672  | 1 | -1.10897541 | 0.14814484  | 2.84503675  |
| 6         | -2.21507549 | 2.01844478  | -1.22686327 | 1 | -1.65577543 | 1.80604482  | 2.29633665  |

|    |             |             |             |   |             |             |             |
|----|-------------|-------------|-------------|---|-------------|-------------|-------------|
| 6  | -2.76357555 | 0.95504493  | -1.99706328 | 1 | 0.93782461  | 0.38484484  | 1.63933682  |
| 6  | -3.86907530 | 0.42854485  | -1.28976321 | 1 | -0.24767545 | 3.09404492  | 0.68923676  |
| 6  | -4.00077534 | 1.15324485  | -0.07426326 | 1 | 0.96042454  | 2.95454478  | 1.96723676  |
| 6  | -2.99217558 | 2.15004492  | -0.05186326 | 6 | 1.83742464  | -1.35315514 | -1.91656315 |
| 1  | -2.86097527 | 2.89784479  | 0.71873671  | 6 | 5.31352472  | 0.25964484  | 0.41223672  |
| 1  | -1.37997544 | 2.64464474  | -1.51506317 | 1 | 4.45212460  | -0.93475515 | -1.15566325 |
| 1  | -2.41227531 | 0.62124485  | -2.96646333 | 1 | 4.01682472  | -1.46895516 | 0.46113673  |
| 1  | -4.50637531 | -0.38195515 | -1.62056315 | 1 | 0.94652462  | -1.90975523 | -2.22536325 |
| 1  | -4.76437521 | 1.00214481  | 0.67933673  | 1 | 2.66242456  | -2.06555510 | -1.85246325 |
| 40 | -1.83397543 | -0.11885515 | 0.08243674  | 1 | 5.09392452  | 0.57894486  | 1.43523681  |
| 1  | 1.50122464  | -1.38195515 | 0.20833674  | 1 | 5.48052454  | 1.15724480  | -0.19046324 |
| 6  | 0.34952462  | 0.22594485  | -0.66586328 | 1 | 6.24682474  | -0.30655515 | 0.43203673  |
| 6  | 1.62582457  | -0.62415510 | -0.57836324 | 1 | 2.06992435  | -0.63405514 | -2.70936322 |
|    |             |             |             | 1 | 1.39792454  | 2.52794480  | 0.31143674  |

## TS-6

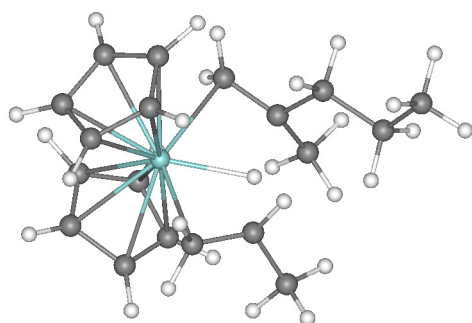

|                                             |                             |
|---------------------------------------------|-----------------------------|
| Zero-point vibrational energy               | 1127819.9 (Joules/Mol)      |
|                                             | 269.55543 (Kcal/Mol)        |
| Zero-point correction                       | 0.429564 (Hartree/Particle) |
| Thermal correction to Energy                | 0.451801                    |
| Thermal correction to Enthalpy              | 0.452745                    |
| Thermal correction to Gibbs Free Energy     | 0.379531                    |
| Sum of electronic and zero-point Energies   | -4281.305669                |
| Sum of electronic and thermal Energies      | -4281.283432                |
| Sum of electronic and thermal Enthalpies    | -4281.282488                |
| Sum of electronic and thermal Free Energies | -4281.355702                |

| cartesian |             |             |             |   |             |             |             |
|-----------|-------------|-------------|-------------|---|-------------|-------------|-------------|
| 6         | -1.58554292 | -2.32785296 | 0.35126126  | 6 | 1.50915718  | -1.61075306 | 1.63716125  |
| 6         | -2.44114280 | -1.98185301 | -0.72603869 | 1 | -0.40554282 | -0.24655306 | 2.84546113  |
| 6         | -3.44764280 | -1.12305307 | -0.23593874 | 1 | 0.10305721  | 1.42594695  | 2.31916118  |
| 6         | -3.24044275 | -0.96305311 | 1.16486132  | 1 | 0.57195717  | -0.42385307 | -0.20563874 |
| 6         | -2.10634279 | -1.72205305 | 1.52476132  | 1 | 1.99595714  | -2.12135315 | 0.80676126  |

|    |             |             |             |   |             |             |             |
|----|-------------|-------------|-------------|---|-------------|-------------|-------------|
| 1  | -1.72804284 | -1.85035300 | 2.52926111  | 1 | 2.22965717  | -1.56965303 | 2.46296120  |
| 1  | -0.74154282 | -3.00475311 | 0.30076125  | 1 | 0.65655714  | -2.20245314 | 1.97416127  |
| 1  | -2.36164284 | -2.34525299 | -1.74103868 | 1 | 1.81465721  | 1.58964694  | 0.29606125  |
| 1  | -3.86184287 | -0.39085308 | 1.84246123  | 6 | -0.68984282 | -0.10875309 | -2.38213873 |
| 6  | -1.13614273 | 2.57264686  | -0.95963871 | 6 | 0.53785723  | -0.49445310 | -1.84033871 |
| 6  | -2.46724272 | 2.10384703  | -1.16813874 | 6 | 1.00645709  | -1.92705297 | -1.98303878 |
| 6  | -3.08874273 | 2.00814700  | 0.09886126  | 1 | -0.78724283 | 0.88284695  | -2.80263877 |
| 6  | -2.13734293 | 2.34734702  | 1.09026122  | 1 | -1.32654285 | -0.86455309 | -2.82593894 |
| 6  | -0.93804282 | 2.72634697  | 0.42106125  | 1 | 1.32045722  | 0.26574692  | -1.82763875 |
| 1  | -0.03304282 | 3.09274697  | 0.88876128  | 1 | 1.77745724  | -2.20915294 | -1.26693869 |
| 1  | -0.40554282 | 2.79574704  | -1.72793877 | 1 | 0.17175716  | -2.62615299 | -1.90153873 |
| 1  | -2.94044280 | 1.91814697  | -2.12423873 | 1 | 1.42975712  | -2.03415298 | -2.98693895 |
| 1  | -2.31134272 | 2.37604690  | 2.15876126  | 1 | -4.11474276 | 1.71444690  | 0.28016126  |
| 40 | -1.32024288 | 0.19504693  | 0.02556126  | 1 | -4.25384283 | -0.69335306 | -0.81753874 |
| 6  | 2.23335719  | 0.76174688  | 0.88146126  | 1 | 3.04755735  | -0.45135310 | -0.73483872 |
| 1  | 2.62815714  | 1.21694696  | 1.79916131  | 1 | 3.91605735  | -0.58525312 | 0.77956128  |
| 6  | 3.40225720  | 0.12594692  | 0.12526126  | 6 | 4.39515686  | 1.18694699  | -0.34983876 |
| 6  | 0.06315720  | 0.36854693  | 2.08646107  | 1 | 5.24865723  | 0.72944689  | -0.85323870 |
| 6  | 1.11035728  | -0.17925307 | 1.32936132  | 1 | 4.77655697  | 1.77044690  | 0.49266124  |
|    |             |             |             | 1 | 3.92405725  | 1.88244700  | -1.05123878 |

### S1.3. Me<sub>2</sub>AlH reaction profile

#### I-OH

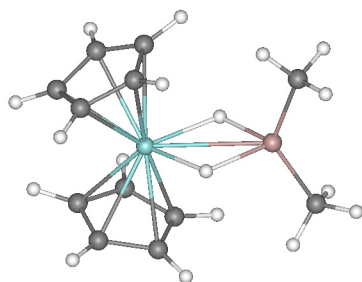

|                                             |                             |
|---------------------------------------------|-----------------------------|
| Zero-point vibrational energy               | 679540.8 (Joules/Mol)       |
|                                             | 162.41414 (Kcal/Mol)        |
| Zero-point correction                       | 0.258823 (Hartree/Particle) |
| Thermal correction to Energy                | 0.274570                    |
| Thermal correction to Enthalpy              | 0.275514                    |
| Thermal correction to Gibbs Free Energy     | 0.214702                    |
| Sum of electronic and zero-point Energies   | -4250.669473                |
| Sum of electronic and thermal Energies      | -4250.653726                |
| Sum of electronic and thermal Enthalpies    | -4250.652782                |
| Sum of electronic and thermal Free Energies | -4250.713595                |

| cartesian |             |             |             |    |             |             |             |
|-----------|-------------|-------------|-------------|----|-------------|-------------|-------------|
| 6         | 1.82288432  | -1.90424991 | 1.15558445  | 1  | 3.58228421  | 1.38665009  | 0.31368440  |
| 6         | 2.63388443  | -1.61284995 | 0.02818439  | 1  | 2.37378430  | 1.76175010  | -2.06411576 |
| 6         | 1.87768435  | -1.89014995 | -1.14011562 | 1  | -0.14301562 | 2.61045003  | -1.59161556 |
| 6         | 0.60298437  | -2.37514997 | -0.73471558 | 1  | -0.49281561 | 2.73134995  | 1.07608438  |
| 6         | 0.56868434  | -2.38364983 | 0.68458438  | 40 | 0.72808439  | 0.00415001  | -0.00681561 |
| 1         | -0.25921559 | -2.71374989 | 1.29998446  | 1  | -0.88371557 | -0.02334999 | 1.09408438  |
| 1         | 2.11988449  | -1.80964994 | 2.19408417  | 1  | -0.87391561 | -0.03134999 | -1.12851560 |
| 1         | 3.65698433  | -1.25914991 | 0.05418439  | 13 | -2.28861570 | -0.03524999 | -0.02131561 |
| 1         | 2.22418427  | -1.78444993 | -2.16191578 | 6  | -3.11041570 | 1.72725010  | 0.00058439  |
| 1         | -0.19281563 | -2.69914985 | -1.39391565 | 6  | -3.09901571 | -1.80065000 | 0.00608439  |
| 6         | 2.55578423  | 1.69675004  | 0.16368438  | 1  | -4.12461567 | 1.69525003  | -0.41031560 |
| 6         | 1.91688442  | 1.89345002  | -1.08991563 | 1  | -3.20421576 | 2.10275006  | 1.02638435  |
| 6         | 0.59158438  | 2.34695005  | -0.84061557 | 1  | -2.55761576 | 2.48045015  | -0.57031560 |
| 6         | 0.40728438  | 2.41094995  | 0.56558442  | 1  | -3.87501574 | -1.88974988 | -0.76151562 |
| 6         | 1.62208438  | 2.00475001  | 1.18498445  | 1  | -2.39351559 | -2.62214994 | -0.15121561 |
| 1         | 1.80838442  | 1.96175003  | 2.25228429  | 1  | -3.59481573 | -1.97994995 | 0.96688437  |

**I-1H**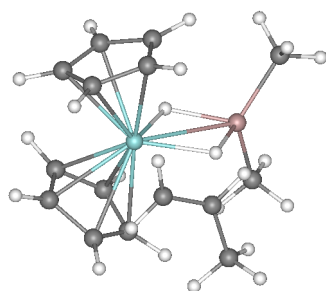

|                                             |                             |
|---------------------------------------------|-----------------------------|
| Zero-point vibrational energy               | 901973.9 (Joules/Mol)       |
|                                             | 215.57695 (Kcal/Mol)        |
| Zero-point correction                       | 0.343544 (Hartree/Particle) |
| Thermal correction to Energy                | 0.364822                    |
| Thermal correction to Enthalpy              | 0.365766                    |
| Thermal correction to Gibbs Free Energy     | 0.293380                    |
| Sum of electronic and zero-point Energies   | -4368.459600                |
| Sum of electronic and thermal Energies      | -4368.438321                |
| Sum of electronic and thermal Enthalpies    | -4368.437377                |
| Sum of electronic and thermal Free Energies | -4368.509764                |

## cartesian

|    |             |             |             |    |             |             |             |
|----|-------------|-------------|-------------|----|-------------|-------------|-------------|
| 6  | -1.34009516 | -2.25256109 | 0.69904149  | 1  | 0.72410482  | 0.94093907  | 1.27554142  |
| 6  | -2.24829531 | -1.43406093 | 1.40644145  | 1  | 1.06780481  | 0.04693904  | -0.64055860 |
| 6  | -1.51449513 | -0.74176097 | 2.41314149  | 13 | 2.25710487  | 0.75943905  | 0.42284143  |
| 6  | -0.15979518 | -1.14236093 | 2.32164145  | 6  | 2.86430478  | 2.47483897  | -0.27495858 |
| 6  | -0.04059519 | -2.05366111 | 1.23734140  | 6  | 3.35040474  | -0.62576097 | 1.24874151  |
| 1  | 0.86580479  | -2.55826116 | 0.92534137  | 1  | 3.95330477  | 2.49063897  | -0.38585857 |
| 1  | -1.59869516 | -2.93856096 | -0.09625857 | 1  | 2.44090486  | 2.71153903  | -1.25745857 |
| 1  | -3.31699514 | -1.37576091 | 1.23944151  | 1  | 2.61120486  | 3.30493903  | 0.39504144  |
| 1  | -1.92439520 | -0.05916096 | 3.14704156  | 1  | 4.08660460  | -0.18786095 | 1.93164146  |
| 1  | 0.64330482  | -0.81586093 | 2.96924138  | 1  | 2.79580474  | -1.38046098 | 1.81474149  |
| 6  | -1.45969522 | 2.06483889  | -1.24815857 | 1  | 3.92920494  | -1.16066098 | 0.48554143  |
| 6  | -2.63249516 | 1.46653903  | -0.69585860 | 6  | -1.34509516 | -1.00266099 | -2.29835844 |
| 6  | -2.63099527 | 1.72253907  | 0.69644141  | 6  | -0.00389519 | -1.13206100 | -2.40525866 |
| 6  | -1.44629514 | 2.42663884  | 1.01614141  | 6  | 0.77520478  | -2.38176107 | -2.12525845 |
| 6  | -0.73329520 | 2.65663886  | -0.19715858 | 1  | -1.97279513 | -1.83566093 | -1.99405861 |
| 1  | 0.20570481  | 3.18853903  | -0.29015857 | 1  | -1.84909523 | -0.14706096 | -2.73315859 |
| 1  | -1.17539525 | 2.07813907  | -2.29375863 | 1  | 1.11290479  | -2.79196095 | -3.08295846 |
| 1  | -3.42239523 | 0.96793908  | -1.24415851 | 1  | 1.66930485  | -2.17716098 | -1.53135860 |
| 1  | -3.39969516 | 1.41923904  | 1.39594150  | 1  | 0.17200482  | -3.14456105 | -1.62995851 |
| 1  | -1.14799523 | 2.76893902  | 1.99904144  | 1  | 0.55240482  | -0.30896097 | -2.85175848 |
| 40 | -0.71489519 | 0.15933904  | 0.23614143  |    |             |             |             |

**TS-1H**

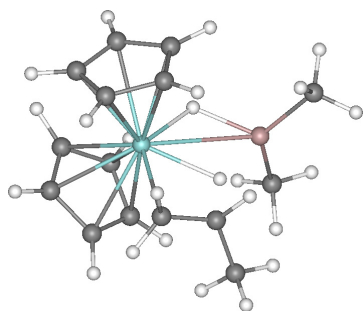

|                                             |                             |
|---------------------------------------------|-----------------------------|
| Zero-point vibrational energy               | 898825.0 (Joules/Mol)       |
|                                             | 214.82433 (Kcal/Mol)        |
| Zero-point correction                       | 0.342344 (Hartree/Particle) |
| Thermal correction to Energy                | 0.362787                    |
| Thermal correction to Enthalpy              | 0.363732                    |
| Thermal correction to Gibbs Free Energy     | 0.294205                    |
| Sum of electronic and zero-point Energies   | -4368.451149                |
| Sum of electronic and thermal Energies      | -4368.430706                |
| Sum of electronic and thermal Enthalpies    | -4368.429762                |
| Sum of electronic and thermal Free Energies | -4368.499289                |

| cartesian |             |             |             |    |                                     |
|-----------|-------------|-------------|-------------|----|-------------------------------------|
| 6         | -0.01282695 | -2.32699752 | -0.68525368 | 1  | -1.18342686 0.97610247 2.24504638   |
| 6         | 0.60637307  | -1.82679772 | -1.86725354 | 6  | -0.81252682 -0.03589760 2.07914639  |
| 6         | 1.98907316  | -1.69919765 | -1.61625361 | 6  | 0.54927307 -0.26239762 2.33864641   |
| 6         | 2.23827291  | -2.12579751 | -0.27905366 | 6  | -1.83982694 -1.13259768 2.25014639  |
| 6         | 1.00487304  | -2.54159737 | 0.27774635  | 1  | -1.46282685 -2.09289742 1.89234650  |
| 1         | 0.87027311  | -2.97439742 | 1.25984645  | 1  | -2.78182697 -0.90679753 1.74674642  |
| 1         | -1.06352687 | -2.56959748 | -0.57625365 | 1  | -2.04222703 -1.22899771 3.32114625  |
| 1         | 0.10497306  | -1.59549761 | -2.79825377 | 1  | -1.00742686 0.15550239 0.55124635   |
| 1         | 2.73257303  | -1.35269761 | -2.32305360 | 1  | 0.85097313 -1.25769770 2.64714622   |
| 1         | 3.20577312  | -2.17969751 | 0.20534635  | 1  | 1.11847305 0.55200243 2.77084637    |
| 6         | 2.20667291  | 1.64550233  | -1.40995359 | 13 | -1.98312676 0.70570242 -0.98735368  |
| 6         | 3.11117291  | 1.08690238  | -0.46805364 | 1  | -0.37092692 0.53270245 -1.52625358  |
| 6         | 2.68677306  | 1.46050239  | 0.82624632  | 6  | -2.44362688 2.54780269 -0.56675369  |
| 6         | 1.52917314  | 2.28320265  | 0.68634635  | 6  | -3.10442710 -0.77159756 -1.57225358 |
| 6         | 1.25117314  | 2.41340256  | -0.69055367 | 1  | -3.41822696 -1.40669763 -0.73495370 |
| 1         | 0.44477305  | 2.99010253  | -1.12675357 | 1  | -2.60292697 -1.42229772 -2.29655361 |
| 1         | 2.26307297  | 1.55000234  | -2.48715377 | 1  | -4.02272701 -0.40789762 -2.04455352 |
| 1         | 3.97527289  | 0.47700238  | -0.70035368 | 1  | -3.46752691 2.63430262 -0.18885365  |
| 1         | 3.18277311  | 1.20160234  | 1.75314641  | 1  | -2.39362693 3.17780256 -1.46325350  |
| 1         | 0.98457313  | 2.76110268  | 1.49274647  | 1  | -1.78012693 3.00200248 0.17744637   |
| 40        | 0.88737309  | -0.03519760 | -0.11235365 |    |                                     |

I-2H\_a

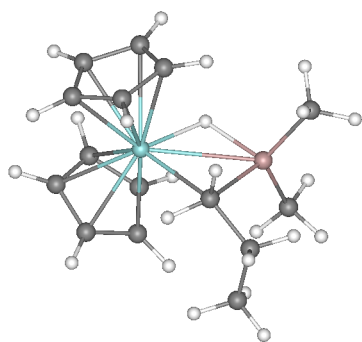

|                                             |                             |
|---------------------------------------------|-----------------------------|
| Zero-point vibrational energy               | 909914.3 (Joules/Mol)       |
|                                             | 217.47475 (Kcal/Mol)        |
| Zero-point correction                       | 0.346568 (Hartree/Particle) |
| Thermal correction to Energy                | 0.367351                    |
| Thermal correction to Enthalpy              | 0.368295                    |
| Thermal correction to Gibbs Free Energy     | 0.296995                    |
| Sum of electronic and zero-point Energies   | -4368.473827                |
| Sum of electronic and thermal Energies      | -4368.453044                |
| Sum of electronic and thermal Enthalpies    | -4368.452100                |
| Sum of electronic and thermal Free Energies | -4368.523400                |

| cartesian |             |             |             |    |             |             |             |  |  |  |  |
|-----------|-------------|-------------|-------------|----|-------------|-------------|-------------|--|--|--|--|
| 6         | 1.72529995  | -1.90310001 | -1.28160000 | 1  | 1.31099999  | 2.03509998  | 2.37949991  |  |  |  |  |
| 6         | 0.32040000  | -2.05739999 | -1.42200005 | 1  | 3.35050011  | 0.39340001  | 1.75979996  |  |  |  |  |
| 6         | -0.21160001 | -2.38599992 | -0.15050000 | 13 | -1.96010005 | 0.78479999  | -0.87309998 |  |  |  |  |
| 6         | 0.86900002  | -2.45919991 | 0.77329999  | 6  | -3.03040004 | -0.60869998 | -1.71840000 |  |  |  |  |
| 6         | 2.06450009  | -2.16669989 | 0.07450000  | 6  | -2.35290003 | 2.69519997  | -0.94010001 |  |  |  |  |
| 40        | 0.71950001  | -0.06530000 | 0.05400000  | 1  | -3.10319996 | -0.39060000 | -2.79150009 |  |  |  |  |
| 6         | -1.32449996 | 0.47830001  | 1.20360005  | 1  | -4.06150007 | -0.61229998 | -1.34549999 |  |  |  |  |
| 1         | -0.28830001 | 0.51840001  | -1.46599996 | 1  | -2.65310001 | -1.63259995 | -1.63189995 |  |  |  |  |
| 6         | 1.19640005  | 2.40479994  | 0.18160000  | 1  | -1.70850003 | 3.21180010  | -1.66190004 |  |  |  |  |
| 6         | 1.97529995  | 1.89250004  | -0.89469999 | 1  | -2.22569990 | 3.20449996  | 0.02230000  |  |  |  |  |
| 6         | 2.93700004  | 1.00590003  | -0.35479999 | 1  | -3.38240004 | 2.88269997  | -1.26259995 |  |  |  |  |
| 6         | 2.75119996  | 0.95719999  | 1.05509996  | 1  | -0.66960001 | -0.19149999 | 1.82490003  |  |  |  |  |
| 6         | 1.68630004  | 1.83959997  | 1.38150001  | 1  | -1.11090004 | 1.49710000  | 1.54400003  |  |  |  |  |
| 1         | -1.25000000 | -2.59030008 | 0.07240000  | 6  | -2.75860000 | 0.13290000  | 1.69120002  |  |  |  |  |
| 1         | 0.79329997  | -2.71860003 | 1.82369995  | 6  | -3.09960008 | -1.35350001 | 1.68700004  |  |  |  |  |
| 1         | -0.24360000 | -1.94589996 | -2.33949995 | 1  | -3.50760007 | 0.68650001  | 1.10510004  |  |  |  |  |
| 1         | 2.42000008  | -1.67019999 | -2.07949996 | 1  | -4.07049990 | -1.51880002 | 2.15869999  |  |  |  |  |
| 1         | 3.06279993  | -2.15799999 | 0.49439999  | 1  | -2.35770011 | -1.92690003 | 2.25340009  |  |  |  |  |
| 1         | 3.69260001  | 0.46810001  | -0.91360003 | 1  | -3.15809989 | -1.75790000 | 0.67430001  |  |  |  |  |
| 1         | 1.85769999  | 2.15100002  | -1.93970001 | 1  | -2.86409998 | 0.52730000  | 2.70650005  |  |  |  |  |
| 1         | 0.38270000  | 3.11509991  | 0.08990000  |    |             |             |             |  |  |  |  |

**I-2H\_bi**

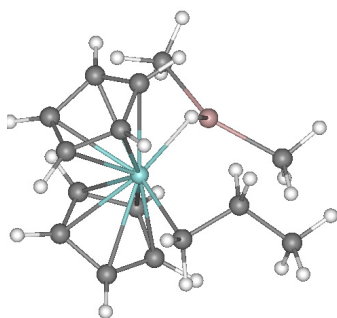

|                                             |                             |
|---------------------------------------------|-----------------------------|
| Zero-point vibrational energy               | 906854.6 (Joules/Mol)       |
|                                             | 216.74345 (Kcal/Mol)        |
| Zero-point correction                       | 0.345403 (Hartree/Particle) |
| Thermal correction to Energy                | 0.366043                    |
| Thermal correction to Enthalpy              | 0.366987                    |
| Thermal correction to Gibbs Free Energy     | 0.295655                    |
| Sum of electronic and zero-point Energies   | -4368.459386                |
| Sum of electronic and thermal Energies      | -4368.438745                |
| Sum of electronic and thermal Enthalpies    | -4368.437801                |
| Sum of electronic and thermal Free Energies | -4368.509134                |

| cartesian |             |             |             |    |             |                         |
|-----------|-------------|-------------|-------------|----|-------------|-------------------------|
| 6         | 2.64969993  | -0.19610000 | -1.34940004 | 1  | -0.94970000 | -0.18770000 -1.23099995 |
| 6         | 2.84920001  | -1.00440001 | -0.20200001 | 1  | -0.07820000 | 1.69959998 -1.18579996  |
| 6         | 1.93610001  | -2.09220004 | -0.27320001 | 13 | -2.54719996 | -0.40930000 -0.82999998 |
| 6         | 1.14950001  | -1.93320000 | -1.43529999 | 6  | -3.50690007 | 1.27269995 -0.75940001  |
| 6         | 1.59080005  | -0.75349998 | -2.10260010 | 6  | -3.10229993 | -2.25460005 -1.03009999 |
| 1         | 1.19970000  | -0.36989999 | -3.03719997 | 1  | -3.91020012 | 1.53139997 -1.74510002  |
| 1         | 3.20810008  | 0.69520003  | -1.60259998 | 1  | -2.87290001 | 2.11019993 -0.44830000  |
| 1         | 3.58999991  | -0.83929998 | 0.57090002  | 1  | -4.36439991 | 1.23380005 -0.07920000  |
| 1         | 1.85749996  | -2.90310001 | 0.44010001  | 1  | -2.31830001 | -2.96580005 -0.75070000 |
| 1         | 0.36289999  | -2.59780002 | -1.77119994 | 1  | -3.36610007 | -2.46880007 -2.07200003 |
| 6         | -0.93269998 | 0.73689997  | 2.04329991  | 1  | -3.99070001 | -2.48830009 -0.43430001 |
| 6         | 0.33199999  | 0.40419999  | 2.57329988  | 6  | 1.53610003  | 2.00580001 0.31240001   |
| 6         | 0.53619999  | -0.99030000 | 2.39129996  | 6  | 0.68260002  | 2.47779989 -0.85100001  |
| 6         | -0.61299998 | -1.53219998 | 1.76650000  | 6  | -0.16190000 | 3.72510004 -0.56980002  |
| 6         | -1.52830005 | -0.46529999 | 1.55780005  | 1  | 2.60570002  | 2.09949994 0.13890000   |
| 1         | -2.59759998 | -0.59469998 | 1.38429999  | 1  | 1.27349997  | 2.53020000 1.23160005   |
| 1         | -1.39800000 | 1.71589994  | 2.05399990  | 1  | -0.81349999 | 3.97119999 -1.41120005  |
| 1         | 1.02639997  | 1.08749998  | 3.04279995  | 1  | 0.49349999  | 4.57700014 -0.37799999  |
| 1         | 1.40840006  | -1.54849994 | 2.70860004  | 1  | -0.78490001 | 3.57859993 0.31760001   |
| 1         | -0.78829998 | -2.57529998 | 1.53240001  | 1  | 1.27880001  | 2.60310006 -1.75899994  |
| 40        | 0.56339997  | -0.02450000 | 0.07110000  |    |             |                         |

I-2H\_b'

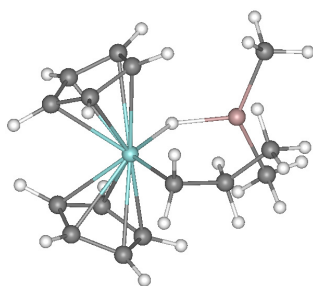

|                                             |                             |
|---------------------------------------------|-----------------------------|
| Zero-point vibrational energy               | 905923.6 (Joules/Mol)       |
|                                             | 216.52093 (Kcal/Mol)        |
| Zero-point correction                       | 0.345048 (Hartree/Particle) |
| Thermal correction to Energy                | 0.366394                    |
| Thermal correction to Enthalpy              | 0.367338                    |
| Thermal correction to Gibbs Free Energy     | 0.293828                    |
| Sum of electronic and zero-point Energies   | -4368.457077                |
| Sum of electronic and thermal Energies      | -4368.435731                |
| Sum of electronic and thermal Enthalpies    | -4368.434787                |
| Sum of electronic and thermal Free Energies | -4368.508297                |

| cartesian |             |             |             |   |             |             |
|-----------|-------------|-------------|-------------|---|-------------|-------------|
| 6         | 1.61150002  | 2.22346354  | -0.96474630 | 1 | -0.56909990 | 0.26316339  |
| 6         | 0.73910010  | 2.52486348  | 0.10855365  | 6 | -3.01130009 | -1.44233668 |
| 6         | 1.40260005  | 2.18386340  | 1.32305360  | 6 | -2.90100002 | 2.12356353  |
| 6         | 2.66899991  | 1.65826333  | 0.99275368  | 1 | -3.94039989 | 2.18856359  |
| 6         | 2.79369998  | 1.65926337  | -0.42564636 | 1 | -2.88540006 | 2.46436357  |
| 1         | 3.65649986  | 1.32926333  | -0.99184638 | 1 | -2.31590009 | 2.84106350  |
| 1         | 1.41420007  | 2.39876342  | -2.01374650 | 1 | -4.01639986 | -1.44163668 |
| 6         | 1.97640014  | -1.45163667 | 1.87145364  | 1 | -3.10739994 | -1.82073665 |
| 6         | 2.83360004  | -1.53673661 | 0.73545367  | 1 | -2.40919995 | -2.17403650 |
| 6         | 2.12980008  | -2.19403648 | -0.29904634 | 1 | 1.00670004  | 2.31126356  |
| 6         | 0.83320010  | -2.51463652 | 0.19035365  | 1 | -0.23899993 | 2.98516345  |
| 6         | 0.75530005  | -2.08463645 | 1.53735363  | 1 | 2.51539993  | -2.41993642 |
| 1         | -0.09449995 | -2.20953655 | 2.19725370  | 1 | 0.06090006  | -3.04223657 |
| 1         | 2.22889996  | -1.02233660 | 2.83315349  | 1 | 3.41669989  | 1.31476331  |
| 40        | 0.98760009  | 0.01606340  | 0.11495364  | 1 | 3.85529995  | -1.18223667 |
| 6         | -0.85069990 | 0.09866340  | -1.88674641 | 6 | -1.93679988 | -0.88433659 |
| 6         | 0.57500005  | -0.33483660 | -2.11134648 | 1 | -1.04089987 | 1.10876334  |
| 1         | -1.05419993 | 0.25426340  | -0.75354636 | 1 | -2.93810010 | -0.54663658 |
| 1         | 1.10590005  | 0.27906340  | -2.83504629 | 1 | -1.76719987 | -1.87233663 |
| 1         | 0.62890005  | -1.38323665 | -2.40484643 | 1 | -1.90659988 | -0.98933655 |
| 13        | -2.21210003 | 0.32096338  | 1.20055366  |   |             |             |

I-2H\_bo

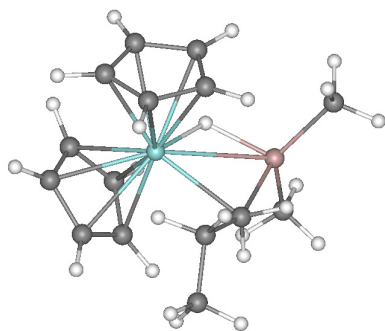

|                                             |                             |
|---------------------------------------------|-----------------------------|
| Zero-point vibrational energy               | 911044.0 (Joules/Mol)       |
|                                             | 217.74473 (Kcal/Mol)        |
| Zero-point correction                       | 0.346998 (Hartree/Particle) |
| Thermal correction to Energy                | 0.367848                    |
| Thermal correction to Enthalpy              | 0.368792                    |
| Thermal correction to Gibbs Free Energy     | 0.297628                    |
| Sum of electronic and zero-point Energies   | -4368.483495                |
| Sum of electronic and thermal Energies      | -4368.462645                |
| Sum of electronic and thermal Enthalpies    | -4368.461701                |
| Sum of electronic and thermal Free Energies | -4368.532865                |

| cartesian |             |             |             |   |                                     |
|-----------|-------------|-------------|-------------|---|-------------------------------------|
| 6         | -0.55215120 | 2.41029024  | -0.87821954 | 6 | 3.00974870 -1.20140982 1.56788039   |
| 6         | -1.86345124 | 1.94829011  | -1.19521952 | 6 | 2.94754887 2.07719016 0.41238046    |
| 6         | -2.61555123 | 1.90769017  | 0.00138044  | 1 | 2.33484888 -2.04440975 1.75418043   |
| 6         | -1.77455127 | 2.33789039  | 1.06358051  | 1 | 3.46884871 -0.94110984 2.52788043   |
| 6         | -0.51125121 | 2.67649031  | 0.51238048  | 1 | 3.82334900 -1.57660985 0.93598044   |
| 1         | 0.33714879  | 3.06689024  | 1.06008053  | 1 | 2.99124885 2.68329024 1.32518053    |
| 1         | 0.25014877  | 2.58599019  | -1.58461952 | 1 | 2.43634868 2.67869020 -0.34721953   |
| 1         | -2.23085117 | 1.69899011  | -2.18381953 | 1 | 3.98574877 1.96349013 0.08018044    |
| 1         | -2.05945110 | 2.44009018  | 2.10348034  | 6 | 0.13364878 -1.95320976 -2.86871958  |
| 6         | -0.70195121 | -2.23020983 | 0.92288047  | 6 | 1.15544879 -0.46440980 -1.04951954  |
| 6         | -1.89645123 | -2.08630967 | 0.16598044  | 6 | 0.08064878 -0.60950977 -2.13641953  |
| 6         | -2.76955128 | -1.22810984 | 0.87718046  | 1 | 0.13444880 0.22169019 -2.84261942   |
| 6         | -2.12215137 | -0.85060978 | 2.08648038  | 1 | 1.95484877 0.14599019 -1.49601960   |
| 6         | -0.85375124 | -1.48360980 | 2.12148046  | 1 | 1.57234883 -1.45730984 -0.84991950  |
| 1         | -0.12975122 | -1.41590989 | 2.92338061  | 1 | -0.99045122 -0.54990977 -1.77411962 |
| 1         | 0.14974877  | -2.84630966 | 0.66208047  | 1 | 0.04404879 -2.78300977 -2.16191959  |
| 1         | -2.11285114 | -2.56470966 | -0.78261954 | 1 | 1.09194875 -2.05330968 -3.38241959  |
| 1         | -2.54085112 | -0.22310981 | 2.86348057  | 1 | -3.76955128 -0.94680983 0.57228041  |
| 40        | -0.80635118 | 0.18589020  | 0.24208045  | 1 | -3.65475130 1.61749017 0.08918045   |
| 1         | 0.58164877  | 0.56099021  | 1.51158047  | 1 | -0.66545117 -2.03630972 -3.60831952 |
| 13        | 2.13734889  | 0.33889019  | 0.75908047  |   |                                     |

I-4H\_a

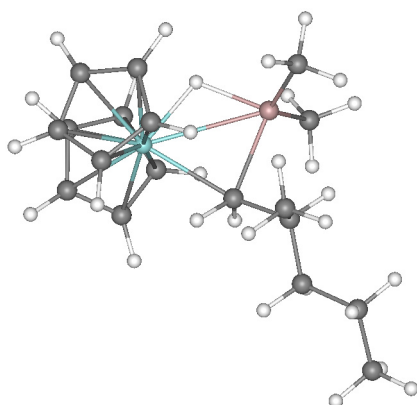

|                                             |                             |
|---------------------------------------------|-----------------------------|
| Zero-point vibrational energy               | 1135934.0 (Joules/Mol)      |
|                                             | 271.49475 (Kcal/Mol)        |
| Zero-point correction                       | 0.432654 (Hartree/Particle) |
| Thermal correction to Energy                | 0.457474                    |
| Thermal correction to Enthalpy              | 0.458418                    |
| Thermal correction to Gibbs Free Energy     | 0.378226                    |
| Sum of electronic and zero-point Energies   | -4486.277142                |
| Sum of electronic and thermal Energies      | -4486.252323                |
| Sum of electronic and thermal Enthalpies    | -4486.251378                |
| Sum of electronic and thermal Free Energies | -4486.331571                |

|    |             |             |             | cartesian |             |             |             |
|----|-------------|-------------|-------------|-----------|-------------|-------------|-------------|
| 6  | 3.79535007  | 1.53163600  | 0.42124194  | 6         | -0.57705003 | -1.00206399 | -3.04495811 |
| 6  | 2.67135000  | 2.24483609  | -0.07365809 | 1         | 0.19114992  | 2.59593606  | -3.24925804 |
| 6  | 1.67124987  | 2.23413610  | 0.92924196  | 1         | -1.31675005 | 2.61943603  | -2.36105824 |
| 6  | 2.18674994  | 1.53393602  | 2.05694175  | 1         | 0.18524992  | 3.06133604  | -1.55365813 |
| 6  | 3.50014997  | 1.10823596  | 1.74604189  | 1         | 0.26644990  | -1.48646402 | -3.55165815 |
| 40 | 1.97904992  | -0.15386397 | 0.21994191  | 1         | -1.11525011 | -1.78786397 | -2.50085807 |
| 6  | -0.41965014 | -0.26406395 | 0.11154191  | 1         | -1.24855018 | -0.65226400 | -3.83615804 |
| 1  | 1.77924991  | 0.30593604  | -1.62315810 | 1         | -0.07805008 | -0.11676396 | 1.17224193  |
| 6  | 1.86034989  | -2.49946380 | -0.69595808 | 1         | -0.53025013 | -1.34636402 | -0.02005809 |
| 6  | 3.10894990  | -1.96166396 | -1.11535811 | 6         | -1.86115003 | 0.32623604  | 0.11694191  |
| 6  | 3.89864993  | -1.73966396 | 0.03894191  | 6         | -2.80145001 | -0.65096396 | 0.84584194  |
| 6  | 3.13984990  | -2.13526392 | 1.17604184  | 6         | -1.90895009 | 1.73133600  | 0.71544194  |
| 6  | 1.88714981  | -2.61906385 | 0.71334195  | 1         | -2.23605013 | 0.38573605  | -0.92045808 |
| 1  | 0.70154989  | 2.70923615  | 0.86754191  | 1         | -2.92435002 | 2.13113618  | 0.68804193  |
| 1  | 1.67444992  | 1.37713599  | 2.99984193  | 1         | -1.58575010 | 1.71223605  | 1.76384187  |
| 1  | 2.59314990  | 2.71393609  | -1.04625809 | 1         | -1.27775002 | 2.43033624  | 0.16264191  |
| 1  | 4.73084974  | 1.37973607  | -0.10335809 | 6         | -4.26865005 | -0.21776398 | 0.88534194  |
| 1  | 4.16694975  | 0.56573600  | 2.40484190  | 1         | -2.73655009 | -1.62856400 | 0.35134190  |
| 1  | 4.91074991  | -1.35506403 | 0.05434191  | 1         | -2.43355012 | -0.79456401 | 1.87194192  |
| 1  | 3.40415001  | -1.77056396 | -2.13935804 | 6         | -5.16975021 | -1.32906401 | 1.42374182  |

|    |             |             |             |   |             |             |             |
|----|-------------|-------------|-------------|---|-------------|-------------|-------------|
| 1  | 1.04294991  | -2.77996397 | -1.35005808 | 1 | -4.59215021 | 0.06523603  | -0.12345809 |
| 1  | 1.08874989  | -3.00496387 | 1.33714187  | 1 | -4.38105011 | 0.67083603  | 1.51354182  |
| 1  | 3.47654986  | -2.12466383 | 2.20544195  | 1 | -6.21054983 | -1.00286400 | 1.47234190  |
| 13 | 0.00724989  | 0.46763602  | -1.90015817 | 1 | -4.86495018 | -1.62556398 | 2.43154192  |
| 6  | -0.25425011 | 2.36333609  | -2.27365804 | 1 | -5.12585020 | -2.21586394 | 0.78534192  |

### I-4H\_bi

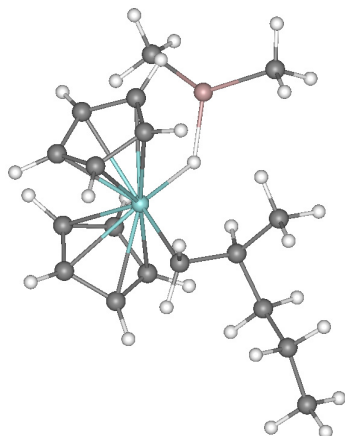

|                                             |                             |
|---------------------------------------------|-----------------------------|
| Zero-point vibrational energy               | 1132658.0 (Joules/Mol)      |
|                                             | 270.71177 (Kcal/Mol)        |
| Zero-point correction                       | 0.431407 (Hartree/Particle) |
| Thermal correction to Energy                | 0.456920                    |
| Thermal correction to Enthalpy              | 0.457864                    |
| Thermal correction to Gibbs Free Energy     | 0.374211                    |
| Sum of electronic and zero-point Energies   | -4486.262023                |
| Sum of electronic and thermal Energies      | -4486.236510                |
| Sum of electronic and thermal Enthalpies    | -4486.235565                |
| Sum of electronic and thermal Free Energies | -4486.319218                |

### cartesian

|   |             |             |             |   |             |             |             |
|---|-------------|-------------|-------------|---|-------------|-------------|-------------|
| 6 | 0.74059618  | -2.64763188 | 0.74807203  | 6 | -4.13320398 | 0.81736803  | 1.82127202  |
| 6 | -0.39710388 | -3.26193190 | 0.16937199  | 1 | -1.54820383 | 3.85746813  | 1.60007203  |
| 6 | -1.53660393 | -2.88573194 | 0.93757200  | 1 | -1.19450390 | 3.45346808  | -0.07312801 |
| 6 | -1.10700393 | -2.01593208 | 1.95987189  | 1 | -2.80740404 | 4.01726818  | 0.38817197  |
| 6 | 0.30379611  | -1.85083199 | 1.83387196  | 1 | -4.08170366 | -0.26583201 | 1.97057211  |
| 1 | 0.93189609  | -1.25483203 | 2.48547196  | 1 | -4.35890388 | 1.26656806  | 2.79477191  |
| 1 | 1.76199615  | -2.77703190 | 0.41977197  | 1 | -5.00230360 | 1.02306807  | 1.18537199  |
| 1 | -0.38940388 | -3.94103193 | -0.67452800 | 6 | 1.27469611  | -0.51973200 | -1.28932798 |
| 1 | -2.55440378 | -3.21563196 | 0.76947200  | 6 | 1.56589615  | 0.59946799  | -0.30442804 |
| 1 | -1.73480392 | -1.55963194 | 2.71507192  | 6 | 1.54889607  | 1.99656796  | -0.94052798 |
| 6 | -1.61170387 | 0.46216801  | -2.29222822 | 6 | 2.82599592  | 0.35586801  | 0.54927200  |
| 6 | -1.44690382 | -0.88843203 | -2.66732812 | 1 | 2.01279593  | -1.31973195 | -1.26752794 |

|    |             |             |             |   |            |             |             |
|----|-------------|-------------|-------------|---|------------|-------------|-------------|
| 6  | -2.37600374 | -1.66823196 | -1.92862797 | 1 | 1.17049611 | -0.15413201 | -2.31162810 |
| 6  | -3.12540388 | -0.80273199 | -1.09722805 | 1 | 1.73029602 | 2.77396798  | -0.19212802 |
| 6  | -2.65820408 | 0.52266800  | -1.32942796 | 1 | 2.32029629 | 2.07026792  | -1.71082795 |
| 1  | -3.18700409 | 1.44276798  | -1.07652795 | 1 | 0.58679610 | 2.20476794  | -1.41732800 |
| 1  | -1.07950389 | 1.30936801  | -2.70662808 | 6 | 4.13439608 | 0.53656793  | -0.22412801 |
| 1  | -0.74140388 | -1.26483202 | -3.39642811 | 1 | 2.82159615 | 1.03626800  | 1.41007197  |
| 1  | -2.50800371 | -2.74013209 | -2.00652814 | 1 | 2.79269600 | -0.66303205 | 0.95487201  |
| 1  | -3.94110394 | -1.08463204 | -0.44212800 | 6 | 5.34229612 | 0.12006798  | 0.61517203  |
| 40 | -0.70920384 | -0.82533205 | -0.22892801 | 1 | 4.24569607 | 1.58406806  | -0.52092803 |
| 1  | -1.21230388 | 0.53636801  | 1.15707195  | 1 | 4.10329628 | -0.05113202 | -1.14902794 |
| 1  | 0.74629617  | 0.67096794  | 0.49017203  | 1 | 6.27499628 | 0.28006801  | 0.07057199  |
| 13 | -2.50930405 | 1.56966805  | 1.07397199  | 1 | 5.28899622 | -0.93873203 | 0.88497198  |
| 6  | -1.96620393 | 3.39036798  | 0.70097202  | 1 | 5.39309645 | 0.69936800  | 1.54157197  |

### I-4H\_bo

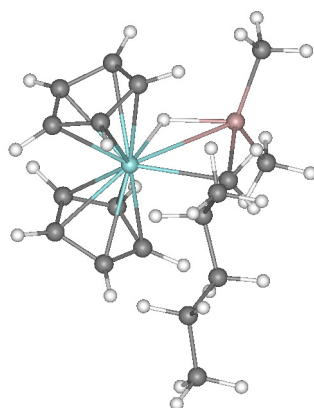

|                                             |                             |
|---------------------------------------------|-----------------------------|
| Zero-point vibrational energy               | 1139139.7 (Joules/Mol)      |
|                                             | 272.26093 (Kcal/Mol)        |
| Zero-point correction                       | 0.433875 (Hartree/Particle) |
| Thermal correction to Energy                | 0.458266                    |
| Thermal correction to Enthalpy              | 0.459210                    |
| Thermal correction to Gibbs Free Energy     | 0.381441                    |
| Sum of electronic and zero-point Energies   | -4486.286925                |
| Sum of electronic and thermal Energies      | -4486.262534                |
| Sum of electronic and thermal Enthalpies    | -4486.261590                |
| Sum of electronic and thermal Free Energies | -4486.339359                |

### cartesian

|   |            |             |            |   |            |            |             |
|---|------------|-------------|------------|---|------------|------------|-------------|
| 6 | 1.92533588 | -0.78495610 | 2.07330608 | 1 | 2.53123593 | 2.94004393 | -2.80459404 |
| 6 | 0.97023594 | -1.83825612 | 2.12290597 | 1 | 1.17353594 | 3.77494383 | -2.08329391 |
| 6 | 1.39263606 | -2.85825610 | 1.23830605 | 1 | 4.20723581 | 2.58024383 | 0.46180600  |
| 6 | 2.61973596 | -2.44485617 | 0.64750600 | 1 | 3.20363593 | 1.91594386 | 1.74660599  |
| 6 | 2.95713592 | -1.17555606 | 1.18000603 | 1 | 2.92183614 | 3.54744387 | 1.14750600  |

|    |             |             |             |   |             |             |             |
|----|-------------|-------------|-------------|---|-------------|-------------|-------------|
| 1  | 3.84803605  | -0.60475612 | 0.95150602  | 6 | -2.46706390 | 0.79034388  | 0.20740598  |
| 1  | 1.91113591  | 0.12424389  | 2.66100597  | 6 | -3.61456394 | -0.13305610 | 0.62010598  |
| 1  | 0.07963598  | -1.86415613 | 2.74020600  | 6 | -4.82616425 | 0.02754390  | -0.29829401 |
| 1  | 3.21733594  | -3.01955605 | -0.04879401 | 1 | -3.27536392 | -1.17865610 | 0.60660601  |
| 6  | -0.35676402 | -0.48655611 | -2.35649395 | 1 | -5.65096426 | -0.61325610 | 0.01840599  |
| 6  | -1.00306392 | -1.58495617 | -1.72439396 | 1 | -4.57616425 | -0.23135610 | -1.33189404 |
| 6  | -0.08806404 | -2.66345620 | -1.67149401 | 1 | -5.18366432 | 1.06084383  | -0.29239401 |
| 6  | 1.12523603  | -2.23845601 | -2.28109407 | 6 | 0.01843596  | 1.35424387  | 0.34610599  |
| 6  | 0.94993597  | -0.90215611 | -2.72119403 | 6 | -1.13476396 | 0.51914394  | 0.92810595  |
| 1  | 1.68233585  | -0.30425611 | -3.24839401 | 6 | -1.27256393 | 0.68734396  | 2.44660592  |
| 1  | -0.79636401 | 0.47864392  | -2.57619405 | 1 | 0.39013597  | 1.99734378  | 1.15630603  |
| 1  | -2.02426386 | -1.60285616 | -1.35999405 | 1 | -0.40446401 | 2.00254393  | -0.43179402 |
| 1  | 2.01193595  | -2.84245610 | -2.42679405 | 1 | -1.00086403 | -0.60725611 | 0.79530597  |
| 40 | 0.87153596  | -0.87595606 | -0.20179401 | 1 | -1.95856404 | -0.04895610 | 2.87180591  |
| 1  | 2.30023599  | 0.21184391  | -0.86399400 | 1 | -1.67046404 | 1.68464386  | 2.65790606  |
| 1  | -3.91156411 | 0.07824391  | 1.65180600  | 1 | -0.31166404 | 0.59764385  | 2.95730591  |
| 13 | 1.97093606  | 1.88674378  | -0.54809403 | 1 | -2.31616402 | 0.72164392  | -0.87629402 |
| 6  | 1.60593605  | 2.77984381  | -2.23949409 | 1 | -2.74236393 | 1.83294392  | 0.40880597  |
| 6  | 3.17913604  | 2.52764392  | 0.83870602  | 1 | -0.28996402 | -3.64865613 | -1.27059400 |
| 1  | 0.92063594  | 2.23354387  | -2.89689398 | 1 | 0.89073598  | -3.80295610 | 1.07230604  |

#### TS-4H

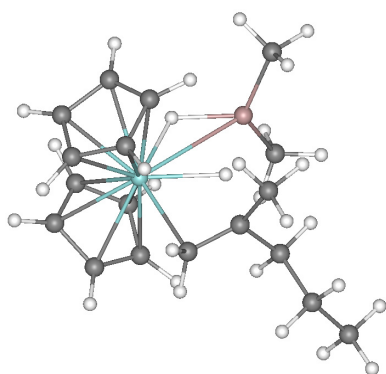

|                                             |                             |
|---------------------------------------------|-----------------------------|
| Zero-point vibrational energy               | 1126129.9 (Joules/Mol)      |
|                                             | 269.15151 (Kcal/Mol)        |
| Zero-point correction                       | 0.428920 (Hartree/Particle) |
| Thermal correction to Energy                | 0.453290                    |
| Thermal correction to Enthalpy              | 0.454234                    |
| Thermal correction to Gibbs Free Energy     | 0.376326                    |
| Sum of electronic and zero-point Energies   | -4486.258626                |
| Sum of electronic and thermal Energies      | -4486.234257                |
| Sum of electronic and thermal Enthalpies    | -4486.233313                |
| Sum of electronic and thermal Free Energies | -4486.311221                |

| cartesian |             |             |             |    |             |             |             |  |  |
|-----------|-------------|-------------|-------------|----|-------------|-------------|-------------|--|--|
| 6         | 2.16737223  | 1.84116399  | 1.12143600  | 1  | -0.35892797 | 1.73096406  | 2.26183581  |  |  |
| 6         | 3.17787218  | 1.54126406  | 0.16233599  | 1  | -1.76322806 | 2.10246396  | 1.23463607  |  |  |
| 6         | 3.83667183  | 0.36466402  | 0.57593602  | 1  | -1.95472801 | 1.12216401  | 2.69613600  |  |  |
| 6         | 3.24047184  | -0.07343599 | 1.79353607  | 1  | -0.31092793 | 0.63176399  | -0.08656400 |  |  |
| 6         | 2.23467207  | 0.86016405  | 2.14063597  | 1  | -2.64212799 | 0.39746398  | -0.37336400 |  |  |
| 1         | 1.63857210  | 0.83426404  | 3.04283595  | 1  | -2.00602818 | -1.24683595 | -0.37686399 |  |  |
| 1         | 1.51587200  | 2.70706391  | 1.10213602  | 1  | 0.15937206  | -0.77963597 | 2.64273596  |  |  |
| 1         | 3.40537214  | 2.12066388  | -0.72296399 | 1  | -0.50862789 | -1.98393595 | 1.44043601  |  |  |
| 1         | 4.66047239  | -0.11483599 | 0.06273600  | 13 | -0.14272797 | 1.63626397  | -1.69666398 |  |  |
| 1         | 3.54097223  | -0.93323600 | 2.37993598  | 1  | 1.36157203  | 0.84706402  | -1.55146396 |  |  |
| 6         | 2.69257212  | -1.69493604 | -1.70136404 | 6  | -1.29182792 | 0.74136400  | -2.98686409 |  |  |
| 6         | 2.78457212  | -2.43263602 | -0.48916399 | 6  | -0.04772794 | 3.51176381  | -1.18546402 |  |  |
| 6         | 1.48697209  | -2.86173606 | -0.13546400 | 1  | 0.98367202  | 3.88206387  | -1.17616403 |  |  |
| 6         | 0.58687204  | -2.40823603 | -1.14336395 | 1  | -0.61152792 | 4.14436436  | -1.87826395 |  |  |
| 6         | 1.33587205  | -1.71243596 | -2.11746407 | 1  | -0.46042794 | 3.69506383  | -0.18646401 |  |  |
| 1         | 0.94497204  | -1.26303601 | -3.02196407 | 1  | -2.28612804 | 1.19766402  | -3.03766418 |  |  |
| 1         | 3.51497221  | -1.23923600 | -2.23886418 | 1  | -0.86772799 | 0.81596404  | -3.99606419 |  |  |
| 1         | 3.69197226  | -2.63703609 | 0.06513600  | 1  | -1.43062794 | -0.32473600 | -2.77626419 |  |  |
| 1         | 1.23227203  | -3.46133614 | 0.72883600  | 6  | -3.44142771 | -0.86223596 | 1.18863606  |  |  |
| 1         | -0.47502792 | -2.61553621 | -1.18776405 | 6  | -4.60552788 | -1.42143595 | 0.37173602  |  |  |
| 40        | 1.49457204  | -0.33933598 | 0.02403600  | 1  | -3.78922796 | -0.01433600 | 1.78643596  |  |  |
| 6         | -2.28962803 | -0.41423601 | 0.27443600  | 1  | -3.07642794 | -1.61923599 | 1.89063597  |  |  |
| 6         | -1.08642793 | 0.03966400  | 1.09043598  | 1  | -5.42672777 | -1.72563601 | 1.02323604  |  |  |
| 6         | -0.23692793 | -0.95233595 | 1.64683604  | 1  | -4.29632759 | -2.29563618 | -0.20806399 |  |  |
| 6         | -1.28962791 | 1.33596396  | 1.85343599  | 1  | -4.99192762 | -0.67403597 | -0.32656398 |  |  |

## I-5H

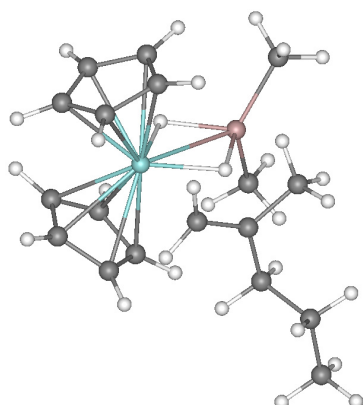

Zero-point vibrational energy

1127761.5 (Joules/Mol)

269.54147 (Kcal/Mol)

Zero-point correction

0.429542 (Hartree/Particle)

Thermal correction to Energy

0.454940

|                                             |              |
|---------------------------------------------|--------------|
| Thermal correction to Enthalpy              | 0.455885     |
| Thermal correction to Gibbs Free Energy     | 0.374290     |
| Sum of electronic and zero-point Energies   | -4486.269371 |
| Sum of electronic and thermal Energies      | -4486.243972 |
| Sum of electronic and thermal Enthalpies    | -4486.243028 |
| Sum of electronic and thermal Free Energies | -4486.324622 |

| cartesian |             |             |             |   |             |             |             |
|-----------|-------------|-------------|-------------|---|-------------|-------------|-------------|
| 6         | 0.27738017  | -2.27340412 | -1.45063996 | 6 | -0.42251986 | 2.48339605  | -2.56674004 |
| 6         | 1.64218020  | -2.61960411 | -1.33133996 | 1 | 0.24998015  | 4.57549572  | 0.32236004  |
| 6         | 2.39988017  | -1.64460397 | -2.04323983 | 1 | 0.90948015  | 3.39349604  | 1.45046008  |
| 6         | 1.49738014  | -0.70370400 | -2.59204006 | 1 | 1.94748020  | 4.14899588  | 0.23986004  |
| 6         | 0.18058017  | -1.07170391 | -2.19933987 | 1 | -0.32661986 | 3.49049616  | -2.98513985 |
| 1         | -0.73241985 | -0.55820400 | -2.47663999 | 1 | -0.08011985 | 1.78359604  | -3.33624005 |
| 1         | -0.55191982 | -2.84430408 | -1.05514002 | 1 | -1.49731982 | 2.30649614  | -2.43463993 |
| 1         | 2.03578019  | -3.49620390 | -0.83133996 | 6 | -0.54321980 | -1.46150398 | 1.61926007  |
| 1         | 3.47478008  | -1.64200401 | -2.17353988 | 6 | -1.42461979 | -0.47810400 | 1.29255998  |
| 1         | 1.76428020  | 0.14299601  | -3.21034002 | 6 | -1.56641996 | 0.74979603  | 2.15186000  |
| 6         | 2.28388023  | 0.05889602  | 2.23415995  | 6 | -2.43151999 | -0.63250399 | 0.18516006  |
| 6         | 2.63878012  | -1.29430401 | 1.94176006  | 1 | -0.60081983 | -2.44010401 | 1.14936006  |
| 6         | 3.59267998  | -1.27340400 | 0.89966005  | 1 | 0.00218016  | -1.39960396 | 2.55636001  |
| 6         | 3.79038000  | 0.07279602  | 0.50676006  | 1 | -1.83351982 | 1.62889600  | 1.55956006  |
| 6         | 2.99978018  | 0.89759600  | 1.35876000  | 1 | -2.37712002 | 0.57859600  | 2.86886001  |
| 1         | 2.95148039  | 1.97919595  | 1.32705998  | 1 | -0.66011989 | 0.96429598  | 2.72076011  |
| 1         | 1.60938013  | 0.38869601  | 3.01476002  | 6 | -3.86391973 | -0.76000398 | 0.74016005  |
| 1         | 2.29317999  | -2.17730379 | 2.46496010  | 1 | -2.38741970 | 0.24229601  | -0.47633997 |
| 1         | 4.07378006  | -2.14000416 | 0.46396005  | 1 | -2.20711994 | -1.51810396 | -0.41623998 |
| 1         | 4.46018028  | 0.42359602  | -0.26853997 | 6 | -4.87201977 | -0.99090397 | -0.38413996 |
| 40        | 1.41578019  | -0.46090397 | -0.08653995 | 1 | -4.12951994 | 0.14789602  | 1.28965998  |
| 1         | 1.86578012  | 1.19379604  | -1.00243998 | 1 | -3.89971972 | -1.58930397 | 1.45436001  |
| 1         | -0.02061987 | 0.90959597  | -0.01983995 | 1 | -5.88431978 | -1.07980394 | 0.01426005  |
| 13        | 0.52008015  | 2.32309580  | -0.86703998 | 1 | -4.64691973 | -1.90910399 | -0.93363994 |
| 6         | 0.94638014  | 3.73479605  | 0.40966004  | 1 | -4.86301994 | -0.16010398 | -1.09524000 |

## S1.4. Me<sub>2</sub>AlCl reaction profile

### I-OCI

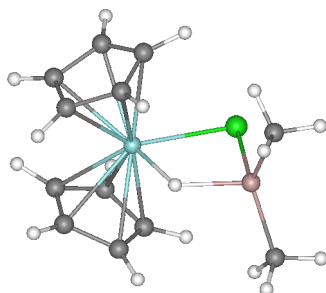

|                                             |                             |
|---------------------------------------------|-----------------------------|
| Zero-point vibrational energy               | 663989.4 (Joules/Mol)       |
|                                             | 158.69729 (Kcal/Mol)        |
| Zero-point correction                       | 0.252900 (Hartree/Particle) |
| Thermal correction to Energy                | 0.270165                    |
| Thermal correction to Enthalpy              | 0.271110                    |
| Thermal correction to Gibbs Free Energy     | 0.207188                    |
| Sum of electronic and zero-point Energies   | -4710.301965                |
| Sum of electronic and thermal Energies      | -4710.284700                |
| Sum of electronic and thermal Enthalpies    | -4710.283755                |
| Sum of electronic and thermal Free Energies | -4710.347677                |

| cartesian |             |             |             |    |             |             |             |  |  |
|-----------|-------------|-------------|-------------|----|-------------|-------------|-------------|--|--|
| 6         | 1.81931889  | 2.07045937  | -1.25137496 | 1  | 3.65041876  | -1.26364052 | -0.39337498 |  |  |
| 6         | 2.61931896  | 1.61115944  | -0.17537498 | 1  | 2.33161879  | -1.39874053 | 1.95592511  |  |  |
| 6         | 1.85041881  | 1.70965946  | 1.01562500  | 1  | -0.10728115 | -2.44374061 | 1.47752500  |  |  |
| 6         | 0.58321881  | 2.25915956  | 0.67512500  | 1  | -0.30758116 | -2.90054059 | -1.17137504 |  |  |
| 6         | 0.56011885  | 2.46955943  | -0.72627497 | 40 | 0.73171884  | -0.00224057 | -0.38787499 |  |  |
| 1         | -0.26728114 | 2.86725950  | -1.30117500 | 17 | -1.28428113 | -0.02334057 | -1.98977494 |  |  |
| 1         | 2.11941886  | 2.12165952  | -2.29237509 | 1  | -0.80218112 | -0.00834057 | 0.79312503  |  |  |
| 1         | 3.64481878  | 1.27195942  | -0.24567498 | 13 | -2.44878125 | -0.00714057 | 0.07582501  |  |  |
| 1         | 2.18751884  | 1.46015954  | 2.01432490  | 6  | -3.16248107 | -1.78194046 | 0.38492504  |  |  |
| 1         | -0.22078115 | 2.48135948  | 1.36562502  | 6  | -3.14838123 | 1.77915943  | 0.35252503  |  |  |
| 6         | 2.63251877  | -1.60334051 | -0.25187498 | 1  | -3.35298109 | -1.95224047 | 1.45012510  |  |  |
| 6         | 1.93651879  | -1.67584050 | 0.98622501  | 1  | -4.12128162 | -1.91184056 | -0.12797499 |  |  |
| 6         | 0.65461886  | -2.23784041 | 0.73602509  | 1  | -2.50388122 | -2.58344054 | 0.03572503  |  |  |
| 6         | 0.54961884  | -2.48424053 | -0.65667498 | 1  | -3.30028105 | 1.98655951  | 1.41742504  |  |  |
| 6         | 1.77301884  | -2.09704041 | -1.26507497 | 1  | -2.50088120 | 2.56515956  | -0.04907499 |  |  |
| 1         | 2.00891876  | -2.17274046 | -2.32107496 | 1  | -4.12478161 | 1.89495945  | -0.12967499 |  |  |

## I-1Cl

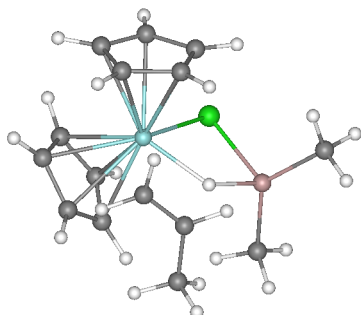

|                                             |                             |
|---------------------------------------------|-----------------------------|
| Zero-point vibrational energy               | 886300.5 (Joules/Mol)       |
|                                             | 211.83090 (Kcal/Mol)        |
| Zero-point correction                       | 0.337574 (Hartree/Particle) |
| Thermal correction to Energy                | 0.360321                    |
| Thermal correction to Enthalpy              | 0.361265                    |
| Thermal correction to Gibbs Free Energy     | 0.286333                    |
| Sum of electronic and zero-point Energies   | -4828.077044                |
| Sum of electronic and thermal Energies      | -4828.054296                |
| Sum of electronic and thermal Enthalpies    | -4828.053352                |
| Sum of electronic and thermal Free Energies | -4828.128284                |

cartesian

|    |             |             |             |    |             |             |             |
|----|-------------|-------------|-------------|----|-------------|-------------|-------------|
| 6  | 1.52011204  | 1.95962679  | 1.03774643  | 17 | -1.05428791 | -1.84017313 | 1.72124624  |
| 6  | 2.51931214  | 1.04612684  | 1.43884635  | 1  | -1.04538774 | 0.01212683  | -0.27745366 |
| 6  | 1.95701218  | 0.20122683  | 2.44234633  | 13 | -2.49988770 | -0.75367320 | 0.32654634  |
| 6  | 0.62111211  | 0.61262685  | 2.65604639  | 6  | -3.08978772 | -1.92587316 | -1.11035371 |
| 6  | 0.33071214  | 1.67402685  | 1.76224637  | 6  | -3.48288774 | 0.60022682  | 1.31964636  |
| 1  | -0.60638785 | 2.21302700  | 1.69674635  | 1  | -3.64418769 | -1.37327313 | -1.87695360 |
| 1  | 1.65171218  | 2.76282692  | 0.32644635  | 1  | -2.26448774 | -2.44017315 | -1.61465359 |
| 1  | 3.54111218  | 1.02512681  | 1.08104634  | 1  | -3.76758790 | -2.70067310 | -0.73585361 |
| 1  | 2.47231221  | -0.58597314 | 2.97894645  | 1  | -4.33438778 | 0.14432684  | 1.83764625  |
| 1  | -0.07178786 | 0.17102683  | 3.35934639  | 1  | -2.87848783 | 1.09422684  | 2.08794641  |
| 6  | 1.32961226  | -1.85487318 | -1.64675355 | 1  | -3.90038776 | 1.37732685  | 0.66984636  |
| 6  | 2.55641222  | -1.27277327 | -1.19535375 | 6  | 1.03871214  | 1.31382680  | -2.06195354 |
| 6  | 2.84091210  | -1.80537319 | 0.08394635  | 6  | -0.29548785 | 1.48292685  | -1.92375350 |
| 6  | 1.77311206  | -2.65357304 | 0.45644635  | 6  | -0.97128791 | 2.65372705  | -1.27965355 |
| 6  | 0.85351211  | -2.70347309 | -0.63385367 | 1  | 1.74791217  | 2.05722666  | -1.70945358 |
| 1  | -0.06358786 | -3.27837324 | -0.65725362 | 1  | 1.42141223  | 0.56222683  | -2.74205351 |
| 1  | 0.84841216  | -1.68577313 | -2.60285354 | 1  | -1.45858788 | 3.23732662  | -2.06815362 |
| 1  | 3.19911218  | -0.60637319 | -1.75735354 | 1  | -1.75638795 | 2.33652687  | -0.58735365 |
| 1  | 3.71551228  | -1.58367312 | 0.68224633  | 1  | -0.26928785 | 3.31142664  | -0.76455361 |
| 1  | 1.67991209  | -3.20027304 | 1.38684630  | 1  | -0.95038790 | 0.77152681  | -2.42635369 |
| 40 | 0.78701216  | -0.35627317 | 0.31984636  |    |             |             |             |

## TS-1Cl

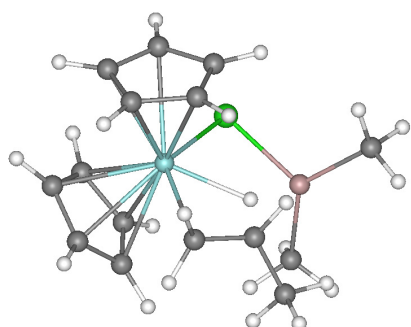

|                                             |                             |
|---------------------------------------------|-----------------------------|
| Zero-point vibrational energy               | 882100.4 (Joules/Mol)       |
|                                             | 210.82706 (Kcal/Mol)        |
| Zero-point correction                       | 0.335974 (Hartree/Particle) |
| Thermal correction to Energy                | 0.357878                    |
| Thermal correction to Enthalpy              | 0.358822                    |
| Thermal correction to Gibbs Free Energy     | 0.285805                    |
| Sum of electronic and zero-point Energies   | -4828.071225                |
| Sum of electronic and thermal Energies      | -4828.049321                |
| Sum of electronic and thermal Enthalpies    | -4828.048377                |
| Sum of electronic and thermal Free Energies | -4828.121395                |

cartesian

|    |             |             |             |    |             |             |             |
|----|-------------|-------------|-------------|----|-------------|-------------|-------------|
| 6  | 0.73094153  | 2.45389509  | 0.27595359  | 17 | -0.72865850 | -0.76130480 | 2.40195370  |
| 6  | 2.07494140  | 2.16149521  | -0.10484639 | 1  | -0.93825847 | -0.20400481 | -0.33934641 |
| 6  | 2.72334146  | 1.58519518  | 1.00895357  | 13 | -2.36355853 | -0.42780480 | 0.92095363  |
| 6  | 1.77984142  | 1.47719514  | 2.06645346  | 6  | -3.10505867 | -2.07290483 | 0.20625360  |
| 6  | 0.56024146  | 2.05169511  | 1.61545360  | 6  | -3.12155867 | 1.35149515  | 1.12085366  |
| 1  | -0.35055852 | 2.13279510  | 2.19585371  | 1  | -2.35075855 | -2.85010481 | 0.04835361  |
| 1  | -0.01745850 | 2.93179512  | -0.34514642 | 1  | -3.84585857 | -2.49020481 | 0.89775360  |
| 1  | 2.53484154  | 2.38199520  | -1.05954635 | 1  | -3.62505865 | -1.91480482 | -0.74494636 |
| 1  | 3.76334143  | 1.28979516  | 1.04625368  | 1  | -3.36505866 | 1.54659522  | 2.17155361  |
| 1  | 1.96494150  | 1.07569516  | 3.05545378  | 1  | -2.44265866 | 2.15059519  | 0.80225360  |
| 6  | 1.58744144  | -2.22710490 | -0.90364635 | 1  | -4.04915857 | 1.46999514  | 0.55125362  |
| 6  | 2.79384136  | -1.51150477 | -0.67234635 | 6  | 0.58274150  | 0.41609520  | -2.12044621 |
| 6  | 3.01904154  | -1.49240482 | 0.72985363  | 6  | -0.72935849 | -0.03110481 | -1.91874635 |
| 6  | 1.93324161  | -2.13600469 | 1.36065364  | 6  | -1.91295862 | 0.88219517  | -2.13104630 |
| 6  | 1.04564142  | -2.59620476 | 0.34495360  | 1  | 0.71664149  | 1.47299516  | -2.32914639 |
| 1  | 0.12654150  | -3.14460492 | 0.51145363  | 1  | 1.29444146  | -0.24960482 | -2.59554625 |
| 1  | 1.15514147  | -2.44860482 | -1.87204635 | 1  | -2.04785848 | 0.98729515  | -3.21234655 |
| 1  | 3.45714140  | -1.10810483 | -1.42814636 | 1  | -2.83965850 | 0.47739518  | -1.71874630 |
| 1  | 3.87794137  | -1.06660485 | 1.23105359  | 1  | -1.73935866 | 1.87619519  | -1.71474636 |
| 1  | 1.80424142  | -2.27530479 | 2.42645359  | 1  | -0.93165857 | -1.09170485 | -2.07224655 |
| 40 | 0.97804147  | -0.07240481 | 0.29305360  |    |             |             |             |

# I-2Cl\_a

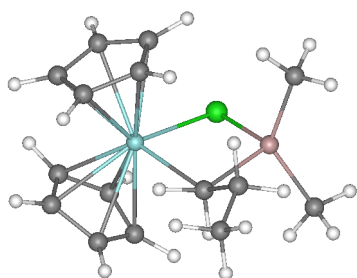

|                                             |                             |
|---------------------------------------------|-----------------------------|
| Zero-point vibrational energy               | 893577.6 (Joules/Mol)       |
|                                             | 213.57016 (Kcal/Mol)        |
| Zero-point correction                       | 0.340346 (Hartree/Particle) |
| Thermal correction to Energy                | 0.361888                    |
| Thermal correction to Enthalpy              | 0.362832                    |
| Thermal correction to Gibbs Free Energy     | 0.290111                    |
| Sum of electronic and zero-point Energies   | -4828.098749                |
| Sum of electronic and thermal Energies      | -4828.077207                |
| Sum of electronic and thermal Enthalpies    | -4828.076263                |
| Sum of electronic and thermal Free Energies | -4828.148984                |

| cartesian |             |             |             |    |             |             |             |  |  |  |  |
|-----------|-------------|-------------|-------------|----|-------------|-------------|-------------|--|--|--|--|
| 6         | -2.28972912 | 1.75091469  | 1.66371226  | 1  | -1.32642913 | -1.78958523 | -2.33068776 |  |  |  |  |
| 6         | -0.91312921 | 2.10431480  | 1.58761215  | 1  | -3.54362917 | -0.38498530 | -1.75498772 |  |  |  |  |
| 6         | -0.60262918 | 2.36191463  | 0.23611219  | 13 | 1.84377098  | -0.46448532 | 1.17191219  |  |  |  |  |
| 6         | -1.78762913 | 2.17091465  | -0.53528780 | 6  | 2.55637097  | 1.21871471  | 1.84741211  |  |  |  |  |
| 6         | -2.83262920 | 1.82361472  | 0.35631219  | 6  | 2.72697091  | -2.18988514 | 1.01851225  |  |  |  |  |
| 40        | -1.21112919 | -0.07758530 | 0.36131218  | 1  | 2.54077077  | 1.22591472  | 2.94361234  |  |  |  |  |
| 6         | 0.92787081  | -0.26558530 | -0.80238777 | 1  | 3.60577106  | 1.34241474  | 1.55591226  |  |  |  |  |
| 17        | -0.06372917 | -0.88248533 | 2.51171231  | 1  | 2.03507090  | 2.12391472  | 1.51751208  |  |  |  |  |
| 6         | -1.47002912 | -2.51238537 | -0.22158778 | 1  | 3.24137092  | -2.44648528 | 1.95081210  |  |  |  |  |
| 6         | -2.42632914 | -2.24078536 | 0.79221219  | 1  | 2.02317095  | -3.00428534 | 0.81411219  |  |  |  |  |
| 6         | -3.36802912 | -1.32008529 | 0.27611220  | 1  | 3.48587084  | -2.21058536 | 0.22831219  |  |  |  |  |
| 6         | -3.00462914 | -1.02998531 | -1.07198787 | 1  | 0.08757085  | 0.17641470  | -1.40438771 |  |  |  |  |
| 6         | -1.84462929 | -1.78398526 | -1.37888789 | 1  | 1.00807071  | -1.28998530 | -1.18778777 |  |  |  |  |
| 1         | 0.36317080  | 2.66301465  | -0.15008783 | 6  | 2.14607096  | 0.52951467  | -1.34428787 |  |  |  |  |
| 1         | -1.88542914 | 2.31911469  | -1.60468769 | 6  | 2.22877097  | 0.47621471  | -2.87108779 |  |  |  |  |
| 1         | -0.22312918 | 2.14261484  | 2.42181230  | 1  | 3.07937098  | 0.11761469  | -0.93818778 |  |  |  |  |
| 1         | -2.83232903 | 1.50221479  | 2.56871223  | 1  | 3.10207081  | 1.02381480  | -3.23178768 |  |  |  |  |
| 1         | -3.86472917 | 1.64021480  | 0.08561221  | 1  | 2.30737090  | -0.55618531 | -3.22148776 |  |  |  |  |
| 1         | -4.22822905 | -0.92748529 | 0.80431223  | 1  | 1.33937073  | 0.92341465  | -3.32598782 |  |  |  |  |
| 1         | -2.41742921 | -2.64948535 | 1.79501224  | 1  | 2.10687089  | 1.56811476  | -1.00328779 |  |  |  |  |
| 1         | -0.62012917 | -3.17858529 | -0.12978780 |    |             |             |             |  |  |  |  |

# I-2Cl\_bi

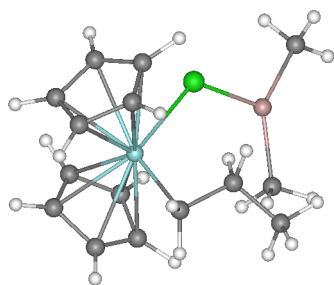

|                                             |                             |
|---------------------------------------------|-----------------------------|
| Zero-point vibrational energy               | 892664.4 (Joules/Mol)       |
|                                             | 213.35190 (Kcal/Mol)        |
| Zero-point correction                       | 0.339998 (Hartree/Particle) |
| Thermal correction to Energy                | 0.362896                    |
| Thermal correction to Enthalpy              | 0.363840                    |
| Thermal correction to Gibbs Free Energy     | 0.286421                    |
| Sum of electronic and zero-point Energies   | -4828.085847                |
| Sum of electronic and thermal Energies      | -4828.062949                |
| Sum of electronic and thermal Enthalpies    | -4828.062005                |
| Sum of electronic and thermal Free Energies | -4828.139424                |

| cartesian |             |             |             |    |             |             |             |  |  |  |  |
|-----------|-------------|-------------|-------------|----|-------------|-------------|-------------|--|--|--|--|
| 6         | -2.22079992 | -1.09200001 | 1.86969995  | 17 | 1.58840001  | -1.34500003 | -0.05870000 |  |  |  |  |
| 6         | -3.11680007 | -0.95260000 | 0.77929997  | 1  | 0.67930001  | 0.79259998  | 1.36880004  |  |  |  |  |
| 6         | -2.66709995 | -1.80739999 | -0.26280001 | 13 | 3.55819988  | -0.33820000 | -0.14420000 |  |  |  |  |
| 6         | -1.47469997 | -2.43409991 | 0.16329999  | 6  | 3.35859990  | 1.56710005  | -0.41909999 |  |  |  |  |
| 6         | -1.19970000 | -1.99030006 | 1.48959994  | 6  | 4.99060011  | -1.60630000 | 0.05920000  |  |  |  |  |
| 1         | -0.36269999 | -2.30340004 | 2.10220003  | 1  | 4.26639986  | 2.11520004  | -0.14990000 |  |  |  |  |
| 1         | -2.30119991 | -0.58759999 | 2.82360005  | 1  | 2.53130007  | 1.98029995  | 0.16830000  |  |  |  |  |
| 1         | -4.00229979 | -0.32920000 | 0.75950003  | 1  | 3.15260005  | 1.79209995  | -1.47259998 |  |  |  |  |
| 1         | -3.15149999 | -1.95510006 | -1.21940005 | 1  | 4.90070009  | -2.41149998 | -0.67699999 |  |  |  |  |
| 1         | -0.88429999 | -3.13949990 | -0.40880001 | 1  | 4.94840002  | -2.07920003 | 1.04610002  |  |  |  |  |
| 6         | -0.28150001 | 1.90369999  | -1.58369994 | 1  | 5.97629976  | -1.14859998 | -0.05400000 |  |  |  |  |
| 6         | -1.70229995 | 1.87020004  | -1.54620004 | 6  | -1.33589995 | 1.70340002  | 1.40380001  |  |  |  |  |
| 6         | -2.12430000 | 0.65009999  | -2.12030005 | 6  | 0.02070000  | 1.42449999  | 2.03760004  |  |  |  |  |
| 6         | -0.96509999 | -0.07700000 | -2.52449989 | 6  | 0.85619998  | 2.67750001  | 2.32599998  |  |  |  |  |
| 6         | 0.16310000  | 0.71730000  | -2.21650004 | 1  | -0.07500000 | 0.81150001  | 2.93849993  |  |  |  |  |
| 1         | 1.19190001  | 0.44990000  | -2.41989994 | 1  | -2.15869999 | 1.61740005  | 2.11100006  |  |  |  |  |
| 1         | 0.34599999  | 2.71499991  | -1.23230004 | 1  | -1.35529995 | 2.69740009  | 0.95630002  |  |  |  |  |
| 1         | -2.35069990 | 2.64269996  | -1.15649998 | 1  | 1.84909999  | 2.42820001  | 2.70989990  |  |  |  |  |
| 1         | -3.15229988 | 0.34040001  | -2.25799990 | 1  | 0.34540001  | 3.29119992  | 3.07089996  |  |  |  |  |
| 1         | -0.95160002 | -1.04190004 | -3.01629996 | 1  | 0.97229999  | 3.28230000  | 1.42200005  |  |  |  |  |
| 40        | -0.93699998 | -0.00050000 | -0.03180000 |    |             |             |             |  |  |  |  |

## I-2Cl\_bo

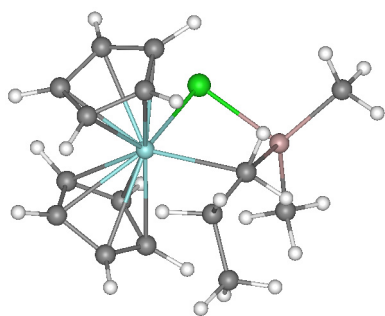

|                                             |                             |
|---------------------------------------------|-----------------------------|
| Zero-point vibrational energy               | 897505.9 (Joules/Mol)       |
|                                             | 214.50906 (Kcal/Mol)        |
| Zero-point correction                       | 0.341842 (Hartree/Particle) |
| Thermal correction to Energy                | 0.363494                    |
| Thermal correction to Enthalpy              | 0.364438                    |
| Thermal correction to Gibbs Free Energy     | 0.293390                    |
| Sum of electronic and zero-point Energies   | -4828.096474                |
| Sum of electronic and thermal Energies      | -4828.074822                |
| Sum of electronic and thermal Enthalpies    | -4828.073878                |
| Sum of electronic and thermal Free Energies | -4828.144926                |

| cartesian |             |             |             |   |             |             |             |  |  |
|-----------|-------------|-------------|-------------|---|-------------|-------------|-------------|--|--|
| 6         | 1.74558544  | -1.90562677 | -1.35178053 | 6 | -3.06921458 | 1.04487324  | 1.31771946  |  |  |
| 6         | 2.84668541  | -1.15162683 | -0.84918046 | 6 | -3.40121460 | -2.04962683 | -0.28008050 |  |  |
| 6         | 3.03618550  | -1.52202678 | 0.50891954  | 1 | -3.14421463 | 1.86887324  | 0.59751952  |  |  |
| 6         | 2.02738523  | -2.44582677 | 0.85731953  | 1 | -2.48741460 | 1.40507317  | 2.17241955  |  |  |
| 6         | 1.23208547  | -2.68862677 | -0.30148047 | 1 | -4.08621454 | 0.87787318  | 1.69101954  |  |  |
| 1         | 0.37538540  | -3.34992671 | -0.35048050 | 1 | -4.13761473 | -2.45152664 | 0.42431951  |  |  |
| 1         | 1.36478543  | -1.87192678 | -2.36528063 | 1 | -2.76891470 | -2.89012671 | -0.58608049 |  |  |
| 1         | 3.47138548  | -0.47602680 | -1.42158043 | 1 | -3.96181440 | -1.72312677 | -1.16348052 |  |  |
| 1         | 1.88728535  | -2.90572667 | 1.82791948  | 6 | -0.49411458 | 2.10327339  | -2.25248051 |  |  |
| 6         | 0.20588541  | 2.02077341  | 1.19911957  | 6 | -0.99941456 | -0.19112681 | -1.19978046 |  |  |
| 6         | 1.43208539  | 2.18257332  | 0.49171954  | 6 | -0.00321458 | 0.67877316  | -1.99518049 |  |  |
| 6         | 2.44088531  | 1.48217320  | 1.18961954  | 1 | 0.23938541  | 0.18797319  | -2.94118071 |  |  |
| 6         | 1.84608543  | 0.88967323  | 2.34131956  | 1 | -1.09171462 | -1.17292678 | -1.67398059 |  |  |
| 6         | 0.47778541  | 1.25197315  | 2.35611963  | 1 | -1.96441460 | 0.31007320  | -1.37218046 |  |  |
| 1         | -0.24201459 | 0.96027315  | 3.10971975  | 1 | 1.02288532  | 0.78127313  | -1.54158044 |  |  |
| 1         | -0.75041461 | 2.45917320  | 0.94401950  | 1 | -0.80111456 | 2.59817338  | -1.32788050 |  |  |
| 1         | 1.57398546  | 2.76047325  | -0.41408050 | 1 | -1.36101460 | 2.07457328  | -2.91668034 |  |  |
| 1         | 2.35688543  | 0.30507320  | 3.09711933  | 1 | 3.48558545  | 1.43157315  | 0.90921950  |  |  |
| 40        | 0.85878539  | -0.27692682 | 0.36881953  | 1 | 3.81178546  | -1.15302682 | 1.16771960  |  |  |
| 17        | -0.85721457 | -1.55542684 | 1.93821955  | 1 | 0.27568540  | 2.71067333  | -2.73378038 |  |  |
| 13        | -2.39321470 | -0.60402679 | 0.52831954  |   |             |             |             |  |  |

# I-4Cl\_a

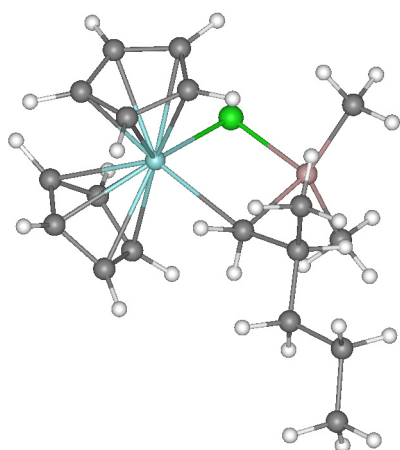

|                                             |                             |
|---------------------------------------------|-----------------------------|
| Zero-point vibrational energy               | 1121463.1 (Joules/Mol)      |
|                                             | 268.03612 (Kcal/Mol)        |
| Zero-point correction                       | 0.427143 (Hartree/Particle) |
| Thermal correction to Energy                | 0.453303                    |
| Thermal correction to Enthalpy              | 0.454248                    |
| Thermal correction to Gibbs Free Energy     | 0.371644                    |
| Sum of electronic and zero-point Energies   | -4945.898348                |
| Sum of electronic and thermal Energies      | -4945.872188                |
| Sum of electronic and thermal Enthalpies    | -4945.871243                |
| Sum of electronic and thermal Free Energies | -4945.953847                |

| cartesian |             |             |             |   |             |             |             |  |  |  |  |
|-----------|-------------|-------------|-------------|---|-------------|-------------|-------------|--|--|--|--|
| 6         | -3.85750389 | 0.51789600  | -1.51404810 | 6 | 0.90799600  | 2.01249599  | 2.65585208  |  |  |  |  |
| 6         | -2.77520394 | 1.40999603  | -1.75204802 | 1 | -0.09090394 | 4.32889605  | -0.11764802 |  |  |  |  |
| 6         | -1.69720387 | 0.66319597  | -2.26854801 | 1 | 1.29529619  | 3.52269602  | -0.82704800 |  |  |  |  |
| 6         | -2.11020398 | -0.70000398 | -2.36664796 | 1 | -0.32900396 | 3.17499614  | -1.41724801 |  |  |  |  |
| 6         | -3.45330381 | -0.77830398 | -1.92854786 | 1 | 0.78809601  | 2.98659611  | 3.14245200  |  |  |  |  |
| 40        | -2.08080387 | -0.18720397 | 0.07555199  | 1 | 0.45999604  | 1.27139604  | 3.32735205  |  |  |  |  |
| 6         | 0.36529607  | -0.03070398 | 0.27485198  | 1 | 1.98449612  | 1.80979598  | 2.62435198  |  |  |  |  |
| 17        | -2.24750400 | 2.03099608  | 1.35465193  | 1 | 0.00319606  | -0.83250403 | -0.42584801 |  |  |  |  |
| 6         | -1.94300389 | -1.25110400 | 2.35325193  | 1 | 0.51289600  | -0.54180402 | 1.23315191  |  |  |  |  |
| 6         | -3.30500388 | -0.89850402 | 2.15845203  | 6 | 1.79939604  | 0.23929602  | -0.29474801 |  |  |  |  |
| 6         | -3.81170392 | -1.66960406 | 1.08775198  | 6 | 2.71369600  | -0.93880403 | 0.08285198  |  |  |  |  |
| 6         | -2.76250386 | -2.51480389 | 0.62045199  | 6 | 1.78699613  | 0.50829601  | -1.79784799 |  |  |  |  |
| 6         | -1.61920404 | -2.26680398 | 1.42045188  | 1 | 2.23349619  | 1.12679601  | 0.19335198  |  |  |  |  |
| 1         | -0.73390394 | 1.05479598  | -2.56234789 | 1 | 2.79939604  | 0.67829597  | -2.16964793 |  |  |  |  |
| 1         | -1.51760387 | -1.52050400 | -2.75594807 | 1 | 1.37279606  | -0.34950399 | -2.34324789 |  |  |  |  |
| 1         | -2.77510405 | 2.47219610  | -1.54144812 | 1 | 1.20849609  | 1.40129602  | -2.04234791 |  |  |  |  |
| 1         | -4.83260393 | 0.79069597  | -1.12704802 | 6 | 4.17359591  | -0.78160399 | -0.34864801 |  |  |  |  |

|    |             |             |             |   |            |             |             |
|----|-------------|-------------|-------------|---|------------|-------------|-------------|
| 1  | -4.06500387 | -1.67130399 | -1.91064787 | 1 | 2.68369603 | -1.06190395 | 1.17325187  |
| 1  | -4.82420397 | -1.63800406 | 0.70495200  | 1 | 2.30049610 | -1.86280406 | -0.34774801 |
| 1  | -3.84970379 | -0.14910397 | 2.71925211  | 6 | 5.06279612 | -1.86440396 | 0.26265198  |
| 1  | -1.27980399 | -0.82420403 | 3.09635210  | 1 | 4.53609610 | 0.20819601  | -0.04644802 |
| 1  | -0.65780395 | -2.75650382 | 1.31805205  | 1 | 4.25189590 | -0.82690400 | -1.43884802 |
| 1  | -2.83740401 | -3.25110388 | -0.17004803 | 1 | 6.09769630 | -1.75690401 | -0.06814802 |
| 13 | 0.08729607  | 2.02329612  | 0.88985199  | 1 | 4.72119617 | -2.86170387 | -0.02944802 |
| 6  | 0.25749606  | 3.36639619  | -0.51174802 | 1 | 5.05239630 | -1.81190395 | 1.35485196  |

### I-4Cl\_bi

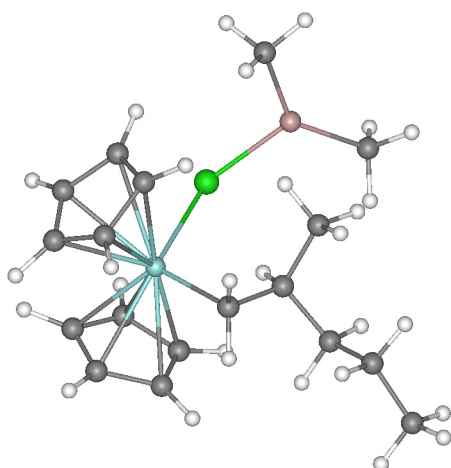

|                                             |                             |
|---------------------------------------------|-----------------------------|
| Zero-point vibrational energy               | 1119945.6 (Joules/Mol)      |
|                                             | 267.67343 (Kcal/Mol)        |
| Zero-point correction                       | 0.426565 (Hartree/Particle) |
| Thermal correction to Energy                | 0.453157                    |
| Thermal correction to Enthalpy              | 0.454101                    |
| Thermal correction to Gibbs Free Energy     | 0.369415                    |
| Sum of electronic and zero-point Energies   | -4945.889515                |
| Sum of electronic and thermal Energies      | -4945.862922                |
| Sum of electronic and thermal Enthalpies    | -4945.861978                |
| Sum of electronic and thermal Free Energies | -4945.946664                |

cartesian

|   |            |             |             |   |             |             |             |
|---|------------|-------------|-------------|---|-------------|-------------|-------------|
| 6 | 1.25066984 | -2.47885180 | -1.32474601 | 6 | -2.48753023 | 3.07384801  | -1.69074607 |
| 6 | 2.62376976 | -2.39255190 | -0.98774600 | 1 | -0.91933024 | 4.97424793  | 1.14855397  |
| 6 | 3.20726991 | -1.36635208 | -1.78484607 | 1 | 0.18696982  | 3.67574811  | 1.59285402  |
| 6 | 2.19056988 | -0.79925203 | -2.57924581 | 1 | 0.69576979  | 4.90564775  | 0.44005403  |
| 6 | 0.97276986 | -1.47845209 | -2.28784585 | 1 | -2.47463012 | 3.72124815  | -2.57494593 |
| 1 | 0.01356983 | -1.28725207 | -2.75514579 | 1 | -2.64323020 | 2.05224800  | -2.05194592 |
| 1 | 0.54846984 | -3.19655180 | -0.92474604 | 1 | -3.35433006 | 3.36514807  | -1.09054601 |
| 1 | 3.14476991 | -3.03065181 | -0.28454599 | 6 | 0.04706985  | -1.23505199 | 1.10515404  |

|    |             |             |             |   |             |             |             |
|----|-------------|-------------|-------------|---|-------------|-------------|-------------|
| 1  | 4.24916983  | -1.07185209 | -1.78184605 | 6 | -1.03293014 | -0.49245203 | 0.31695399  |
| 1  | 2.31216979  | 0.01234798  | -3.28614593 | 6 | -1.63173008 | 0.69124794  | 1.08975399  |
| 6  | 2.05426979  | 0.99994797  | 2.00615406  | 6 | -2.11823010 | -1.41845202 | -0.26614600 |
| 6  | 2.75146985  | -0.23855202 | 2.08165407  | 1 | -0.07433015 | -2.31695199 | 1.06375396  |
| 6  | 3.77436972  | -0.21825202 | 1.10655403  | 1 | 0.07356983  | -0.92735207 | 2.15155411  |
| 6  | 3.69876981  | 1.01994801  | 0.40715399  | 1 | -2.40673018 | 1.20224798  | 0.50265396  |
| 6  | 2.65566993  | 1.77964795  | 0.99515402  | 1 | -2.10303020 | 0.35154799  | 2.01625419  |
| 1  | 2.36596966  | 2.78024817  | 0.69955397  | 1 | -0.85853016 | 1.41354799  | 1.38875401  |
| 1  | 1.23036981  | 1.29814792  | 2.64345407  | 6 | -3.04083014 | -2.03555202 | 0.78695405  |
| 1  | 2.54626989  | -1.04375207 | 2.77505422  | 1 | -2.72383022 | -0.85795200 | -0.99064600 |
| 1  | 4.49796963  | -1.00405204 | 0.93105400  | 1 | -1.62613010 | -2.22185183 | -0.82904601 |
| 1  | 4.35446978  | 1.34934795  | -0.38924599 | 6 | -3.98953009 | -3.06285191 | 0.16885400  |
| 40 | 1.63516986  | -0.24965201 | -0.18164599 | 1 | -3.63003016 | -1.24895203 | 1.26975393  |
| 17 | 0.76306981  | 1.99504793  | -1.64904606 | 1 | -2.44153023 | -2.50775194 | 1.57355392  |
| 1  | -0.59763014 | -0.03565201 | -0.61784601 | 1 | -4.66583014 | -3.47685194 | 0.91935396  |
| 13 | -0.83333015 | 3.23924804  | -0.71484601 | 1 | -3.43443012 | -3.89305186 | -0.27694601 |
| 6  | -0.15673018 | 4.29484797  | 0.75675404  | 1 | -4.60002995 | -2.60875201 | -0.61684597 |

#### I-4Cl\_bo

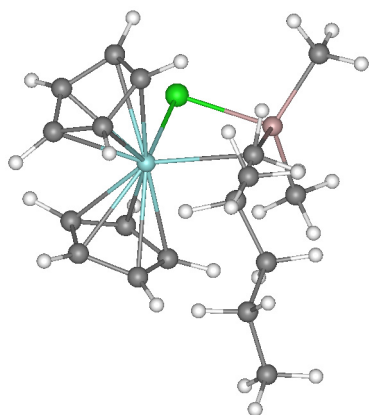

|                                             |                             |
|---------------------------------------------|-----------------------------|
| Zero-point vibrational energy               | 1124103.1 (Joules/Mol)      |
|                                             | 268.66709 (Kcal/Mol)        |
| Zero-point correction                       | 0.428148 (Hartree/Particle) |
| Thermal correction to Energy                | 0.453960                    |
| Thermal correction to Enthalpy              | 0.454904                    |
| Thermal correction to Gibbs Free Energy     | 0.374265                    |
| Sum of electronic and zero-point Energies   | -4945.898112                |
| Sum of electronic and thermal Energies      | -4945.872300                |
| Sum of electronic and thermal Enthalpies    | -4945.871356                |
| Sum of electronic and thermal Free Energies | -4945.951995                |

cartesian

|    |             |             |             |   |             |             |             |
|----|-------------|-------------|-------------|---|-------------|-------------|-------------|
| 6  | 1.88147402  | -1.40067208 | 2.08391380  | 1 | 0.93317401  | 2.69902802  | -2.69308615 |
| 6  | 1.13177407  | -2.49937201 | 1.56531405  | 1 | 0.89007401  | 4.24642801  | -1.87358594 |
| 6  | 1.88127398  | -3.07407212 | 0.51121402  | 1 | 2.95017409  | 4.17752838  | 1.03381395  |
| 6  | 3.06767416  | -2.31247211 | 0.34661400  | 1 | 2.69927406  | 2.78552794  | 2.07831383  |
| 6  | 3.07547402  | -1.30127203 | 1.34481406  | 1 | 1.42597413  | 3.99492812  | 1.88791406  |
| 1  | 3.85147405  | -0.56127203 | 1.48901403  | 6 | -2.26642585 | 0.56752801  | 0.28871399  |
| 1  | 1.61407399  | -0.77787203 | 2.92681384  | 6 | -3.45242572 | -0.40177202 | 0.27301401  |
| 1  | 0.18237406  | -2.86147213 | 1.94371402  | 6 | -4.48212624 | -0.01817201 | -0.78948599 |
| 1  | 3.85487413  | -2.49787211 | -0.37418601 | 1 | -3.10382581 | -1.42947209 | 0.09991400  |
| 6  | -0.06992596 | -0.11327201 | -2.37778616 | 1 | -5.34562635 | -0.68527198 | -0.76498598 |
| 6  | -0.71052593 | -1.28997207 | -1.90208602 | 1 | -4.04972601 | -0.06367201 | -1.79438603 |
| 6  | 0.20647407  | -2.36067200 | -1.98598599 | 1 | -4.84262609 | 1.00182796  | -0.63048601 |
| 6  | 1.42017412  | -1.85397208 | -2.53708601 | 6 | 0.14627406  | 1.05822790  | 0.94181395  |
| 6  | 1.23227406  | -0.47817200 | -2.80208611 | 6 | -1.03602600 | 0.07152799  | 1.06551397  |
| 1  | 1.96957397  | 0.19022797  | -3.22628617 | 6 | -1.38872600 | -0.22967201 | 2.52811384  |
| 1  | -0.51422590 | 0.86922795  | -2.47368622 | 1 | 0.63817406  | 1.16302788  | 1.91371405  |
| 1  | -1.73262596 | -1.36397207 | -1.55178595 | 1 | -0.35752594 | 2.02322793  | 0.76781398  |
| 1  | 2.31087399  | -2.42897201 | -2.75878620 | 1 | -0.82082599 | -0.95357198 | 0.62931401  |
| 40 | 1.17717409  | -0.79677200 | -0.28058600 | 1 | -2.15072584 | -1.00907207 | 2.60301399  |
| 17 | 3.10797405  | 0.95862800  | -0.79718602 | 1 | -1.78112578 | 0.67912799  | 2.99471378  |
| 1  | -3.93242574 | -0.41227204 | 1.25611401  | 1 | -0.51922590 | -0.54887199 | 3.10511398  |
| 13 | 1.49947405  | 2.46732783  | -0.17078601 | 1 | -1.97552586 | 0.82152802  | -0.73708600 |
| 6  | 0.62877405  | 3.18792796  | -1.76128602 | 1 | -2.58562589 | 1.51142788  | 0.74871403  |
| 6  | 2.20487404  | 3.44042802  | 1.35211396  | 1 | -0.00322592 | -3.39037204 | -1.72788596 |
| 1  | -0.46622592 | 3.14992785  | -1.70858598 | 1 | 1.60607409  | -3.95027208 | -0.05998601 |

## TS-4Cl

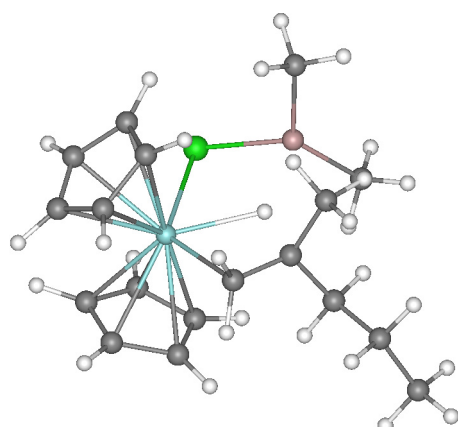

Zero-point vibrational energy

1109215.9 (Joules/Mol)

265.10896 (Kcal/Mol)

Zero-point correction

0.422478 (Hartree/Particle)

Thermal correction to Energy

0.448209

|                                             |              |
|---------------------------------------------|--------------|
| Thermal correction to Enthalpy              | 0.449153     |
| Thermal correction to Gibbs Free Energy     | 0.367905     |
| Sum of electronic and zero-point Energies   | -4945.877504 |
| Sum of electronic and thermal Energies      | -4945.851774 |
| Sum of electronic and thermal Enthalpies    | -4945.850829 |
| Sum of electronic and thermal Free Energies | -4945.932077 |

| cartesian |             |             |             |   |             |                         |
|-----------|-------------|-------------|-------------|---|-------------|-------------------------|
| 6         | -0.65492600 | -2.45834994 | 1.22455001  | 6 | 1.75667405  | 2.34835005 2.13194990   |
| 6         | -2.00132608 | -2.69575000 | 0.86074996  | 1 | 0.88317400  | 4.09644985 -0.99984998  |
| 6         | -2.82352614 | -1.88354993 | 1.69704986  | 1 | -0.61442602 | 3.26364994 -1.41534996  |
| 6         | -1.98232603 | -1.12915003 | 2.53604984  | 1 | -0.62872601 | 4.56134987 -0.22985002  |
| 6         | -0.63152599 | -1.45795000 | 2.22665000  | 1 | 1.68027401  | 3.16904998 2.85564995   |
| 1         | 0.24637401  | -1.05875003 | 2.72144985  | 1 | 1.76037383  | 1.42035007 2.71224999   |
| 1         | 0.20387399  | -2.97224998 | 0.81604999  | 1 | 2.73317385  | 2.45274997 1.64754987   |
| 1         | -2.34652591 | -3.41284990 | 0.12584996  | 6 | 0.16907400  | -1.12564993 -1.39645004 |
| 1         | -3.90572596 | -1.85895002 | 1.70114994  | 6 | 1.09647393  | -0.17874998 -0.89035004 |
| 1         | -2.30502605 | -0.41514999 | 3.28164983  | 6 | 1.51957393  | 0.96364999 -1.79135013  |
| 6         | -2.29072595 | 0.72075003  | -2.04365015 | 6 | 2.15647388  | -0.63604999 0.09484997  |
| 6         | -2.78782606 | -0.61675000 | -2.02955008 | 1 | 0.34837401  | -2.16864991 -1.15534997 |
| 6         | -3.75852609 | -0.70515001 | -1.00865006 | 1 | -0.17562598 | -0.95535004 -2.41235018 |
| 6         | -3.83352613 | 0.55445004  | -0.35625005 | 1 | 2.08567405  | 1.72784996 -1.25014997  |
| 6         | -2.94892597 | 1.44115007  | -1.02835011 | 1 | 2.17507386  | 0.54405004 -2.56165004  |
| 1         | -2.79392600 | 2.48315001  | -0.77845001 | 1 | 0.67357403  | 1.43445003 -2.29325008  |
| 1         | -1.56482601 | 1.12185001  | -2.74065018 | 6 | 3.35767388  | -1.24994993 -0.64925003 |
| 1         | -2.50552607 | -1.41355002 | -2.70565009 | 1 | 2.50517392  | 0.20535001 0.70144999   |
| 1         | -4.33952570 | -1.58544993 | -0.76575005 | 1 | 1.74527383  | -1.38265002 0.77924997  |
| 1         | -4.48142576 | 0.81375003  | 0.47224995  | 6 | 4.35527372  | -1.85874999 0.33544996  |
| 40        | -1.56362605 | -0.33604997 | 0.15934998  | 1 | 3.85627413  | -0.47904998 -1.24425006 |
| 17        | -1.66102600 | 1.88625002  | 1.84504986  | 1 | 3.00587392  | -2.01615000 -1.34864998 |
| 1         | 0.23197401  | 0.71495003  | 0.10064997  | 1 | 5.21427393  | -2.27784991 -0.19185004 |
| 13        | 0.26827401  | 2.47285008  | 0.89244998  | 1 | 3.89377403  | -2.66225004 0.91634995  |
| 6         | -0.04942602 | 3.70024991  | -0.58475006 | 1 | 4.72647381  | -1.10595000 1.03594995  |

# I-5Cl

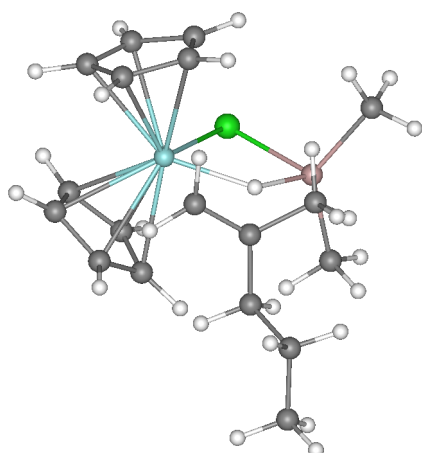

|                                             |                             |
|---------------------------------------------|-----------------------------|
| Zero-point vibrational energy               | 1111432.5 (Joules/Mol)      |
|                                             | 265.63873 (Kcal/Mol)        |
| Zero-point correction                       | 0.423322 (Hartree/Particle) |
| Thermal correction to Energy                | 0.450254                    |
| Thermal correction to Enthalpy              | 0.451199                    |
| Thermal correction to Gibbs Free Energy     | 0.365918                    |
| Sum of electronic and zero-point Energies   | -4945.888445                |
| Sum of electronic and thermal Energies      | -4945.861513                |
| Sum of electronic and thermal Enthalpies    | -4945.860569                |
| Sum of electronic and thermal Free Energies | -4945.945849                |

| cartesian |             |             |             |   |             |             |             |  |  |  |  |
|-----------|-------------|-------------|-------------|---|-------------|-------------|-------------|--|--|--|--|
| 6         | -0.52789795 | -2.31204200 | 1.42805803  | 6 | 1.09200203  | 2.66735792  | 2.04695797  |  |  |  |  |
| 6         | -1.91659796 | -2.55604196 | 1.37955797  | 1 | 0.58060205  | 4.04815817  | -1.36214197 |  |  |  |  |
| 6         | -2.56339788 | -1.54694211 | 2.15365791  | 1 | -0.90289795 | 3.20575809  | -1.80704200 |  |  |  |  |
| 6         | -1.56049800 | -0.70564210 | 2.69035792  | 1 | -0.96549797 | 4.60625792  | -0.74264205 |  |  |  |  |
| 6         | -0.30269796 | -1.14644206 | 2.21265793  | 1 | 1.01990199  | 3.62675810  | 2.57135797  |  |  |  |  |
| 1         | 0.65870202  | -0.71334207 | 2.45875788  | 1 | 0.94660199  | 1.88505793  | 2.79995775  |  |  |  |  |
| 1         | 0.23340201  | -2.93374205 | 0.97785795  | 1 | 2.12420225  | 2.59225798  | 1.68505800  |  |  |  |  |
| 1         | -2.39639807 | -3.38744187 | 0.87905800  | 6 | 0.42090201  | -1.43794203 | -1.52874196 |  |  |  |  |
| 1         | -3.62729788 | -1.46674204 | 2.34115791  | 6 | 1.33890212  | -0.51464206 | -1.13394201 |  |  |  |  |
| 1         | -1.72999799 | 0.15235795  | 3.32645798  | 6 | 1.57480204  | 0.73045790  | -1.94504201 |  |  |  |  |
| 6         | -2.35969782 | -0.03494206 | -2.22314215 | 6 | 2.27900219  | -0.73934209 | 0.01675797  |  |  |  |  |
| 6         | -2.69549799 | -1.37484205 | -1.85184205 | 1 | 0.40920198  | -2.43504190 | -1.09844196 |  |  |  |  |
| 6         | -3.70929813 | -1.30594206 | -0.86754203 | 1 | -0.06849796 | -1.31904209 | -2.49014211 |  |  |  |  |
| 6         | -3.95029783 | 0.05685795  | -0.57584202 | 1 | 1.90080202  | 1.56545794  | -1.31724203 |  |  |  |  |
| 6         | -3.13279819 | 0.84055793  | -1.44244206 | 1 | 2.38160181  | 0.53085792  | -2.65954208 |  |  |  |  |
| 1         | -3.10099792 | 1.92255795  | -1.47094202 | 1 | 0.69100201  | 1.03335798  | -2.51044202 |  |  |  |  |
| 1         | -1.64979792 | 0.26255795  | -2.98514223 | 6 | 3.74280214  | -0.83174211 | -0.45764205 |  |  |  |  |

|    |             |             |             |   |            |             |             |
|----|-------------|-------------|-------------|---|------------|-------------|-------------|
| 1  | -2.29869795 | -2.28274202 | -2.28974223 | 1 | 2.19360209 | 0.10035795  | 0.72045791  |
| 1  | -4.20229816 | -2.14974189 | -0.40224203 | 1 | 2.02340221 | -1.65804207 | 0.55435795  |
| 1  | -4.65759802 | 0.44565794  | 0.14635795  | 6 | 4.68240213 | -1.12684202 | 0.71005797  |
| 40 | -1.60219789 | -0.38744205 | 0.17165796  | 1 | 4.03550196 | 0.10845795  | -0.93424201 |
| 17 | -2.27229786 | 2.00445795  | 1.36645794  | 1 | 3.82700205 | -1.61614203 | -1.21694195 |
| 1  | -0.14999795 | 0.92485791  | 0.03655796  | 1 | 5.71870232 | -1.17784202 | 0.37095797  |
| 13 | -0.19959795 | 2.57145810  | 0.59305799  | 1 | 4.43800211 | -2.08214188 | 1.18265796  |
| 6  | -0.38709795 | 3.70615792  | -0.97954202 | 1 | 4.61680222 | -0.34524205 | 1.47235799  |

## S1.5. Me<sub>3</sub>Al reaction profile

I-OMe

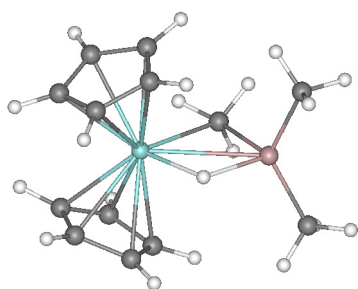

|                                             |                             |
|---------------------------------------------|-----------------------------|
| Zero-point vibrational energy               | 756308.5 (Joules/Mol)       |
|                                             | 180.76206 (Kcal/Mol)        |
| Zero-point correction                       | 0.288063 (Hartree/Particle) |
| Thermal correction to Energy                | 0.306404                    |
| Thermal correction to Enthalpy              | 0.307348                    |
| Thermal correction to Gibbs Free Energy     | 0.241768                    |
| Sum of electronic and zero-point Energies   | -4289.944549                |
| Sum of electronic and thermal Energies      | -4289.926207                |
| Sum of electronic and thermal Enthalpies    | -4289.925263                |
| Sum of electronic and thermal Free Energies | -4289.990843                |

| cartesian |             |             |             |    |             |             |
|-----------|-------------|-------------|-------------|----|-------------|-------------|
| 6         | 1.87194288  | 2.07636285  | -0.97703713 | 1  | 0.53124285  | -2.24743700 |
| 6         | 2.60044265  | 1.72656274  | 0.18646285  | 1  | -0.33765718 | -2.96673703 |
| 6         | 1.73514283  | 1.86256278  | 1.30386281  | 40 | 0.79464281  | 0.01516281  |
| 6         | 0.47844282  | 2.33396292  | 0.83226287  | 6  | -0.98575711 | -0.15933719 |
| 6         | 0.55694282  | 2.45326281  | -0.57603717 | 1  | -0.67775714 | -0.04123720 |
| 1         | -0.23205718 | 2.80126286  | -1.23163712 | 13 | -2.17385721 | -0.05953719 |
| 1         | 2.25974274  | 2.09016299  | -1.98973703 | 6  | -3.00885725 | -1.80603719 |
| 1         | 3.63704276  | 1.41396272  | 0.21836285  | 6  | -3.00695729 | 1.69266284  |
| 1         | 1.99694288  | 1.68186283  | 2.33976293  | 1  | -4.01125717 | -1.71743727 |
| 1         | -0.38615718 | 2.56306291  | 1.44276285  | 1  | -3.12455726 | -2.33653712 |
| 6         | 2.69874263  | -1.56183720 | -0.30443716 | 1  | -2.43865728 | -2.46363711 |
| 6         | 2.35464263  | -1.53013718 | 1.07676280  | 1  | -3.19015718 | 1.94626284  |
| 6         | 1.06844282  | -2.10943699 | 1.22216284  | 1  | -2.42955732 | 2.51636291  |
| 6         | 0.61064279  | -2.49113703 | -0.06833715 | 1  | -3.98955750 | 1.70446277  |
| 6         | 1.62264287  | -2.16513705 | -1.00583720 | 1  | -1.27295721 | -1.15063727 |
| 1         | 1.58214283  | -2.34603715 | -2.07423711 | 1  | -0.05875719 | 0.08756280  |
| 1         | 3.63274264  | -1.22593725 | -0.73823714 | 1  | -1.68745720 | 0.56886280  |
| 1         | 2.97944283  | -1.15613723 | 1.87866282  |    |             |             |

## I-1Me

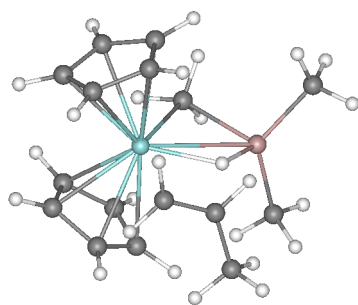

|                                             |                             |
|---------------------------------------------|-----------------------------|
| Zero-point vibrational energy               | 976497.1 (Joules/Mol)       |
|                                             | 233.38840 (Kcal/Mol)        |
| Zero-point correction                       | 0.371928 (Hartree/Particle) |
| Thermal correction to Energy                | 0.395214                    |
| Thermal correction to Enthalpy              | 0.396158                    |
| Thermal correction to Gibbs Free Energy     | 0.321046                    |
| Sum of electronic and zero-point Energies   | -4407.715485                |
| Sum of electronic and thermal Energies      | -4407.692199                |
| Sum of electronic and thermal Enthalpies    | -4407.691255                |
| Sum of electronic and thermal Free Energies | -4407.766368                |

| cartesian |             |             |             |    |             |             |             |
|-----------|-------------|-------------|-------------|----|-------------|-------------|-------------|
| 6         | 1.21529317  | 2.30450678  | 0.81071818  | 1  | -0.93450677 | -0.01689314 | -0.67538184 |
| 6         | 2.21419334  | 1.53380692  | 1.44131815  | 13 | -2.16730666 | -0.83109313 | 0.20821816  |
| 6         | 1.57749319  | 0.70910686  | 2.41421819  | 6  | -2.83330679 | -2.28829312 | -0.90168184 |
| 6         | 0.19079325  | 0.99730688  | 2.38501835  | 6  | -3.28770685 | 0.50490683  | 1.09581816  |
| 6         | -0.04490677 | 1.95500696  | 1.36941814  | 1  | -3.56970668 | -1.93279314 | -1.63078189 |
| 1         | -1.00500679 | 2.38860679  | 1.11671817  | 1  | -2.04750681 | -2.80169320 | -1.46698189 |
| 1         | 1.38589323  | 3.06210685  | 0.05921817  | 1  | -3.34420681 | -3.04949331 | -0.30058181 |
| 1         | 3.27779317  | 1.58660686  | 1.24391818  | 1  | -4.19280720 | 0.03500685  | 1.49871814  |
| 1         | 2.07429314  | 0.02450686  | 3.09171820  | 1  | -2.81100678 | 1.02810693  | 1.93241811  |
| 1         | -0.56430674 | 0.55330688  | 3.02071834  | 1  | -3.64310670 | 1.27370691  | 0.39891815  |
| 6         | 1.75029325  | -1.58899307 | -1.64098179 | 6  | 1.17199326  | 1.48630691  | -2.30208182 |
| 6         | 2.83529329  | -0.86309314 | -1.06218183 | 6  | -0.17760676 | 1.48910689  | -2.31828165 |
| 6         | 3.02439332  | -1.34769309 | 0.25461817  | 6  | -1.05470681 | 2.59780669  | -1.82328188 |
| 6         | 2.03559327  | -2.32319331 | 0.51081818  | 1  | 1.74019325  | 2.32980680  | -1.92098176 |
| 6         | 1.25589323  | -2.48109317 | -0.67168182 | 1  | 1.72429323  | 0.74990684  | -2.87328172 |
| 1         | 0.43099326  | -3.16959310 | -0.80648184 | 1  | -1.51300681 | 3.08470678  | -2.69058180 |
| 1         | 1.36689329  | -1.48649311 | -2.64888167 | 1  | -1.87110686 | 2.21820688  | -1.20268190 |
| 1         | 3.45419335  | -0.12359314 | -1.55478179 | 1  | -0.49610674 | 3.35640669  | -1.27168190 |
| 1         | 3.78859329  | -1.02029312 | 0.94831812  | 1  | -1.58510673 | -1.53429306 | 2.20991826  |
| 1         | 1.92019320  | -2.88619328 | 1.42831814  | 1  | 0.09719324  | -1.64719307 | 2.24221826  |
| 40        | 0.80119324  | -0.13319315 | 0.20031816  | 1  | -0.77830672 | -2.72949314 | 1.19101810  |
| 6         | -0.72900677 | -1.68909311 | 1.52671814  | 1  | -0.68260676 | 0.67490685  | -2.83608174 |

## TS-1Me

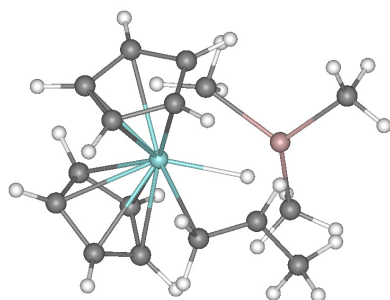

|                                             |                             |
|---------------------------------------------|-----------------------------|
| Zero-point vibrational energy               | 975298.2 (Joules/Mol)       |
|                                             | 233.10186 (Kcal/Mol)        |
| Zero-point correction                       | 0.371471 (Hartree/Particle) |
| Thermal correction to Energy                | 0.393554                    |
| Thermal correction to Enthalpy              | 0.394498                    |
| Thermal correction to Gibbs Free Energy     | 0.322593                    |
| Sum of electronic and zero-point Energies   | -4407.708612                |
| Sum of electronic and thermal Energies      | -4407.686530                |
| Sum of electronic and thermal Enthalpies    | -4407.685585                |
| Sum of electronic and thermal Free Energies | -4407.757490                |

| cartesian |             |             |             |    |                                     |
|-----------|-------------|-------------|-------------|----|-------------------------------------|
| 6         | -1.17124319 | 2.48448658  | 0.28614089  | 6  | 0.73735678 0.21368636 -2.15925908   |
| 6         | -2.05224323 | 1.90878642  | 1.24614096  | 6  | -0.53704315 -0.29631364 -2.42135906 |
| 6         | -3.08704329 | 1.24798632  | 0.54944092  | 1  | 0.89485681 0.28268635 -0.57145911   |
| 6         | -2.84084320 | 1.38428640  | -0.84205908 | 1  | 2.85695672 -0.19271363 -1.88005912  |
| 6         | -1.67134321 | 2.17648649  | -0.99635911 | 1  | 1.84825683 -1.64531362 -2.08315897  |
| 1         | -1.23754311 | 2.49408650  | -1.93685913 | 1  | -1.29274321 0.35598636 -2.84415913  |
| 1         | -0.29034317 | 3.07658648  | 0.50254089  | 1  | -0.59564316 -1.33971369 -2.71375918 |
| 1         | -1.96544313 | 1.99288642  | 2.32174087  | 13 | 2.02805686 0.34808636 0.87544090    |
| 1         | -3.92684317 | 0.73688638  | 1.00234091  | 6  | 0.49965683 0.58448637 2.22494102    |
| 1         | -3.46574330 | 0.99908638  | -1.63895905 | 6  | 2.92665672 -1.39001369 0.91324091   |
| 6         | -1.83184314 | -1.76481366 | 1.63324094  | 6  | 2.91675687 2.05048656 0.53204089    |
| 6         | -2.64214325 | -1.86801362 | 0.46884087  | 1  | 3.61145687 1.98828638 -0.31335911   |
| 6         | -1.83134317 | -2.32191348 | -0.59095907 | 1  | 2.22685671 2.87568641 0.32404089    |
| 6         | -0.51214314 | -2.51701355 | -0.08405910 | 1  | 3.52115679 2.35828638 1.39364088    |
| 6         | -0.52454317 | -2.19951344 | 1.29124093  | 1  | 3.86785674 -1.36251366 0.35314089   |
| 1         | 0.32635686  | -2.25181341 | 1.95974088  | 1  | 3.19495678 -1.67191362 1.93954086   |
| 1         | -2.17154312 | -1.46571362 | 2.61774087  | 1  | 2.34265685 -2.22381353 0.50824088   |
| 1         | -3.70094323 | -1.65311360 | 0.40564087  | 1  | 1.21485686 0.10158636 2.91954088    |
| 1         | -2.17024302 | -2.52531362 | -1.59775913 | 1  | 0.52415681 1.65468633 2.45334101    |
| 1         | 0.33765683  | -2.89011359 | -0.64345908 | 1  | -0.44134316 0.20198636 2.62354088   |
| 40        | -0.96274316 | -0.03001363 | 0.04884089  | 1  | 2.18425679 -0.59471363 -3.46585917  |
| 6         | 1.98415685  | -0.60631365 | -2.38955903 | 1  | 0.87795687 1.29318631 -2.22185898   |

# I-2Me\_a

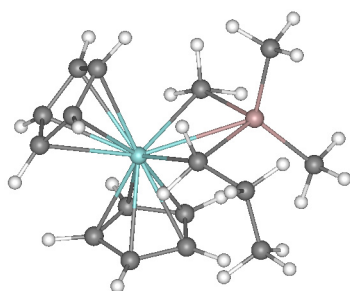

|                                             |                             |
|---------------------------------------------|-----------------------------|
| Zero-point vibrational energy               | 988223.4 (Joules/Mol)       |
|                                             | 236.19106 (Kcal/Mol)        |
| Zero-point correction                       | 0.376394 (Hartree/Particle) |
| Thermal correction to Energy                | 0.398577                    |
| Thermal correction to Enthalpy              | 0.399521                    |
| Thermal correction to Gibbs Free Energy     | 0.327728                    |
| Sum of electronic and zero-point Energies   | -4407.738140                |
| Sum of electronic and thermal Energies      | -4407.715958                |
| Sum of electronic and thermal Enthalpies    | -4407.715014                |
| Sum of electronic and thermal Free Energies | -4407.786807                |

| cartesian |             |             |             |   |                                     |
|-----------|-------------|-------------|-------------|---|-------------------------------------|
| 6         | -1.66079998 | 1.92719996  | -1.37240005 | 6 | 3.15790009 0.67970002 -1.43840003   |
| 6         | -2.06949997 | 2.16249990  | -0.03370000 | 1 | 3.54579997 -2.72350001 -0.00020000  |
| 6         | -0.91219997 | 2.41890001  | 0.73920000  | 1 | 2.92630005 -2.98379993 -1.61539996  |
| 6         | 0.21430001  | 2.37820005  | -0.13230000 | 1 | 1.90009999 -3.30150008 -0.22260000  |
| 6         | -0.24730000 | 2.07940006  | -1.43210006 | 1 | 2.71280003 1.67949998 -1.49199998   |
| 1         | 0.36690000  | 1.98959994  | -2.31979990 | 1 | 3.44449997 0.41530001 -2.46499991   |
| 1         | -2.31739998 | 1.71809995  | -2.20930004 | 1 | 4.10330009 0.78240001 -0.89279997   |
| 1         | 1.24039996  | 2.56640005  | 0.14900000  | 6 | 1.26370001 -0.42309999 1.28069997   |
| 6         | -2.25149989 | -1.92060006 | -0.55269998 | 6 | 2.62809992 0.01370000 1.89479995    |
| 6         | -3.06229997 | -0.89109999 | -0.02120000 | 6 | 2.88809991 1.51590002 1.91589999    |
| 6         | -2.69039989 | -0.70039999 | 1.34070003  | 1 | 0.52460003 0.20100001 1.84840000    |
| 6         | -1.65970004 | -1.62489998 | 1.64100003  | 1 | 1.08669996 -1.44830000 1.62399995   |
| 6         | -1.36919999 | -2.36360002 | 0.46799999  | 1 | 3.45849991 -0.49300000 1.38590002   |
| 1         | -0.62540001 | -3.14549994 | 0.37009999  | 1 | 3.78940010 1.73130000 2.49410009    |
| 1         | -2.29710007 | -2.30629992 | -1.56369996 | 1 | 2.06019998 2.05430007 2.39050007    |
| 1         | -3.84629989 | -0.36149999 | -0.54830003 | 1 | 3.04480004 1.91960001 0.91380000    |
| 40        | -0.73559999 | 0.03820000  | -0.02920000 | 1 | -1.17209995 -1.73549998 2.60209990  |
| 1         | -3.08850002 | 2.14730000  | 0.33199999  | 1 | -0.89200002 2.64870000 1.79869998   |
| 1         | -3.14339995 | -0.00460000 | 2.03640008  | 1 | 0.23170000 -2.00000000 -2.10069990  |
| 6         | 0.26240000  | -0.91189998 | -1.99090004 | 1 | 0.97570002 -0.52160001 -2.73210001  |
| 13        | 2.04410005  | -0.75529999 | -0.70889997 | 1 | -0.68980002 -0.55260003 -2.42389989 |
| 6         | 2.65070009  | -2.60929990 | -0.62260002 | 1 | 2.65510011 -0.36849999 2.91969991   |

## I-2Me\_bi

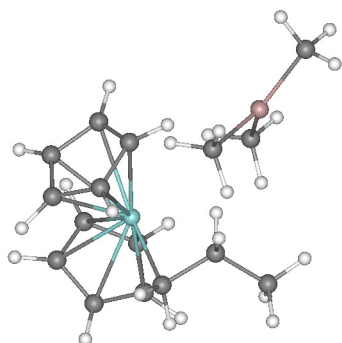

|                                             |                             |
|---------------------------------------------|-----------------------------|
| Zero-point vibrational energy               | 983941.6 (Joules/Mol)       |
|                                             | 235.16768 (Kcal/Mol)        |
| Zero-point correction                       | 0.374764 (Hartree/Particle) |
| Thermal correction to Energy                | 0.398247                    |
| Thermal correction to Enthalpy              | 0.399191                    |
| Thermal correction to Gibbs Free Energy     | 0.319781                    |
| Sum of electronic and zero-point Energies   | -4407.722020                |
| Sum of electronic and thermal Energies      | -4407.698537                |
| Sum of electronic and thermal Enthalpies    | -4407.697592                |
| Sum of electronic and thermal Free Energies | -4407.777003                |

|   |             |             |             | cartesian |             |             |             |
|---|-------------|-------------|-------------|-----------|-------------|-------------|-------------|
| 6 | 2.30430007  | 1.86909997  | -0.94700003 | 1         | 0.02810000  | 1.63789999  | 1.23450005  |
| 6 | 2.74790001  | 0.67570001  | -1.56710005 | 13        | -3.87030005 | 0.08950000  | -0.22380000 |
| 6 | 1.70589995  | 0.21060000  | -2.41759992 | 6         | -4.35699987 | -1.76950002 | 0.08350000  |
| 6 | 0.61269999  | 1.09410000  | -2.29299998 | 6         | -4.99149990 | 1.62890005  | -0.58870000 |
| 6 | 0.97799999  | 2.11820006  | -1.37390006 | 1         | -5.43720007 | -1.93649995 | 0.05000000  |
| 1 | 0.36730000  | 2.96639991  | -1.08780003 | 1         | -4.00869989 | -2.12220001 | 1.06200004  |
| 1 | 2.88150001  | 2.48490000  | -0.27100000 | 1         | -3.90750003 | -2.43600011 | -0.66310000 |
| 1 | 3.72449994  | 0.22310001  | -1.44560003 | 1         | -6.05569983 | 1.38230002  | -0.62730002 |
| 1 | 1.74460006  | -0.66570002 | -3.05229998 | 1         | -4.72690010 | 2.09829998  | -1.54330003 |
| 1 | -0.33019999 | 1.01680005  | -2.82069993 | 1         | -4.86049986 | 2.40240002  | 0.17700000  |
| 6 | 0.64859998  | -2.08949995 | 1.44089997  | 6         | 1.98780000  | 0.74839997  | 1.75899994  |
| 6 | 1.96949995  | -2.10529995 | 0.91119999  | 6         | 0.84780002  | 1.73169994  | 2.00340009  |
| 6 | 1.87399995  | -2.29270005 | -0.48550001 | 6         | 0.15090001  | 1.58070004  | 3.35829997  |
| 6 | 0.49360001  | -2.38829994 | -0.82880002 | 1         | 2.95810008  | 1.22790003  | 1.64510000  |
| 6 | -0.25170001 | -2.29859996 | 0.37250000  | 1         | 2.05089998  | 0.01730000  | 2.56640005  |
| 1 | -1.33120000 | -2.36209989 | 0.45390001  | 1         | -0.68470001 | 2.27659988  | 3.46300006  |
| 1 | 0.38499999  | -1.97880006 | 2.48629999  | 1         | 0.86040002  | 1.77260005  | 4.16569996  |
| 1 | 2.88619995  | -2.00629997 | 1.47720003  | 1         | -0.23170000 | 0.56300002  | 3.48790002  |
| 1 | 2.70670009  | -2.37400007 | -1.17240000 | 1         | -1.65369999 | 1.46519995  | -0.30599999 |

|    |             |             |             |   |             |             |             |
|----|-------------|-------------|-------------|---|-------------|-------------|-------------|
| 1  | 0.09210000  | -2.56719995 | -1.81889999 | 1 | -1.62220001 | 0.07610000  | 0.88270003  |
| 40 | 0.89340001  | -0.03970000 | -0.05350000 | 1 | -1.48500001 | -0.25080001 | -0.91409999 |
| 6  | -1.87919998 | 0.41180000  | -0.13100000 | 1 | 1.17700005  | 2.76209998  | 1.84119999  |

### I-2Me\_bo

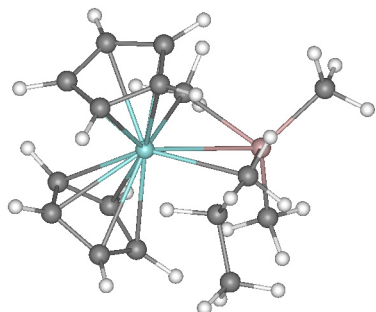

|                                             |                             |
|---------------------------------------------|-----------------------------|
| Zero-point vibrational energy               | 990513.4 (Joules/Mol)       |
|                                             | 236.73838 (Kcal/Mol)        |
| Zero-point correction                       | 0.377267 (Hartree/Particle) |
| Thermal correction to Energy                | 0.399244                    |
| Thermal correction to Enthalpy              | 0.400188                    |
| Thermal correction to Gibbs Free Energy     | 0.328627                    |
| Sum of electronic and zero-point Energies   | -4407.740304                |
| Sum of electronic and thermal Energies      | -4407.718327                |
| Sum of electronic and thermal Enthalpies    | -4407.717383                |
| Sum of electronic and thermal Free Energies | -4407.788944                |

### cartesian

|   |             |             |             |   |             |             |             |
|---|-------------|-------------|-------------|---|-------------|-------------|-------------|
| 6 | 1.81025004  | -1.84350681 | -1.33039093 | 6 | -2.93874979 | -2.28250670 | 0.10210910  |
| 6 | 2.87745023  | -0.96920681 | -0.98009092 | 1 | -3.25204992 | 1.68839324  | 0.22940910  |
| 6 | 3.13735008  | -1.13940680 | 0.40530911  | 1 | -2.56874990 | 1.61699319  | 1.84880900  |
| 6 | 2.21115017  | -2.07810688 | 0.91280907  | 1 | -4.02355003 | 0.72079319  | 1.46250916  |
| 6 | 1.38884997  | -2.51450682 | -0.16459090 | 1 | -3.46894979 | -2.68030667 | 0.97530907  |
| 1 | 0.58725011  | -3.24040675 | -0.10249090 | 1 | -2.24534988 | -3.06560683 | -0.22799090 |
| 1 | 1.39125013  | -1.96950674 | -2.32099080 | 1 | -3.69334984 | -2.17490673 | -0.68569088 |
| 1 | 3.43315005  | -0.33320680 | -1.65939093 | 6 | -0.62824988 | 1.90789318  | -2.70649076 |
| 1 | 2.15575004  | -2.42750669 | 1.93640900  | 6 | -0.96934992 | -0.26360682 | -1.36899090 |
| 6 | 0.05075008  | 2.28669333  | 0.72270912  | 6 | -0.04044992 | 0.56379318  | -2.27699089 |
| 6 | 1.27375007  | 2.44809318  | 0.01310910  | 1 | 0.23055008  | -0.02480681 | -3.15729094 |
| 6 | 2.31675005  | 1.91159320  | 0.79920912  | 1 | -1.02144980 | -1.29450679 | -1.73029089 |
| 6 | 1.74664998  | 1.42759323  | 2.01150918  | 1 | -1.97174978 | 0.16179320  | -1.53119087 |
| 6 | 0.35485008  | 1.68639326  | 1.96880913  | 1 | 0.97465008  | 0.78549320  | -1.84809089 |
| 1 | -0.35774994 | 1.45909321  | 2.75130916  | 1 | -0.96114987 | 2.49669313  | -1.84829092 |
| 1 | -0.92854995 | 2.62649322  | 0.41110909  | 1 | -1.49615002 | 1.73639321  | -3.34749079 |

|    |             |             |             |   |             |             |             |
|----|-------------|-------------|-------------|---|-------------|-------------|-------------|
| 1  | 1.38985014  | 2.91549325  | -0.95769089 | 1 | 3.36695004  | 1.89919317  | 0.53590906  |
| 1  | 2.28995013  | 0.98279315  | 2.83730912  | 1 | 3.91155005  | -0.64010686 | 0.97410911  |
| 40 | 0.86915010  | -0.05340681 | 0.20040910  | 1 | 0.32335010  | -0.96310681 | 2.53970909  |
| 6  | -0.54454988 | -1.17110682 | 1.90180922  | 1 | -0.60974991 | -2.25980687 | 1.82470918  |
| 13 | -2.06344986 | -0.59000683 | 0.51100910  | 1 | -1.36084986 | -0.85210681 | 2.57420921  |
| 6  | -3.04274988 | 1.01209319  | 1.06810904  | 1 | 0.09575009  | 2.49749327  | -3.27329087 |

### I-4Me\_a

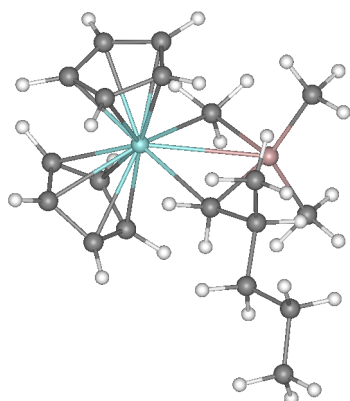

|                                             |                             |
|---------------------------------------------|-----------------------------|
| Zero-point vibrational energy               | 1214479.1 (Joules/Mol)      |
|                                             | 290.26747 (Kcal/Mol)        |
| Zero-point correction                       | 0.462571 (Hartree/Particle) |
| Thermal correction to Energy                | 0.488850                    |
| Thermal correction to Enthalpy              | 0.489795                    |
| Thermal correction to Gibbs Free Energy     | 0.408318                    |
| Sum of electronic and zero-point Energies   | -4525.541047                |
| Sum of electronic and thermal Energies      | -4525.514768                |
| Sum of electronic and thermal Enthalpies    | -4525.513823                |
| Sum of electronic and thermal Free Energies | -4525.595301                |

| cartesian |            |             |             |   |             |             |             |
|-----------|------------|-------------|-------------|---|-------------|-------------|-------------|
| 6         | 3.68165469 | 1.04619050  | 1.27288687  | 1 | -0.07034528 | 3.89369059  | -1.44131315 |
| 6         | 3.30075479 | 0.02129056  | 2.17718673  | 1 | -1.43244529 | 3.37219048  | -0.48331314 |
| 6         | 1.96095467 | 0.25649056  | 2.56698680  | 6 | -2.88064528 | -1.00580943 | 0.45018685  |
| 6         | 1.52265477 | 1.45279050  | 1.92898679  | 6 | -0.52264529 | -0.27410945 | -0.04671317 |
| 6         | 2.58315468 | 1.94009042  | 1.13518679  | 6 | -1.95584512 | 0.21909055  | 0.33348686  |
| 1         | 2.56505466 | 2.83849049  | 0.53068686  | 6 | -1.96624517 | 1.07329059  | 1.59948683  |
| 1         | 4.65525436 | 1.15379047  | 0.80818683  | 1 | -0.17024529 | -0.75060946 | 0.90638685  |
| 1         | 0.55525476 | 1.91749048  | 2.05418682  | 1 | -0.66624528 | -1.10710943 | -0.74451315 |
| 6         | 3.13125491 | -1.70420945 | -1.57491314 | 1 | -2.36204529 | 0.83139056  | -0.48751318 |
| 6         | 3.67055488 | -1.99910951 | -0.30091316 | 1 | -2.98474526 | 1.37039053  | 1.85768688  |
| 6         | 2.65125489 | -2.62810946 | 0.47038680  | 1 | -1.55784512 | 0.51259053  | 2.45008683  |

|    |             |             |             |   |             |             |             |
|----|-------------|-------------|-------------|---|-------------|-------------|-------------|
| 6  | 1.49275470  | -2.72320938 | -0.33891320 | 1 | -1.39434528 | 1.99439049  | 1.47138679  |
| 6  | 1.77815485  | -2.13200951 | -1.59441316 | 1 | -2.83414531 | -1.56380951 | -0.49391317 |
| 1  | 1.09455466  | -2.04220939 | -2.43031335 | 1 | -2.48724532 | -1.67580950 | 1.22888684  |
| 1  | 3.65915489  | -1.23150945 | -2.39371324 | 1 | 0.54705477  | -3.15880942 | -0.03841317 |
| 1  | 4.68705463  | -1.80790949 | 0.02048683  | 1 | 1.38455474  | -0.34510943 | 3.26078677  |
| 40 | 1.90465474  | -0.26570946 | 0.11468682  | 6 | -4.34614563 | -0.68260950 | 0.75018686  |
| 1  | 3.92595482  | -0.79810947 | 2.50868678  | 1 | 1.98875475  | 0.69179052  | -2.78671336 |
| 1  | 2.75435472  | -3.00700951 | 1.47978687  | 1 | 1.95465469  | 2.24529052  | -1.93591321 |
| 6  | 2.06885481  | 1.15929055  | -1.80091321 | 1 | 3.14225483  | 1.10259056  | -1.54141319 |
| 13 | -0.09464526 | 1.36059058  | -1.37651312 | 6 | -5.23174524 | -1.92240942 | 0.62518686  |
| 6  | -0.87114531 | 0.75739056  | -3.06461334 | 1 | -4.69654560 | 0.09299055  | 0.05868683  |
| 6  | -0.37304527 | 3.16649055  | -0.67611319 | 1 | -4.44424534 | -0.27290946 | 1.75968683  |
| 1  | -1.96664524 | 0.79429054  | -3.05541325 | 1 | -6.27254534 | -1.68920946 | 0.85858685  |
| 1  | -0.55614525 | 1.39359057  | -3.90001321 | 1 | -4.90284538 | -2.70780945 | 1.31198680  |
| 1  | -0.59354526 | -0.26970944 | -3.33071327 | 1 | -5.19804525 | -2.32850957 | -0.38971317 |
| 1  | 0.17175475  | 3.43549061  | 0.23588683  |   |             |             |             |

#### I-4Me\_bi

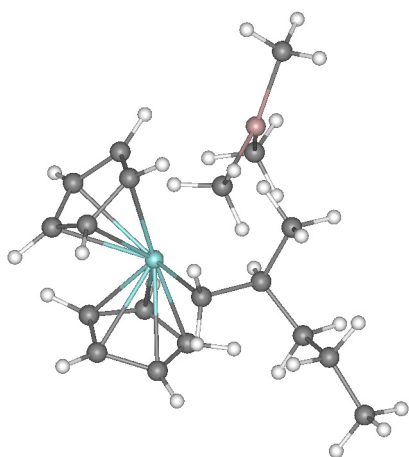

|                                             |                             |
|---------------------------------------------|-----------------------------|
| Zero-point vibrational energy               | 1209446.8 (Joules/Mol)      |
|                                             | 289.06473 (Kcal/Mol)        |
| Zero-point correction                       | 0.460654 (Hartree/Particle) |
| Thermal correction to Energy                | 0.487280                    |
| Thermal correction to Enthalpy              | 0.488224                    |
| Thermal correction to Gibbs Free Energy     | 0.403106                    |
| Sum of electronic and zero-point Energies   | -4525.525096                |
| Sum of electronic and thermal Energies      | -4525.498470                |
| Sum of electronic and thermal Enthalpies    | -4525.497526                |
| Sum of electronic and thermal Free Energies | -4525.582644                |

cartesian

|   |             |             |             |   |            |            |            |
|---|-------------|-------------|-------------|---|------------|------------|------------|
| 6 | -1.59097171 | -1.47669435 | -2.02832079 | 1 | 3.79692841 | 2.87390566 | 1.91007924 |
|---|-------------|-------------|-------------|---|------------|------------|------------|

|    |             |             |             |   |             |             |             |
|----|-------------|-------------|-------------|---|-------------|-------------|-------------|
| 6  | -1.06317163 | -2.77479434 | -1.82632077 | 1 | 4.59122801  | 1.33650565  | 2.18707919  |
| 6  | 0.32752836  | -2.73589420 | -2.13322091 | 1 | 5.49582815  | 2.29030561  | -2.03972077 |
| 6  | 0.65822840  | -1.41229439 | -2.48772073 | 1 | 4.89062834  | 0.67850566  | -2.40752077 |
| 6  | -0.52587163 | -0.62429434 | -2.40782094 | 1 | 3.89062834  | 2.07950568  | -2.74352074 |
| 1  | -0.60977161 | 0.42930564  | -2.64932084 | 6 | -1.97667158 | -0.63629436 | 0.79827923  |
| 1  | -2.62897158 | -1.19469428 | -1.92402077 | 6 | -1.49557161 | 0.79480565  | 0.58047920  |
| 1  | -1.63087165 | -3.65119433 | -1.53892076 | 6 | -1.10677171 | 1.50770569  | 1.88297927  |
| 1  | 1.01022840  | -3.57579422 | -2.10592079 | 6 | -2.44247150 | 1.63610578  | -0.29682076 |
| 1  | 1.63952827  | -1.05979431 | -2.78252077 | 1 | -2.90017152 | -0.86239433 | 0.26717925  |
| 6  | 0.31092834  | -1.98219430 | 2.42617917  | 1 | -2.11577153 | -0.86359429 | 1.85567927  |
| 6  | -0.43157163 | -3.03509426 | 1.82177925  | 1 | -0.74937165 | 2.52380562  | 1.68857932  |
| 6  | 0.40792835  | -3.67109442 | 0.88027924  | 1 | -1.96827161 | 1.56940579  | 2.55227923  |
| 6  | 1.66222835  | -2.99949431 | 0.87597924  | 1 | -0.31707165 | 0.96810567  | 2.41727924  |
| 6  | 1.60212839  | -1.97759426 | 1.86097932  | 6 | -3.75697160 | 2.00450563  | 0.39467925  |
| 1  | 2.40882850  | -1.30529428 | 2.12827921  | 1 | -1.93037164 | 2.55660582  | -0.60572076 |
| 1  | -0.04947165 | -1.31879437 | 3.20257926  | 1 | -2.66507149 | 1.07830572  | -1.21582067 |
| 1  | -1.45177162 | -3.31059432 | 2.05567908  | 1 | 1.47172832  | 0.86810565  | -0.99352080 |
| 1  | 0.14562836  | -4.52999449 | 0.27597925  | 1 | 1.65512836  | 0.65030575  | 0.81677920  |
| 1  | 2.52822852  | -3.27059436 | 0.28427926  | 1 | 2.41192842  | -0.55119431 | -0.34962076 |
| 40 | -0.00957164 | -1.38149428 | -0.04322076 | 6 | -4.72307158 | 2.69830561  | -0.56522077 |
| 6  | 2.08762836  | 0.48440567  | -0.17522076 | 1 | -3.55397153 | 2.66660571  | 1.24237931  |
| 1  | -0.54257166 | 0.80130565  | -0.03252076 | 1 | -4.22387171 | 1.10190570  | 0.80537921  |
| 13 | 3.82432842  | 1.51160574  | -0.24552077 | 1 | -5.64877176 | 2.97760582  | -0.05812076 |
| 6  | 4.49052811  | 2.15260577  | 1.46157932  | 1 | -4.98387194 | 2.04530573  | -1.40322077 |
| 6  | 4.60052824  | 1.66300559  | -2.01992083 | 1 | -4.28027201 | 3.60980582  | -0.97702080 |
| 1  | 5.46452808  | 2.64290571  | 1.38367927  |   |             |             |             |

### I-4Me\_bo

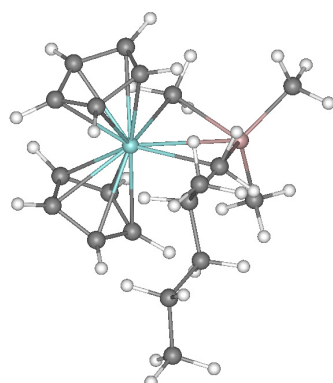

|                                |                             |
|--------------------------------|-----------------------------|
| Zero-point vibrational energy  | 1215723.6 (Joules/Mol)      |
|                                | 290.56491 (Kcal/Mol)        |
| Zero-point correction          | 0.463045 (Hartree/Particle) |
| Thermal correction to Energy   | 0.489087                    |
| Thermal correction to Enthalpy | 0.490031                    |

|                                             |              |
|---------------------------------------------|--------------|
| Thermal correction to Gibbs Free Energy     | 0.409666     |
| Sum of electronic and zero-point Energies   | -4525.542152 |
| Sum of electronic and thermal Energies      | -4525.516110 |
| Sum of electronic and thermal Enthalpies    | -4525.515166 |
| Sum of electronic and thermal Free Energies | -4525.595531 |

| cartesian |             |             |             |   |             |             |             |  |
|-----------|-------------|-------------|-------------|---|-------------|-------------|-------------|--|
| 6         | 1.77506614  | -1.37285662 | 2.06002069  | 1 | 2.92746615  | 3.83044338  | 1.07942069  |  |
| 6         | 1.02806616  | -2.47475672 | 1.55212069  | 1 | 2.52306604  | 2.50444341  | 2.16422081  |  |
| 6         | 1.74676621  | -3.02325654 | 0.46402076  | 1 | 1.40196621  | 3.84474325  | 1.93952060  |  |
| 6         | 2.92506599  | -2.25335670 | 0.28152072  | 6 | -2.54303384 | 0.38414335  | 0.41672072  |  |
| 6         | 2.94876599  | -1.25155663 | 1.28652072  | 6 | -3.66523409 | -0.65765667 | 0.38882074  |  |
| 1         | 3.73386598  | -0.52405667 | 1.44092071  | 6 | -4.76123381 | -0.28335667 | -0.60867923 |  |
| 1         | 1.52526617  | -0.76355666 | 2.91852069  | 1 | -3.25863385 | -1.64815664 | 0.14062074  |  |
| 1         | 0.09166616  | -2.85065651 | 1.94842076  | 1 | -5.57543373 | -1.01025665 | -0.59447926 |  |
| 1         | 3.69736600  | -2.43525672 | -0.45647928 | 1 | -4.36833382 | -0.23665665 | -1.62947929 |  |
| 6         | -0.34913382 | 0.00744335  | -2.29927921 | 1 | -5.18343401 | 0.69704336  | -0.37157926 |  |
| 6         | -0.89033377 | -1.24535656 | -1.90287924 | 6 | -0.14463383 | 0.98794335  | 1.03562069  |  |
| 6         | 0.10056616  | -2.23515654 | -2.08347917 | 6 | -1.26303387 | -0.06825665 | 1.13772070  |  |
| 6         | 1.26086617  | -1.60105658 | -2.61277938 | 6 | -1.55663383 | -0.45435664 | 2.59362078  |  |
| 6         | 0.96886611  | -0.22485664 | -2.76567936 | 1 | 0.33546615  | 1.10814345  | 2.01122069  |  |
| 1         | 1.63766623  | 0.52434331  | -3.16857934 | 1 | -0.67073381 | 1.93784332  | 0.84562075  |  |
| 1         | -0.86583376 | 0.95834333  | -2.31727934 | 1 | -0.99373376 | -1.05235660 | 0.64742076  |  |
| 1         | -1.89533389 | -1.41935658 | -1.53807926 | 1 | -2.25593400 | -1.29185665 | 2.65182066  |  |
| 1         | 2.18346620  | -2.09525657 | -2.89357924 | 1 | -2.00443387 | 0.40184331  | 3.10722065  |  |
| 40        | 0.99916613  | -0.72885668 | -0.27467927 | 1 | -0.65173388 | -0.73065668 | 3.13782072  |  |
| 6         | 2.79956603  | 0.92204338  | -0.74897921 | 1 | -2.29943395 | 0.69704336  | -0.60477924 |  |
| 1         | -4.10203409 | -0.75635666 | 1.38692069  | 1 | -2.90543389 | 1.28614342  | 0.92592078  |  |
| 13        | 1.26466620  | 2.25484347  | -0.07657926 | 1 | -0.02493384 | -3.29405665 | -1.89967930 |  |
| 6         | 0.41946617  | 3.18414330  | -1.58067930 | 1 | 1.46196616  | -3.89415669 | -0.11067926 |  |
| 6         | 2.10506606  | 3.18754339  | 1.41422069  | 1 | 3.23006606  | 0.05444334  | -1.26507926 |  |
| 1         | -0.67233384 | 3.24864340  | -1.48887932 | 1 | 3.52276611  | 1.17984343  | 0.02932074  |  |
| 1         | 0.62906617  | 2.75924349  | -2.56927919 | 1 | 2.88266611  | 1.69594336  | -1.52997935 |  |
| 1         | 0.77526617  | 4.22074318  | -1.61427927 |   |             |             |             |  |

## TS-4Me

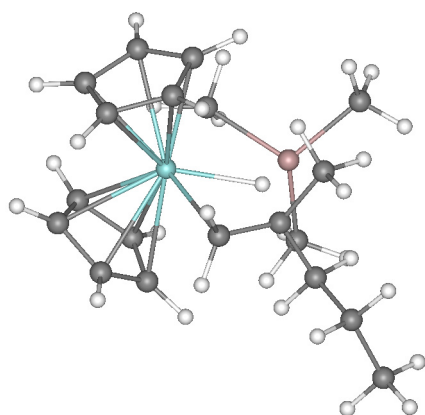

|                                              |                             |
|----------------------------------------------|-----------------------------|
| Zero-point vibrational energy                | 1201249.4 (Joules/Mol)      |
|                                              | 287.10549 (Kcal/Mol)        |
| Zero-point correction=                       | 0.457532 (Hartree/Particle) |
| Thermal correction to Energy=                | 0.483782                    |
| Thermal correction to Enthalpy=              | 0.484726                    |
| Thermal correction to Gibbs Free Energy=     | 0.403324                    |
| Sum of electronic and zero-point Energies=   | -4525.515384                |
| Sum of electronic and thermal Energies=      | -4525.489134                |
| Sum of electronic and thermal Enthalpies=    | -4525.488190                |
| Sum of electronic and thermal Free Energies= | -4525.569592                |

| cartesian |            |             |             |    |             |                         |
|-----------|------------|-------------|-------------|----|-------------|-------------------------|
| 6         | 2.24909449 | 1.15650380  | 1.92583585  | 1  | -1.93640554 | -0.16109625 3.01843596  |
| 6         | 3.33119440 | 1.14360380  | 0.99923581  | 1  | -0.33690554 | 0.51560372 0.18973584   |
| 6         | 3.84129429 | -0.16699624 | 0.93233585  | 1  | -2.70150566 | 0.34430376 -0.10066415  |
| 6         | 3.07809448 | -0.98299628 | 1.81463587  | 1  | -2.05660534 | -1.16969621 -0.74026418 |
| 6         | 2.12889433 | -0.14939624 | 2.45473599  | 1  | 0.19129446  | -1.86269617 2.15253592  |
| 1         | 1.43989444 | -0.46299624 | 3.22663593  | 1  | -0.48270553 | -2.48259640 0.57113582  |
| 1         | 1.67099452 | 2.02680373  | 2.21433592  | 13 | -0.45960552 | 1.96280372 -0.93646419  |
| 1         | 3.71229458 | 1.99740374  | 0.45573583  | 6  | 1.56749451  | 2.11490369 -1.21106410  |
| 1         | 4.67819452 | -0.48929623 | 0.32603583  | 6  | -1.46570551 | 1.35080385 -2.50176406  |
| 1         | 3.23599434 | -2.03679633 | 2.01023579  | 6  | -1.04970551 | 3.37360358 0.27703583   |
| 6         | 2.73649454 | -0.88939625 | -2.11686420 | 1  | -2.11950541 | 3.31690359 0.50683582   |
| 6         | 2.77659464 | -2.05529618 | -1.30436409 | 1  | -0.50790548 | 3.38330364 1.22973585   |
| 6         | 1.46289444 | -2.55089641 | -1.18276405 | 1  | -0.89280558 | 4.35820389 -0.18066417  |
| 6         | 0.60209447 | -1.70329618 | -1.93976414 | 1  | -2.53070545 | 1.59120381 -2.40796399  |
| 6         | 1.39329445 | -0.69599628 | -2.53206420 | 1  | -1.12150550 | 1.85730386 -3.41296411  |
| 1         | 1.03209448 | 0.09690376  | -3.17606401 | 1  | -1.40330553 | 0.27570376 -2.70306420  |
| 1         | 3.59099436 | -0.29299623 | -2.41366410 | 1  | 1.26069450  | 2.57320356 -2.17156410  |
| 1         | 3.66089439 | -2.49469638 | -0.86086416 | 1  | 1.83859444  | 2.94340372 -0.54926413  |

|    |             |             |             |   |             |             |             |
|----|-------------|-------------|-------------|---|-------------|-------------|-------------|
| 1  | 1.17479444  | -3.44059634 | -0.63886416 | 1 | 2.49999452  | 1.63650382  | -1.51556408 |
| 1  | -0.46280551 | -1.83849621 | -2.08126402 | 6 | -3.46680546 | -1.41899621 | 0.87783581  |
| 40 | 1.49989450  | -0.29679623 | -0.01916416 | 6 | -4.64610529 | -1.62739623 | -0.07156416 |
| 6  | -2.33080530 | -0.64809626 | 0.18193583  | 1 | -3.80130529 | -0.86369628 | 1.75903594  |
| 6  | -1.12540555 | -0.52999622 | 1.09763587  | 1 | -3.09070539 | -2.38489628 | 1.23103595  |
| 6  | -0.23230553 | -1.62129617 | 1.18323588  | 1 | -5.45990562 | -2.15399623 | 0.43033585  |
| 6  | -1.32830548 | 0.38430378  | 2.28883600  | 1 | -4.35100555 | -2.21739626 | -0.94356418 |
| 1  | -0.39450550 | 0.66130376  | 2.77623582  | 1 | -5.03610563 | -0.67049628 | -0.42886415 |
| 1  | -1.86310542 | 1.29470384  | 2.00963593  |   |             |             |             |

## I-5Me

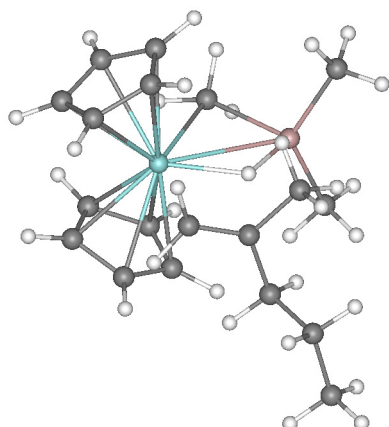

|                                             |                             |
|---------------------------------------------|-----------------------------|
| Zero-point vibrational energy               | 1201249.4 (Joules/Mol)      |
|                                             | 287.10549 (Kcal/Mol)        |
| Zero-point correction                       | 0.457532 (Hartree/Particle) |
| Thermal correction to Energy                | 0.483782                    |
| Thermal correction to Enthalpy              | 0.484726                    |
| Thermal correction to Gibbs Free Energy     | 0.403324                    |
| Sum of electronic and zero-point Energies   | -4525.515384                |
| Sum of electronic and thermal Energies      | -4525.489134                |
| Sum of electronic and thermal Enthalpies    | -4525.488190                |
| Sum of electronic and thermal Free Energies | -4525.569592                |

| cartesian |             |             |             |   |             |             |             |
|-----------|-------------|-------------|-------------|---|-------------|-------------|-------------|
| 6         | 0.30487162  | -2.28994155 | -1.48408866 | 1 | 0.85947156  | 3.17795849  | 1.83051133  |
| 6         | 1.69587159  | -2.51814151 | -1.53198874 | 1 | 0.95997161  | 4.47655869  | 0.64471132  |
| 6         | 2.29237151  | -1.43084145 | -2.23328876 | 1 | -0.80872840 | 3.47915840  | -2.54448867 |
| 6         | 1.25467157  | -0.55114150 | -2.63038874 | 1 | -0.74502844 | 1.75395846  | -2.87728858 |
| 6         | 0.02807161  | -1.05854154 | -2.13998866 | 1 | -1.97892833 | 2.41205835  | -1.80658865 |
| 1         | -0.94792837 | -0.61384153 | -2.29038858 | 6 | -0.63732845 | -1.68244147 | 1.56531131  |
| 1         | -0.42592841 | -2.96174169 | -1.05588865 | 6 | -1.52532840 | -0.69794154 | 1.27081132  |
| 1         | 2.20957160  | -3.38444161 | -1.13458872 | 6 | -1.69662833 | 0.48975846  | 2.17971134  |

---

|    |             |             |             |   |             |             |             |
|----|-------------|-------------|-------------|---|-------------|-------------|-------------|
| 1  | 3.34557176  | -1.32624149 | -2.46698880 | 6 | -2.50172830 | -0.80874157 | 0.13281132  |
| 1  | 1.37557161  | 0.36315849  | -3.19708872 | 1 | -0.66652840 | -2.63564157 | 1.04611135  |
| 6  | 2.15797162  | -0.37384152 | 2.32601142  | 1 | -0.11172837 | -1.66414154 | 2.51421142  |
| 6  | 2.49117160  | -1.66884148 | 1.82541132  | 1 | -1.96742845 | 1.39005852  | 1.62031126  |
| 6  | 3.52667165  | -1.50834155 | 0.87421131  | 1 | -2.51522827 | 0.28115848  | 2.87751126  |
| 6  | 3.79007173  | -0.12674153 | 0.73841131  | 1 | -0.79952842 | 0.69545853  | 2.76711130  |
| 6  | 2.95227170  | 0.57245851  | 1.65541136  | 6 | -3.94942856 | -0.94394147 | 0.64341134  |
| 1  | 2.93167162  | 1.64295852  | 1.81531131  | 1 | -2.43412828 | 0.09035848  | -0.49508870 |
| 1  | 1.43597162  | -0.15004152 | 3.10101128  | 1 | -2.26522827 | -1.67624152 | -0.49258870 |
| 1  | 2.08087158  | -2.61364150 | 2.16051126  | 1 | 1.95887160  | 2.37875843  | -1.94058871 |
| 1  | 4.02497149  | -2.30414152 | 0.33541131  | 1 | 2.99087167  | 1.12015855  | -1.49088871 |
| 1  | 4.53597164  | 0.31785849  | 0.09161133  | 1 | 2.77777171  | 2.44255829  | -0.37728870 |
| 40 | 1.42487168  | -0.46704152 | -0.10498868 | 6 | -4.92972851 | -1.13254154 | -0.51248866 |
| 6  | 2.23337150  | 1.77715850  | -1.05478871 | 1 | -4.22352839 | -0.05194152 | 1.21451128  |
| 1  | -0.05562842 | 0.76265848  | 0.15231133  | 1 | -4.00862837 | -1.79464149 | 1.33041131  |
| 13 | 0.24547160  | 2.30535841  | -0.52528870 | 1 | -5.95242834 | -1.22724152 | -0.14268868 |
| 6  | 0.37977159  | 3.59305835  | 0.93611133  | 1 | -4.69602823 | -2.03454161 | -1.08478868 |
| 6  | -0.92052835 | 2.49005842  | -2.08458877 | 1 | -4.89842844 | -0.27994153 | -1.19678867 |
| 1  | -0.60292834 | 3.96475816  | 1.24671125  |   |             |             |             |

---

### S3.6. <sup>i</sup>Bu<sub>2</sub>AlH reaction profile

I-OH

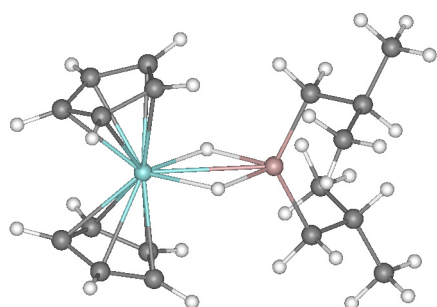

|                                             |                             |
|---------------------------------------------|-----------------------------|
| Zero-point vibrational energy               | 1134721.8 (Joules/Mol)      |
|                                             | 271.20502 (Kcal/Mol)        |
| Zero-point correction                       | 0.432193 (Hartree/Particle) |
| Thermal correction to Energy                | 0.456539                    |
| Thermal correction to Enthalpy              | 0.457484                    |
| Thermal correction to Gibbs Free Energy     | 0.373872                    |
| Sum of electronic and zero-point Energies   | -4486.266924                |
| Sum of electronic and thermal Energies      | -4486.242577                |
| Sum of electronic and thermal Enthalpies    | -4486.241633                |
| Sum of electronic and thermal Free Energies | -4486.325245                |

|   |             |             |             | cartesian |            |             |             |
|---|-------------|-------------|-------------|-----------|------------|-------------|-------------|
| 6 | -3.42163610 | 1.52515006  | 1.65658605  | 6         | 1.56366396 | -1.64485002 | -0.57961398 |
| 6 | -4.19173622 | 1.57825005  | 0.46678603  | 1         | 2.01516390 | 1.50534999  | 1.59268606  |
| 6 | -3.38523602 | 2.14665008  | -0.55361396 | 6         | 2.63566399 | 2.12145019  | -0.39971399 |
| 6 | -2.12053609 | 2.46795011  | 0.01268600  | 1         | 0.82786393 | 2.46835017  | 0.73948604  |
| 6 | -2.14083600 | 2.08075023  | 1.37868607  | 6         | 2.65516400 | -2.11554980 | 0.40668601  |
| 1 | -1.33253598 | 2.20485020  | 2.08898592  | 1         | 0.83746397 | -2.46024990 | -0.71701401 |
| 1 | -3.76123595 | 1.15495002  | 2.61738586  | 1         | 2.00936389 | -1.47885001 | -1.57081401 |
| 1 | -5.22033596 | 1.25744998  | 0.36018598  | 6         | 3.32476401 | 3.40105009  | 0.08018599  |
| 1 | -3.69143605 | 2.33525014  | -1.57631397 | 6         | 2.02676392 | 2.33135009  | -1.78921402 |
| 1 | -1.29273605 | 2.93685007  | -0.50481397 | 1         | 3.39986396 | 1.33685005  | -0.48091400 |
| 6 | -4.17973614 | -1.59614992 | -0.48251402 | 6         | 3.33596396 | -3.39364982 | -0.08861400 |
| 6 | -3.39493608 | -1.47025001 | -1.65911400 | 6         | 2.06616402 | -2.33034992 | 1.80408597  |
| 6 | -2.11723614 | -2.03914976 | -1.39881396 | 1         | 3.42106414 | -1.33194995 | 0.47988600  |
| 6 | -2.10863590 | -2.49894977 | -0.05541400 | 1         | 4.13176441 | -3.71154976 | 0.59128600  |
| 6 | -3.38363600 | -2.21944976 | 0.51158601  | 1         | 3.77446389 | -3.24894977 | -1.07951403 |
| 1 | -3.70063615 | -2.46644974 | 1.51858604  | 1         | 2.60736394 | -4.20924997 | -0.15901400 |
| 1 | -5.21123600 | -1.28684998 | -0.36951399 | 1         | 4.11016369 | 3.71585011  | -0.61321402 |
| 1 | -3.72553611 | -1.04855001 | -2.60151410 | 1         | 3.77836394 | 3.25945020  | 1.06478596  |
| 1 | -1.29963613 | -2.12004995 | -2.10451412 | 1         | 2.59776402 | 4.21725035  | 0.15898600  |
| 1 | -1.28463602 | -2.99284983 | 0.44478601  | 1         | 2.76966405 | 2.69105005  | -2.50621414 |

|    |             |             |             |   |            |             |             |
|----|-------------|-------------|-------------|---|------------|-------------|-------------|
| 40 | -2.31443596 | -0.01794996 | 0.04678600  | 1 | 1.22226393 | 3.07625008  | -1.74611402 |
| 1  | -0.70073605 | -0.34654996 | 1.09818602  | 1 | 1.60496402 | 1.40455008  | -2.20351410 |
| 1  | -0.72603607 | 0.32815003  | -1.01891398 | 1 | 2.81736398 | -2.69884992 | 2.50778580  |
| 13 | 0.70166397  | -0.00144996 | 0.02798600  | 1 | 1.25566399 | -3.06924987 | 1.76898599  |
| 6  | 1.55806398  | 1.65614998  | 0.60418600  | 1 | 1.65686393 | -1.40324998 | 2.23028588  |

## I-OH\_bo

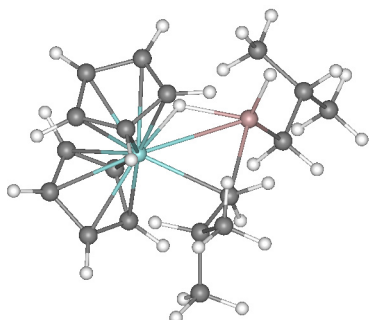

|                                             |                             |
|---------------------------------------------|-----------------------------|
| Zero-point vibrational energy               | 1138711.1 (Joules/Mol)      |
|                                             | 272.15848 (Kcal/Mol)        |
| Zero-point correction                       | 0.433712 (Hartree/Particle) |
| Thermal correction to Energy                | 0.457216                    |
| Thermal correction to Enthalpy              | 0.458160                    |
| Thermal correction to Gibbs Free Energy     | 0.381281                    |
| Sum of electronic and zero-point Energies   | -4486.265712                |
| Sum of electronic and thermal Energies      | -4486.242208                |
| Sum of electronic and thermal Enthalpies    | -4486.241264                |
| Sum of electronic and thermal Free Energies | -4486.318143                |

## cartesian

|   |             |             |             |    |            |             |             |
|---|-------------|-------------|-------------|----|------------|-------------|-------------|
| 6 | -1.97790194 | -0.45687792 | -2.45889997 | 1  | 0.41819799 | 1.82142198  | -0.71950006 |
| 6 | -2.36900187 | -1.74417794 | -2.01889992 | 13 | 1.30609798 | 0.27172208  | 1.02049994  |
| 6 | -1.19210196 | -2.47617793 | -1.70300007 | 1  | 1.19829798 | 0.27852207  | 2.59529996  |
| 6 | -0.07340199 | -1.64467788 | -1.96970010 | 6  | 2.90639782 | 0.55772209  | -0.05730003 |
| 6 | -0.55660200 | -0.38967791 | -2.41799998 | 6  | 4.13219786 | -0.19927791 | 0.49449998  |
| 1 | 0.05639800  | 0.44882208  | -2.72449994 | 1  | 2.72229815 | 0.23362209  | -1.09460008 |
| 1 | -2.64690208 | 0.32812208  | -2.79250002 | 1  | 3.13419819 | 1.63102210  | -0.12110004 |
| 1 | -3.38490200 | -2.11357784 | -1.95940006 | 6  | 5.36079788 | 0.00892209  | -0.39370003 |
| 1 | -1.15020204 | -3.50357795 | -1.36380005 | 6  | 3.82539797 | -1.69227791 | 0.64399993  |
| 1 | 0.96659803  | -1.92247796 | -1.85520005 | 1  | 4.36229801 | 0.19882210  | 1.49099994  |
| 6 | -3.34920216 | -1.56407785 | 1.09549999  | 1  | 6.24329805 | -0.48397791 | 0.02439997  |
| 6 | -2.26350212 | -2.43537807 | 1.39629996  | 1  | 5.58929777 | 1.07212210  | -0.50770009 |
| 6 | -1.35010195 | -1.73037791 | 2.21670008  | 1  | 5.18429804 | -0.40657791 | -1.39220011 |
| 6 | -1.85020196 | -0.41297793 | 2.40400004  | 1  | 4.69749784 | -2.25147796 | 0.99409997  |
| 6 | -3.09980202 | -0.32517791 | 1.73219991  | 1  | 3.52249813 | -2.12077785 | -0.31960005 |

|    |             |             |             |   |             |             |             |
|----|-------------|-------------|-------------|---|-------------|-------------|-------------|
| 1  | -3.75660181 | 0.53662211  | 1.71409988  | 1 | 3.01759815  | -1.87797785 | 1.36669993  |
| 1  | -4.23260212 | -1.81667793 | 0.52269995  | 6 | -2.23670197 | 2.84602189  | 1.03469992  |
| 1  | -2.17250204 | -3.46857810 | 1.08589995  | 1 | -2.39850187 | 1.21772206  | -0.31280002 |
| 1  | -0.43360201 | -2.12287807 | 2.63779998  | 6 | -1.74220204 | 2.87582207  | -1.43660009 |
| 1  | -1.38120198 | 0.35292208  | 3.00920010  | 1 | -3.29870176 | 3.05372190  | 0.87940001  |
| 40 | -1.32710195 | -0.62057793 | -0.03880003 | 1 | -1.71610200 | 3.80462217  | 1.11459994  |
| 6  | -0.21890199 | 1.56532204  | 0.13299996  | 1 | -2.11630201 | 2.32242203  | 1.98529994  |
| 1  | 0.44219798  | -1.14207792 | 0.48499995  | 1 | -2.77960205 | 3.14052200  | -1.65860009 |
| 1  | 0.13989800  | 2.15762186  | 0.99210000  | 1 | -1.32950199 | 2.33782196  | -2.29340005 |
| 6  | -1.64920199 | 2.05882192  | -0.14190003 | 1 | -1.17260194 | 3.80152178  | -1.31730008 |

## I-1H

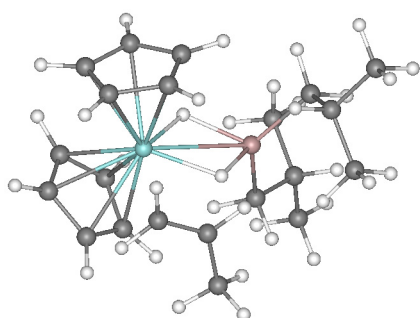

|                                             |                             |
|---------------------------------------------|-----------------------------|
| Zero-point vibrational energy               | 1356959.8 (Joules/Mol)      |
|                                             | 324.32118 (Kcal/Mol)        |
| Zero-point correction                       | 0.516839 (Hartree/Particle) |
| Thermal correction to Energy                | 0.545555                    |
| Thermal correction to Enthalpy              | 0.546499                    |
| Thermal correction to Gibbs Free Energy     | 0.457341                    |
| Sum of electronic and zero-point Energies   | -4604.058621                |
| Sum of electronic and thermal Energies      | -4604.029905                |
| Sum of electronic and thermal Enthalpies    | -4604.028960                |
| Sum of electronic and thermal Free Energies | -4604.118119                |

## cartesian

|   |             |             |             |    |             |             |             |
|---|-------------|-------------|-------------|----|-------------|-------------|-------------|
| 6 | -2.65861034 | -2.27949309 | -1.15430343 | 1  | -1.47221017 | -0.96759319 | -3.49750352 |
| 6 | -3.45611024 | -2.30199313 | 0.01249658  | 1  | -1.08941019 | 1.79580677  | -2.11910343 |
| 6 | -2.60261035 | -2.60389328 | 1.11369658  | 13 | 1.09728980  | -0.07769318 | 0.39239657  |
| 6 | -1.28681016 | -2.76279330 | 0.61819655  | 6  | 2.11408973  | -1.61049318 | -0.27930343 |
| 6 | -1.31081021 | -2.52939320 | -0.78490341 | 6  | 1.79778981  | 1.65520680  | 0.98199660  |
| 1 | -0.46201020 | -2.59639311 | -1.45540345 | 1  | 2.23378968  | -1.52379322 | -1.37040341 |
| 1 | -3.02061033 | -2.12679315 | -2.16210341 | 6  | 3.50418997  | -1.71139324 | 0.38369656  |
| 1 | -4.52941036 | -2.16099310 | 0.05559658  | 1  | 1.58298969  | -2.56079316 | -0.11810343 |
| 1 | -2.90961027 | -2.72909307 | 2.14439654  | 6  | 1.35778975  | 2.80770683  | 0.05409658  |
| 1 | -0.41591018 | -3.02469325 | 1.20469654  | 1  | 1.52228975  | 1.87780678  | 2.02229667  |

|    |             |             |             |   |            |             |             |
|----|-------------|-------------|-------------|---|------------|-------------|-------------|
| 6  | -2.66781020 | 1.99760675  | 0.90239662  | 1 | 2.89738965 | 1.61190677  | 0.98369658  |
| 6  | -3.81021023 | 1.14790678  | 1.00709653  | 6 | 4.29988956 | -2.89659309 | -0.16820343 |
| 6  | -3.59481025 | 0.27150682  | 2.09809661  | 6 | 3.36448979 | -1.82219315 | 1.90479648  |
| 6  | -2.31231022 | 0.53610682  | 2.63329649  | 1 | 4.06448984 | -0.79389322 | 0.15979658  |
| 6  | -1.74871016 | 1.62240684  | 1.90039659  | 6 | 1.83868980 | 2.55570674  | -1.37890351 |
| 1  | -0.77971017 | 2.07340670  | 2.07719660  | 6 | 1.86488986 | 4.16250706  | 0.55519658  |
| 1  | -2.52541018 | 2.79990673  | 0.18779658  | 1 | 0.25608981 | 2.84800673  | 0.03499658  |
| 1  | -4.71191025 | 1.20160675  | 0.40939659  | 1 | 1.52698970 | 3.35470676  | -2.05880356 |
| 1  | -4.29000998 | -0.47889319 | 2.45279646  | 1 | 1.45518970 | 1.60770679  | -1.78560352 |
| 1  | -1.85101008 | 0.03260682  | 3.47349644  | 1 | 2.93238974 | 2.50040674  | -1.41030347 |
| 40 | -1.92521024 | -0.34659317 | 0.31619656  | 1 | 5.29738998 | -2.95139313 | 0.27779657  |
| 1  | -0.30151021 | -0.59039319 | 1.35029650  | 1 | 4.41798973 | -2.82249308 | -1.25290346 |
| 1  | -0.29471019 | 0.26200682  | -0.60650343 | 1 | 3.78148985 | -3.83679318 | 0.05069657  |
| 6  | -2.94131017 | 0.80590683  | -2.08550358 | 1 | 4.33668995 | -1.92679322 | 2.39409661  |
| 6  | -1.63331008 | 0.89820683  | -2.41560340 | 1 | 2.76338983 | -2.70019317 | 2.17099643  |
| 6  | -0.90421021 | -0.05309319 | -3.31700349 | 1 | 2.88148975 | -0.93629318 | 2.34149647  |
| 1  | -3.56571031 | 0.00370681  | -2.46910357 | 1 | 1.53698969 | 4.98090696  | -0.09310342 |
| 1  | -3.45351028 | 1.64150679  | -1.62220347 | 1 | 2.95958972 | 4.16960716  | 0.57969660  |
| 1  | -0.75211018 | 0.44230682  | -4.28200340 | 1 | 1.50778985 | 4.36690712  | 1.56869650  |
| 1  | 0.08408982  | -0.30869317 | -2.92710352 |   |            |             |             |

## TS-1H

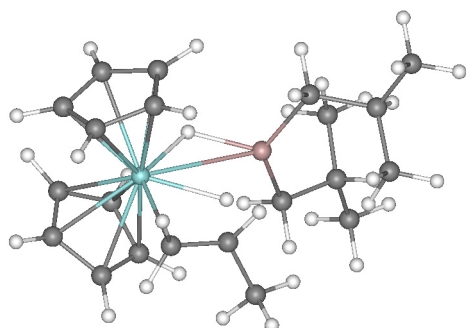

|                                             |                             |
|---------------------------------------------|-----------------------------|
| Zero-point vibrational energy               | 1353632.3 (Joules/Mol)      |
|                                             | 323.52589 (Kcal/Mol)        |
| Zero-point correction                       | 0.515571 (Hartree/Particle) |
| Thermal correction to Energy                | 0.543544                    |
| Thermal correction to Enthalpy              | 0.544488                    |
| Thermal correction to Gibbs Free Energy     | 0.457231                    |
| Sum of electronic and zero-point Energies   | -4604.050627                |
| Sum of electronic and thermal Energies      | -4604.022655                |
| Sum of electronic and thermal Enthalpies    | -4604.021711                |
| Sum of electronic and thermal Free Energies | -4604.108967                |

cartesian

---

|    |             |             |             |    |             |             |             |
|----|-------------|-------------|-------------|----|-------------|-------------|-------------|
| 6  | 1.85980844  | 2.42909479  | -0.42229149 | 1  | 2.99940825  | -1.74520516 | -2.08349156 |
| 6  | 2.10580850  | 2.40209484  | 0.98080844  | 1  | 0.74140847  | 0.26479489  | 1.31520855  |
| 6  | 3.44800854  | 2.01589489  | 1.18260849  | 13 | -0.74729156 | 0.05779488  | 0.49130848  |
| 6  | 4.04690838  | 1.80889487  | -0.09469152 | 6  | -1.62359154 | 1.76719487  | 0.11920848  |
| 6  | 3.07110834  | 2.09699488  | -1.07889152 | 6  | -1.48909152 | -1.73240519 | 0.76380849  |
| 1  | 3.23280859  | 2.09039474  | -2.14829159 | 1  | -1.54469144 | 2.01629496  | -0.94999152 |
| 1  | 0.93100846  | 2.72409487  | -0.89739150 | 6  | -3.10429144 | 1.80619490  | 0.55370849  |
| 1  | 1.39010847  | 2.64289474  | 1.75620854  | 1  | -1.08359158 | 2.57119489  | 0.64480847  |
| 1  | 3.93960857  | 1.91029489  | 2.14170861  | 6  | -2.86919165 | -1.94430518 | 0.11010848  |
| 1  | 5.07890844  | 1.53749490  | -0.28179151 | 1  | -0.78939152 | -2.48340511 | 0.35960847  |
| 6  | 2.93800831  | -1.12210512 | 2.32390857  | 1  | -1.55219162 | -1.94800520 | 1.84110856  |
| 6  | 4.12310839  | -1.10220516 | 1.54270852  | 6  | -3.72559166 | 3.17609477  | 0.26890847  |
| 6  | 3.91900826  | -1.92130518 | 0.40960848  | 6  | -3.24279165 | 1.45539486  | 2.03810835  |
| 6  | 2.60990858  | -2.48030519 | 0.50550848  | 1  | -3.65879154 | 1.05789483  | -0.02849152 |
| 6  | 2.01740837  | -2.00310516 | 1.69340849  | 6  | -3.36779165 | -3.37710524 | 0.31500849  |
| 1  | 1.02880847  | -2.25440526 | 2.05740857  | 6  | -2.81709146 | -1.60360515 | -1.38239145 |
| 1  | 2.77740860  | -0.60060507 | 3.25920844  | 1  | -3.58879137 | -1.26640511 | 0.58780849  |
| 1  | 5.02700853  | -0.55150509 | 1.77110851  | 1  | -4.36159134 | -3.51980519 | -0.11909152 |
| 1  | 4.64650822  | -2.11800504 | -0.36779150 | 1  | -3.42369127 | -3.62620521 | 1.37810850  |
| 1  | 2.16030836  | -3.17720509 | -0.19249150 | 1  | -2.68569136 | -4.08970499 | -0.16229150 |
| 40 | 2.32710838  | 0.01739488  | 0.18270847  | 1  | -4.78189135 | 3.19979477  | 0.55210847  |
| 1  | 0.59670842  | -1.64520514 | -2.07489157 | 1  | -3.65389156 | 3.43089485  | -0.79199153 |
| 6  | 1.13770843  | -0.70910507 | -2.21849155 | 1  | -3.20669174 | 3.95469475  | 0.83890843  |
| 6  | 2.53780842  | -0.76890510 | -2.17279148 | 1  | -4.28509140 | 1.49629486  | 2.36570859  |
| 6  | 0.42150843  | 0.32749486  | -3.05359149 | 1  | -2.67379141 | 2.16229486  | 2.65350842  |
| 1  | 0.92580843  | 1.29519486  | -3.00759149 | 1  | -2.87799168 | 0.44269487  | 2.26160860  |
| 1  | -0.62299156 | 0.45169488  | -2.76139140 | 1  | -3.77979136 | -1.77270520 | -1.87269151 |
| 1  | 0.44500846  | -0.01480512 | -4.09269190 | 1  | -2.07349157 | -2.22980523 | -1.89279151 |
| 1  | 0.60140848  | -0.21940511 | -0.82599151 | 1  | -2.55449152 | -0.54920512 | -1.55319142 |
| 1  | 3.09980822  | -0.03340512 | -2.73809147 |    |             |             |             |

---

## I-2H\_a

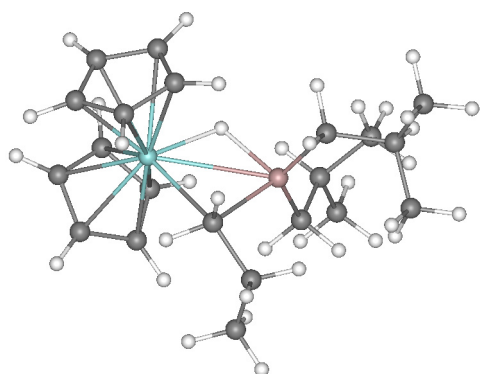

|                                             |                             |
|---------------------------------------------|-----------------------------|
| Zero-point vibrational energy               | 1365071.3 (Joules/Mol)      |
|                                             | 326.25987 (Kcal/Mol)        |
| Zero-point correction                       | 0.519928 (Hartree/Particle) |
| Thermal correction to Energy                | 0.548206                    |
| Thermal correction to Enthalpy              | 0.549150                    |
| Thermal correction to Gibbs Free Energy     | 0.461586                    |
| Sum of electronic and zero-point Energies   | -4604.069359                |
| Sum of electronic and thermal Energies      | -4604.041082                |
| Sum of electronic and thermal Enthalpies    | -4604.040138                |
| Sum of electronic and thermal Free Energies | -4604.127702                |

cartesian

|    |            |             |             |    |             |             |             |
|----|------------|-------------|-------------|----|-------------|-------------|-------------|
| 6  | 3.41094589 | 1.67184234  | 1.17716777  | 1  | -0.20835423 | 1.85004234  | -2.57713223 |
| 6  | 2.24434566 | 2.17704248  | 0.54206777  | 13 | -0.61325419 | -0.09695762 | 0.00306778  |
| 6  | 2.41054583 | 2.03294230  | -0.85603219 | 6  | -1.21695423 | 1.77244234  | -0.03773221 |
| 6  | 3.69244576 | 1.45604241  | -1.08963227 | 6  | -1.59135425 | -1.75725758 | 0.40286779  |
| 6  | 4.31324577 | 1.24714243  | 0.16516778  | 1  | -2.12775421 | 1.86504233  | -0.64923221 |
| 40 | 2.34764576 | -0.29625762 | 0.08646779  | 6  | -1.52395427 | 2.34054232  | 1.36746776  |
| 6  | 0.73014575 | -0.75995761 | -1.62403226 | 1  | -0.47755420 | 2.42444229  | -0.52353221 |
| 1  | 0.78224576 | 0.01374238  | 1.14416778  | 6  | -3.13385439 | -1.74215758 | 0.36676779  |
| 6  | 1.91674578 | -2.67765760 | 0.78896779  | 1  | -1.24845421 | -2.54205751 | -0.29313222 |
| 6  | 2.38544583 | -1.98945761 | 1.94286776  | 1  | -1.26645422 | -2.10035753 | 1.39866769  |
| 6  | 3.72594595 | -1.60065758 | 1.70546770  | 6  | -2.57315445 | 1.49714243  | 2.09586763  |
| 6  | 4.08984566 | -2.04225779 | 0.40256780  | 6  | -1.97745430 | 3.80014229  | 1.27926779  |
| 6  | 2.97264576 | -2.72195768 | -0.15123221 | 1  | -0.60535419 | 2.31014228  | 1.97226775  |
| 1  | 1.70654583 | 2.34254241  | -1.61703229 | 6  | -3.69625425 | -3.12715769 | 0.70086777  |
| 1  | 4.13124561 | 1.24644244  | -2.05903220 | 6  | -3.65695429 | -1.27325761 | -0.99233216 |
| 1  | 1.38144577 | 2.60064244  | 1.04076779  | 1  | -3.49595404 | -1.04125762 | 1.12766778  |
| 1  | 3.59584570 | 1.65744233  | 2.24446774  | 1  | -4.78995419 | -3.11945772 | 0.72006780  |
| 1  | 5.30304575 | 0.83734238  | 0.32426780  | 1  | -3.34425402 | -3.47395754 | 1.67666769  |
| 1  | 4.36794567 | -1.07225764 | 2.39906764  | 1  | -3.37875414 | -3.85875750 | -0.05103222 |
| 1  | 1.81754577 | -1.80705762 | 2.84646773  | 1  | -2.83565426 | 1.93724227  | 3.06206775  |

|   |             |             |             |   |             |             |             |
|---|-------------|-------------|-------------|---|-------------|-------------|-------------|
| 1 | 0.92694581  | -3.10145760 | 0.66506779  | 1 | -2.21995401 | 0.47594237  | 2.28936768  |
| 1 | 2.93634558  | -3.18665767 | -1.13003230 | 1 | -3.49015427 | 1.42794240  | 1.49886775  |
| 1 | 5.06094599  | -1.92825758 | -0.06343221 | 1 | -2.15195417 | 4.22554255  | 2.27196765  |
| 1 | 1.73824573  | -0.53795761 | -2.07093215 | 1 | -2.91195440 | 3.87134242  | 0.71246779  |
| 1 | 0.67284578  | -1.85175765 | -1.56103230 | 1 | -1.23125422 | 4.41874218  | 0.77096778  |
| 6 | -0.26475424 | -0.32695761 | -2.73543239 | 1 | -4.74895430 | -1.31585765 | -1.03493226 |
| 6 | -0.02775425 | 1.06444240  | -3.31363225 | 1 | -3.27145433 | -1.91375756 | -1.79573226 |
| 1 | -1.30195427 | -0.40175763 | -2.37523222 | 1 | -3.36565399 | -0.23755762 | -1.20843232 |
| 1 | -0.70515418 | 1.24334240  | -4.15133190 | 1 | -0.20395422 | -1.06785762 | -3.53873229 |
| 1 | 0.99544579  | 1.16234243  | -3.69223237 |   |             |             |             |

### I-2H\_bi

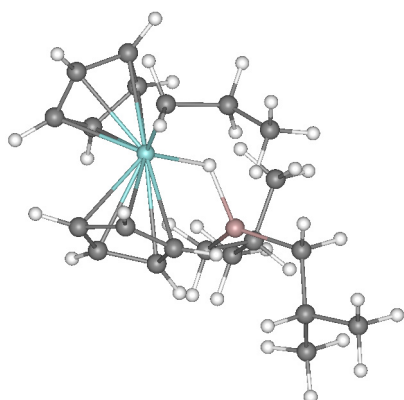

|                                             |                             |
|---------------------------------------------|-----------------------------|
| Zero-point vibrational energy               | 1362944.2 (Joules/Mol)      |
|                                             | 325.75147 (Kcal/Mol)        |
| Zero-point correction                       | 0.519118 (Hartree/Particle) |
| Thermal correction to Energy                | 0.548034                    |
| Thermal correction to Enthalpy              | 0.548978                    |
| Thermal correction to Gibbs Free Energy     | 0.456332                    |
| Sum of electronic and zero-point Energies   | -4604.057475                |
| Sum of electronic and thermal Energies      | -4604.028559                |
| Sum of electronic and thermal Enthalpies    | -4604.027615                |
| Sum of electronic and thermal Free Energies | -4604.120260                |

### cartesian

|   |             |             |             |    |             |             |             |
|---|-------------|-------------|-------------|----|-------------|-------------|-------------|
| 6 | -4.18676949 | -1.67005587 | 0.10166949  | 1  | -1.81656957 | 3.39204407  | 1.10836947  |
| 6 | -3.45776939 | -2.18865609 | -0.99433053 | 1  | -2.64466953 | 0.97214413  | 2.83156967  |
| 6 | -2.21226954 | -2.67595601 | -0.50843048 | 13 | 1.08293045  | -0.29475588 | 0.02226950  |
| 6 | -2.19206953 | -2.48385596 | 0.89676952  | 6  | 1.78163040  | 1.41334414  | 0.65376949  |
| 6 | -3.39606953 | -1.84215581 | 1.27026951  | 6  | 1.90723050  | -1.88895583 | -0.73743051 |
| 1 | -3.67626953 | -1.55015588 | 2.27516937  | 1  | 2.47323036  | 1.21364415  | 1.48766947  |
| 1 | -5.17426920 | -1.22975588 | 0.05746950  | 6  | 2.53573036  | 2.26214409  | -0.39493051 |
| 1 | -3.79796934 | -2.22945595 | -2.02143049 | 1  | 0.96493053  | 2.00244403  | 1.09726954  |

|    |             |             |             |   |            |             |             |
|----|-------------|-------------|-------------|---|------------|-------------|-------------|
| 1  | -1.43806958 | -3.15285587 | -1.09693050 | 6 | 2.99843025 | -2.40985608 | 0.22536948  |
| 1  | -1.38786960 | -2.76715589 | 1.56416953  | 1 | 1.15583050 | -2.67985606 | -0.88113052 |
| 6  | -1.06056952 | 1.79844415  | -1.42873049 | 1 | 2.34293032 | -1.70035589 | -1.72773051 |
| 6  | -2.40056944 | 1.73654413  | -1.86003053 | 6 | 3.73373079 | 1.49604416  | -0.96373051 |
| 6  | -2.58266973 | 0.51894414  | -2.57323027 | 6 | 2.99203062 | 3.59234405  | 0.20996949  |
| 6  | -1.34016955 | -0.15915588 | -2.61763048 | 1 | 1.85573041 | 2.49464393  | -1.22793055 |
| 6  | -0.39546952 | 0.62694412  | -1.91023052 | 6 | 3.63043070 | -3.70265603 | -0.29423052 |
| 1  | 0.68463051  | 0.50944412  | -2.01743054 | 6 | 2.41543055 | -2.62265587 | 1.62636948  |
| 1  | -0.59136951 | 2.61224413  | -0.88673049 | 1 | 3.78943062 | -1.65105581 | 0.29776949  |
| 1  | -3.15776968 | 2.49004412  | -1.69703054 | 1 | 4.42273045 | -4.05455589 | 0.37266952  |
| 1  | -3.50156975 | 0.19634412  | -3.04723072 | 1 | 4.06333065 | -3.55775595 | -1.28753054 |
| 1  | -1.13386953 | -1.09265590 | -3.12713051 | 1 | 2.87483025 | -4.49255610 | -0.36743051 |
| 40 | -2.17176962 | -0.20305587 | -0.20443051 | 1 | 4.28863049 | 2.10384393  | -1.68323052 |
| 1  | -0.42496952 | -0.59725589 | 0.66176951  | 1 | 3.43713045 | 0.57224417  | -1.47713053 |
| 1  | -1.46666956 | 0.93684411  | 1.56916952  | 1 | 4.42413044 | 1.21864414  | -0.15893051 |
| 6  | -3.56516933 | 1.22354412  | 0.87956953  | 1 | 3.50033045 | 4.21304417  | -0.53353047 |
| 6  | -2.43686962 | 1.45004416  | 1.87086952  | 1 | 3.68983078 | 3.41334391  | 1.03496945  |
| 6  | -2.03776956 | 2.91644406  | 2.06826973  | 1 | 2.14473057 | 4.16084385  | 0.60506952  |
| 1  | -4.44576931 | 0.77734417  | 1.33676946  | 1 | 3.16053057 | -3.01485586 | 2.32336950  |
| 1  | -3.85056973 | 2.14524412  | 0.37536949  | 1 | 1.58323038 | -3.33605599 | 1.59156954  |
| 1  | -1.16196954 | 3.01454401  | 2.71396971  | 1 | 2.03863049 | -1.68705583 | 2.07116938  |
| 1  | -2.86616945 | 3.46144414  | 2.52536964  |   |            |             |             |

## I-2H\_bo

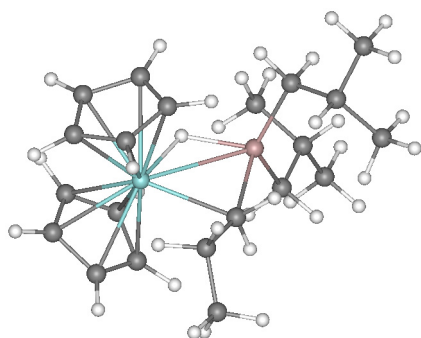

|                                             |                             |
|---------------------------------------------|-----------------------------|
| Zero-point vibrational energy               | 1367094.0 (Joules/Mol)      |
|                                             | 326.74332 (Kcal/Mol)        |
| Zero-point correction                       | 0.520699 (Hartree/Particle) |
| Thermal correction to Energy                | 0.548879                    |
| Thermal correction to Enthalpy              | 0.549823                    |
| Thermal correction to Gibbs Free Energy     | 0.461991                    |
| Sum of electronic and zero-point Energies   | -4604.080319                |
| Sum of electronic and thermal Energies      | -4604.052139                |
| Sum of electronic and thermal Enthalpies    | -4604.051195                |
| Sum of electronic and thermal Free Energies | -4604.139027                |

cartesian

---

|    |             |             |             |    |             |             |             |
|----|-------------|-------------|-------------|----|-------------|-------------|-------------|
| 6  | 1.61622548  | -2.28887296 | 1.10839832  | 1  | 4.81002569  | -1.30877292 | 1.28319836  |
| 6  | 2.94332528  | -2.31967306 | 0.60099828  | 1  | 2.79842544  | -0.96687287 | -3.98620200 |
| 6  | 3.74712539  | -1.47647297 | 1.40399837  | 13 | -0.91267461 | 0.13922711  | 0.21269830  |
| 6  | 2.92162538  | -0.93847287 | 2.43189812  | 6  | -1.82037473 | -1.42397296 | 0.98109829  |
| 6  | 1.61412549  | -1.45427299 | 2.25999832  | 6  | -1.78547478 | 1.77192700  | -0.41950169 |
| 1  | 0.76402539  | -1.25097299 | 2.89809823  | 1  | -2.71377468 | -1.05357289 | 1.50879836  |
| 1  | 0.76802540  | -2.84287286 | 0.72189832  | 6  | -2.28897476 | -2.47207284 | -0.05280171 |
| 1  | 3.28632522  | -2.89457297 | -0.25090170 | 1  | -1.22227454 | -1.92127299 | 1.75719833  |
| 1  | 3.24562526  | -0.28527290 | 3.23229814  | 6  | -2.88587475 | 2.24932694  | 0.55049831  |
| 6  | 2.13332534  | 2.25042701  | -0.88960171 | 1  | -1.05387473 | 2.58582711  | -0.55200171 |
| 6  | 3.42402530  | 1.67882705  | -1.06530166 | 1  | -2.22387457 | 1.60812700  | -1.41480172 |
| 6  | 4.04372549  | 1.58942699  | 0.20489830  | 6  | -3.19637465 | -1.83307290 | -1.10960174 |
| 6  | 3.14082527  | 2.11592698  | 1.16959834  | 6  | -3.00937462 | -3.63967299 | 0.62689829  |
| 6  | 1.96952534  | 2.53822708  | 0.49009830  | 1  | -1.40707469 | -2.88757300 | -0.56720173 |
| 1  | 1.10372543  | 3.00322700  | 0.94419825  | 6  | -3.56807446 | 3.52252698  | 0.04469829  |
| 1  | 1.41882539  | 2.47412705  | -1.67250168 | 6  | -2.31087470 | 2.47292709  | 1.95249832  |
| 1  | 3.86832523  | 1.38222706  | -2.00880170 | 1  | -3.64957452 | 1.46272707  | 0.62059832  |
| 1  | 3.33002543  | 2.22012711  | 2.23059821  | 1  | -4.36967468 | 3.84202695  | 0.71739829  |
| 40 | 2.08302546  | 0.03272711  | 0.29049829  | 1  | -3.99977469 | 3.37042713  | -0.94830167 |
| 1  | 0.47622538  | 0.56562710  | 1.18199837  | 1  | -2.84187460 | 4.34012747  | -0.02620171 |
| 6  | 1.89132547  | -0.54267287 | -3.55040169 | 1  | -3.55757451 | -2.57207298 | -1.83010173 |
| 6  | 0.43942538  | -0.43237290 | -1.44040167 | 1  | -2.69157457 | -1.04167295 | -1.68050170 |
| 6  | 1.67982531  | -1.03167295 | -2.11510181 | 1  | -4.07087421 | -1.37807298 | -0.63100171 |
| 1  | 1.64412546  | -2.12227297 | -2.07500172 | 1  | -3.31587458 | -4.39817286 | -0.09960170 |
| 1  | -0.34177464 | -1.20387292 | -1.51610172 | 1  | -3.90777469 | -3.28057289 | 1.13989830  |
| 1  | 0.10992539  | 0.42882711  | -2.03080177 | 1  | -2.36847472 | -4.12017250 | 1.37199831  |
| 1  | 2.66712523  | -0.80097288 | -1.61020172 | 1  | -3.07137465 | 2.83382702  | 2.65029812  |
| 1  | 1.96702528  | 0.54792714  | -3.58100176 | 1  | -1.50917459 | 3.22162700  | 1.92169833  |
| 1  | 1.04012537  | -0.83687288 | -4.16750145 | 1  | -1.89387465 | 1.55092704  | 2.38289809  |
| 1  | 5.04282570  | 1.22052705  | 0.39959830  |    |             |             |             |

---

# I-4H\_a

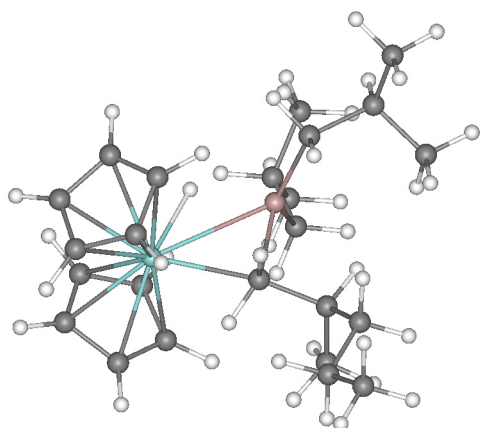

|                                             |                             |
|---------------------------------------------|-----------------------------|
| Zero-point vibrational energy               | 1592853.6 (Joules/Mol)      |
|                                             | 380.70114 (Kcal/Mol)        |
| Zero-point correction                       | 0.606686 (Hartree/Particle) |
| Thermal correction to Energy                | 0.638819                    |
| Thermal correction to Enthalpy              | 0.639763                    |
| Thermal correction to Gibbs Free Energy     | 0.543141                    |
| Sum of electronic and zero-point Energies   | -4721.872707                |
| Sum of electronic and thermal Energies      | -4721.840574                |
| Sum of electronic and thermal Enthalpies    | -4721.839629                |
| Sum of electronic and thermal Free Energies | -4721.936252                |

|    |            |             |             | cartesian |             |             |             |
|----|------------|-------------|-------------|-----------|-------------|-------------|-------------|
| 6  | 3.61376929 | -2.25745869 | 0.43127060  | 6         | 0.20796928  | 4.01534128  | 1.35607064  |
| 6  | 2.44126940 | -2.17995882 | 1.23077059  | 6         | -0.20163071 | 5.46624088  | 1.09997058  |
| 6  | 2.50286913 | -0.98265880 | 1.98187065  | 1         | 1.08776927  | 3.77654123  | 0.74397063  |
| 6  | 3.72586918 | -0.32425880 | 1.66177058  | 1         | 0.51346928  | 3.90564132  | 2.40227056  |
| 6  | 4.41646957 | -1.12145889 | 0.71777064  | 1         | 0.61056930  | 6.15614128  | 1.33807063  |
| 40 | 2.35176945 | -0.28675881 | -0.42382944 | 1         | -1.06443071 | 5.74044085  | 1.71287060  |
| 6  | 0.53156924 | 1.10364115  | 0.26827061  | 1         | -0.47643077 | 5.61724091  | 0.05217059  |
| 1  | 0.93486929 | -1.48775887 | -0.88472939 | 13        | -0.58153069 | -0.71945882 | -0.24742940 |
| 6  | 1.84626925 | 0.64174116  | -2.71442938 | 6         | -1.04073071 | -1.95775878 | 1.20877063  |
| 6  | 2.46776915 | -0.62215883 | -2.91432929 | 6         | -1.62733078 | -0.09505881 | -1.79262936 |
| 6  | 3.79926920 | -0.53415883 | -2.44132948 | 1         | -2.01413083 | -1.68555880 | 1.64507055  |
| 6  | 4.00466919 | 0.78284115  | -1.94242942 | 6         | -1.12083077 | -3.42985868 | 0.74427062  |
| 6  | 2.79836917 | 1.50904119  | -2.12932944 | 1         | -0.32563072 | -1.88725889 | 2.04117060  |
| 1  | 1.76666927 | -0.63805884 | 2.69587064  | 6         | -3.15953064 | -0.27505881 | -1.78382945 |
| 1  | 4.08236933 | 0.60564119  | 2.09077072  | 1         | -1.41953063 | 0.98034120  | -1.93282938 |
| 1  | 1.64296925 | -2.91085863 | 1.25827062  | 1         | -1.22163069 | -0.58075881 | -2.69482946 |
| 1  | 3.86796927 | -3.06525874 | -0.24452940 | 6         | -2.14173079 | -3.60265875 | -0.38342941 |
| 1  | 5.38656950 | -0.90295881 | 0.28857058  | 6         | -1.45313072 | -4.35805893 | 1.91567063  |

|   |             |             |             |   |             |             |             |
|---|-------------|-------------|-------------|---|-------------|-------------|-------------|
| 1 | 4.53746939  | -1.32625878 | -2.46742940 | 1 | -0.14173073 | -3.73275876 | 0.34327060  |
| 1 | 2.00386930  | -1.49165881 | -3.36242938 | 6 | -3.78083086 | 0.30634120  | -3.05732942 |
| 1 | 0.82436925  | 0.89034116  | -2.97632933 | 6 | -3.79273081 | 0.36664119  | -0.54702944 |
| 1 | 2.63596916  | 2.54654121  | -1.85892940 | 1 | -3.38643074 | -1.34735882 | -1.76082945 |
| 1 | 4.92976904  | 1.17834115  | -1.54122937 | 1 | -4.86193085 | 0.14094120  | -3.08462930 |
| 1 | 1.47966933  | 1.43064117  | 0.77487063  | 1 | -3.34713078 | -0.14745881 | -3.95312929 |
| 1 | 0.44276929  | 1.73084116  | -0.62632936 | 1 | -3.60513067 | 1.38694119  | -3.10832930 |
| 6 | -0.59413075 | 1.55434120  | 1.24697065  | 1 | -2.24803066 | -4.65385914 | -0.66592938 |
| 6 | -0.92933071 | 3.04324126  | 1.04047060  | 1 | -1.85503078 | -3.05035877 | -1.28762937 |
| 6 | -0.26783073 | 1.22814119  | 2.70607066  | 1 | -3.12653065 | -3.23905873 | -0.06702940 |
| 1 | -1.53223062 | 1.02454114  | 1.00517058  | 1 | -1.46903062 | -5.40655899 | 1.60347056  |
| 1 | -1.01723075 | 1.67004120  | 3.36827064  | 1 | -2.43903065 | -4.11285877 | 2.32487059  |
| 1 | 0.70856929  | 1.63164115  | 2.99567056  | 1 | -0.72213078 | -4.25535917 | 2.72387052  |
| 1 | -0.26933074 | 0.15104121  | 2.88877058  | 1 | -4.88403082 | 0.30084121  | -0.57892942 |
| 1 | -1.79353070 | 3.28744125  | 1.67017066  | 1 | -3.52923059 | 1.43074119  | -0.48632944 |
| 1 | -1.25543070 | 3.18964124  | 0.00207059  | 1 | -3.46733093 | -0.12125881 | 0.38017058  |

#### I-4H\_bi

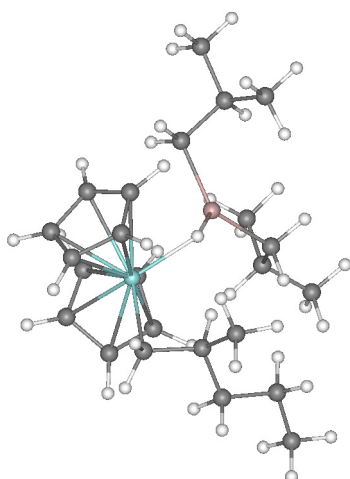

|                                             |                             |
|---------------------------------------------|-----------------------------|
| Zero-point vibrational energy               | 1589067.4 (Joules/Mol)      |
|                                             | 379.79623 (Kcal/Mol)        |
| Zero-point correction                       | 0.605244 (Hartree/Particle) |
| Thermal correction to Energy                | 0.638056                    |
| Thermal correction to Enthalpy              | 0.639001                    |
| Thermal correction to Gibbs Free Energy     | 0.539447                    |
| Sum of electronic and zero-point Energies   | -4721.861016                |
| Sum of electronic and thermal Energies      | -4721.828203                |
| Sum of electronic and thermal Enthalpies    | -4721.827259                |
| Sum of electronic and thermal Free Energies | -4721.926813                |

cartesian

|    |             |             |             |   |             |             |             |
|----|-------------|-------------|-------------|---|-------------|-------------|-------------|
| 6  | -2.80794263 | -3.53673816 | 0.00375737  | 6 | 2.69075727  | -1.76053822 | -0.11804263 |
| 6  | -1.80404258 | -3.80743814 | -0.95384264 | 1 | 2.48825741  | 1.76246190  | 1.13385737  |
| 6  | -0.53574264 | -3.65253830 | -0.32464263 | 6 | 2.17145729  | 2.38806176  | -0.90374261 |
| 6  | -0.76614261 | -3.31633830 | 1.03285742  | 1 | 0.81195736  | 2.09076190  | 0.77575737  |
| 6  | -2.16324258 | -3.21833825 | 1.23055732  | 6 | 4.00375748  | -1.49593818 | 0.65215737  |
| 1  | -2.65974259 | -2.98253822 | 2.16345739  | 1 | 2.27005744  | -2.71513820 | 0.23015738  |
| 1  | -3.87604260 | -3.57423830 | -0.16514263 | 1 | 2.90615749  | -1.89953816 | -1.18794262 |
| 1  | -1.97014260 | -4.10433817 | -1.98194265 | 6 | 3.46085739  | 1.79146171  | -1.47524261 |
| 1  | 0.43045738  | -3.81853819 | -0.78544265 | 6 | 2.36295748  | 3.87666202  | -0.60024261 |
| 1  | -0.00464264 | -3.15323830 | 1.78575742  | 1 | 1.39015734  | 2.31106186  | -1.67314267 |
| 6  | -1.04664266 | 0.69616175  | -1.87054265 | 6 | 5.03145742  | -2.59953809 | 0.39135736  |
| 6  | -2.20554256 | 0.09736177  | -2.39994264 | 6 | 3.72175741  | -1.37113822 | 2.15225744  |
| 6  | -1.85394263 | -1.19023824 | -2.89634252 | 1 | 4.42985725  | -0.54593825 | 0.30235738  |
| 6  | -0.46454263 | -1.37323821 | -2.70744252 | 1 | 5.97015762  | -2.40013838 | 0.91625738  |
| 6  | 0.04115736  | -0.21543823 | -2.06294250 | 1 | 5.25305748  | -2.68933821 | -0.67554265 |
| 1  | 1.09935737  | 0.05136177  | -2.03994274 | 1 | 4.64875746  | -3.56483817 | 0.74025738  |
| 1  | -0.97194266 | 1.68706179  | -1.43314266 | 1 | 3.79255724  | 2.33676171  | -2.36274266 |
| 1  | -3.19084263 | 0.53946173  | -2.44284272 | 1 | 3.35005736  | 0.73646176  | -1.76464260 |
| 1  | -2.52904272 | -1.88643825 | -3.37884259 | 1 | 4.26425743  | 1.84216189  | -0.73154265 |
| 1  | 0.11805737  | -2.23303819 | -3.01464272 | 1 | 2.65385747  | 4.43086147  | -1.49724269 |
| 40 | -1.57074261 | -1.38133824 | -0.40934262 | 1 | 3.14725733  | 4.01376152  | 0.15145737  |
| 1  | -0.05804265 | -0.77073824 | 0.75035739  | 1 | 1.44245744  | 4.32086134  | -0.20954263 |
| 1  | -1.79684258 | 0.42306176  | 0.87195742  | 1 | 4.63525724  | -1.18073821 | 2.72165728  |
| 6  | -3.62334251 | -0.60703826 | 0.17205736  | 1 | 3.27625728  | -2.29633832 | 2.53615737  |
| 6  | -2.93394256 | 0.46946177  | 0.99505734  | 1 | 3.03025746  | -0.54613823 | 2.38135743  |
| 6  | -3.27644253 | 1.89036179  | 0.51545739  | 1 | -4.17824268 | 0.48536178  | 2.76135731  |
| 1  | -4.18314266 | -1.30573821 | 0.79465735  | 1 | -2.50564265 | 0.98496175  | 3.08005738  |
| 1  | -4.28234291 | -0.20553824 | -0.59714264 | 1 | -2.88654256 | -0.72003824 | 2.82745743  |
| 6  | -2.38144255 | 2.99746180  | 1.07095742  | 6 | -2.68644261 | 4.35326147  | 0.43435735  |
| 1  | -4.32164240 | 2.08446169  | 0.78725737  | 1 | -1.32854259 | 2.73716187  | 0.89235735  |
| 1  | -3.24144268 | 1.92006183  | -0.58034265 | 1 | -2.50004268 | 3.07066178  | 2.15645742  |
| 6  | -3.13104272 | 0.29636177  | 2.50715733  | 1 | -2.04494262 | 5.13686132  | 0.84285736  |
| 13 | 1.43095744  | -0.29513824 | 0.15645736  | 1 | -3.72514272 | 4.64356136  | 0.61465734  |
| 6  | 1.71565747  | 1.62466168  | 0.36075735  | 1 | -2.53314257 | 4.32306147  | -0.64904261 |

# I-4H\_bo

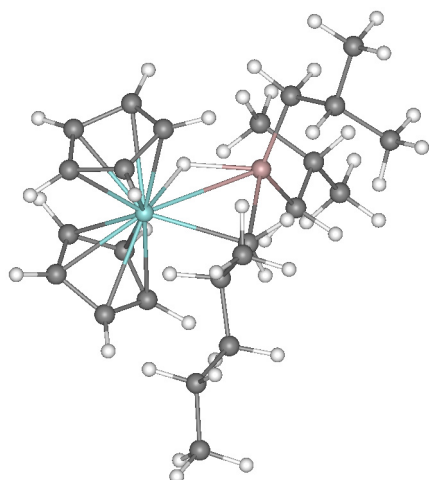

|                                             |                             |
|---------------------------------------------|-----------------------------|
| Zero-point vibrational energy               | 1591929.3 (Joules/Mol)      |
|                                             | 380.48023 (Kcal/Mol)        |
| Zero-point correction                       | 0.606334 (Hartree/Particle) |
| Thermal correction to Energy                | 0.638491                    |
| Thermal correction to Enthalpy              | 0.639436                    |
| Thermal correction to Gibbs Free Energy     | 0.542098                    |
| Sum of electronic and zero-point Energies   | -4721.885706                |
| Sum of electronic and thermal Energies      | -4721.853548                |
| Sum of electronic and thermal Enthalpies    | -4721.852604                |
| Sum of electronic and thermal Free Energies | -4721.949942                |

| cartesian |             |             |             |    |             |             |             |
|-----------|-------------|-------------|-------------|----|-------------|-------------|-------------|
| 6         | -0.62101316 | 1.18547797  | 2.63040280  | 1  | -2.78311324 | 2.97777796  | -0.20739710 |
| 6         | -2.04071307 | 1.19587803  | 2.58180285  | 1  | -1.37281322 | 3.16987777  | -1.25949717 |
| 6         | -2.51521325 | 0.00997794  | 3.19090295  | 1  | -1.14741325 | 2.83397794  | 0.45960289  |
| 6         | -1.38591325 | -0.72762209 | 3.64660287  | 1  | -2.41051316 | -0.24542207 | -2.30199718 |
| 6         | -0.22101320 | 0.00397794  | 3.31410289  | 1  | -1.95311320 | 1.34797800  | -2.87159705 |
| 1         | 0.79608679  | -0.28152207 | 3.54920292  | 1  | -3.90641332 | -2.39892220 | 1.79190290  |
| 1         | 0.04408678  | 1.96137798  | 2.26840305  | 1  | -3.55461335 | -0.26152205 | 3.32670283  |
| 1         | -2.65911317 | 1.97687805  | 2.15540290  | 13 | 1.51678681  | -0.28472206 | 0.12930287  |
| 1         | -1.41411328 | -1.66462207 | 4.18800259  | 6  | 2.53508687  | 1.04847801  | 1.15160286  |
| 6         | -1.65671325 | -2.41412210 | -0.68199718 | 6  | 2.23518682  | -1.42202199 | -1.29199708 |
| 6         | -2.94141316 | -2.05152202 | -0.18899715 | 1  | 3.58818674  | 0.72517794  | 1.14800286  |
| 6         | -3.04081321 | -2.50112224 | 1.14970291  | 6  | 2.48448682  | 2.48647785  | 0.59350288  |
| 6         | -1.81891322 | -3.14412212 | 1.48820293  | 1  | 2.24978685  | 1.05807793  | 2.21260285  |
| 6         | -0.97281325 | -3.10542226 | 0.35020289  | 6  | 3.62088680  | -1.99492204 | -0.92949712 |
| 1         | 0.01958680  | -3.53232217 | 0.28020287  | 1  | 1.55178678  | -2.26022220 | -1.50679708 |
| 1         | -1.27831316 | -2.24102211 | -1.68199706 | 1  | 2.30838680  | -0.85692209 | -2.23279715 |
| 1         | -3.71961331 | -1.53962207 | -0.74439716 | 6  | 3.02858686  | 2.53707790  | -0.83809710 |

|    |             |             |             |   |            |             |             |
|----|-------------|-------------|-------------|---|------------|-------------|-------------|
| 1  | -1.58881319 | -3.62112212 | 2.43250299  | 6 | 3.25688672 | 3.46047783  | 1.48760283  |
| 40 | -1.26751316 | -0.73322207 | 1.14770293  | 1 | 1.43588674 | 2.82697797  | 0.56900287  |
| 1  | 0.57128680  | -1.25842202 | 1.22630286  | 6 | 4.15998697 | -2.90212226 | -2.03809714 |
| 1  | -4.05241299 | 2.32197785  | -2.01899719 | 6 | 3.56058669 | -2.75522208 | 0.39900288  |
| 6  | -2.49341321 | 0.82417792  | -2.07339716 | 1 | 4.32048702 | -1.15692210 | -0.80839717 |
| 6  | -3.96661329 | 1.23327804  | -2.08949709 | 1 | 5.15928698 | -3.27762222 | -1.79819703 |
| 6  | -4.67581320 | 0.74977791  | -3.35419703 | 1 | 4.21778679 | -2.36842203 | -2.99069715 |
| 1  | -4.47281313 | 0.82537788  | -1.20289707 | 1 | 3.49948668 | -3.76562214 | -2.17589712 |
| 1  | -5.72201300 | 1.06107795  | -3.36409712 | 1 | 2.99808669 | 3.55217791  | -1.24379706 |
| 1  | -4.64871311 | -0.34162205 | -3.42969704 | 1 | 2.46828675 | 1.89127791  | -1.52779710 |
| 1  | -4.19681311 | 1.15717793  | -4.24849701 | 1 | 4.07088709 | 2.20027781  | -0.85689712 |
| 6  | -0.34651321 | 0.52757794  | -0.73249710 | 1 | 3.19848680 | 4.48507786  | 1.10820293  |
| 6  | -1.76511323 | 1.11597800  | -0.74999714 | 1 | 4.31348705 | 3.17577791  | 1.53040290  |
| 6  | -1.77371323 | 2.61097789  | -0.40789711 | 1 | 2.86788678 | 3.45317793  | 2.51040292  |
| 1  | 0.33538678  | 1.39267802  | -0.77279711 | 1 | 4.52658701 | -3.19792223 | 0.65770292  |
| 1  | -0.18891320 | -0.04982206 | -1.64929712 | 1 | 2.82868671 | -3.57052207 | 0.33890289  |
| 1  | -2.46761322 | 0.64797789  | 0.01860288  | 1 | 3.27208686 | -2.10542202 | 1.23790288  |

#### TS-4H

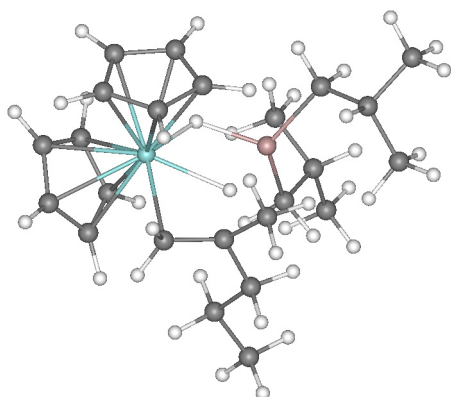

|                                             |                             |
|---------------------------------------------|-----------------------------|
| Zero-point vibrational energy               | 1580072.3 (Joules/Mol)      |
|                                             | 377.64633 (Kcal/Mol)        |
| Zero-point correction                       | 0.601818 (Hartree/Particle) |
| Thermal correction to Energy                | 0.633588                    |
| Thermal correction to Enthalpy              | 0.634532                    |
| Thermal correction to Gibbs Free Energy     | 0.539886                    |
| Sum of electronic and zero-point Energies   | -4721.854443                |
| Sum of electronic and thermal Energies      | -4721.822673                |
| Sum of electronic and thermal Enthalpies    | -4721.821729                |
| Sum of electronic and thermal Free Energies | -4721.916374                |

cartesian

---

|    |             |             |             |   |             |             |             |
|----|-------------|-------------|-------------|---|-------------|-------------|-------------|
| 6  | -2.07542920 | -2.21796179 | 1.30722070  | 6 | 1.60037065  | 2.05113816  | 0.99902058  |
| 6  | -2.81762934 | -1.42776167 | 2.23362064  | 1 | 2.36197066  | -1.46936166 | -0.37327939 |
| 6  | -4.05502939 | -1.10296166 | 1.62892067  | 6 | 2.91507077  | -1.43786168 | 1.72832060  |
| 6  | -4.06182957 | -1.63376176 | 0.31602061  | 1 | 1.22217059  | -2.28486180 | 0.68162060  |
| 6  | -2.84552932 | -2.34816194 | 0.13482061  | 6 | 2.17897081  | 2.78053808  | -0.23147939 |
| 1  | -2.57122922 | -2.91306186 | -0.74457937 | 1 | 0.91337067  | 2.72013807  | 1.53372061  |
| 1  | -1.09842932 | -2.65116191 | 1.48612070  | 1 | 2.43277073  | 1.88093829  | 1.70352066  |
| 1  | -2.50442934 | -1.16226172 | 3.23572063  | 6 | 3.71427059  | -2.74226189 | 1.68232071  |
| 1  | -4.85772943 | -0.53766179 | 2.08432055  | 6 | 2.24907064  | -1.26556170 | 3.09742069  |
| 1  | -4.87172937 | -1.56036174 | -0.39937943 | 1 | 3.61747074  | -0.60586178 | 1.58302069  |
| 6  | -3.33482933 | 1.89063823  | 1.79352069  | 6 | 3.09397078  | 1.85803831  | -1.04127932 |
| 6  | -3.97352934 | 1.93993831  | 0.52072060  | 6 | 2.93387079  | 4.04633808  | 0.18392061  |
| 6  | -3.03122926 | 2.42493820  | -0.41687942 | 1 | 1.34807062  | 3.09323812  | -0.87997943 |
| 6  | -1.80062938 | 2.63013816  | 0.25772062  | 1 | 3.54117060  | 2.37693810  | -1.89407945 |
| 6  | -2.00162935 | 2.31753826  | 1.63182068  | 1 | 2.55887079  | 0.98223823  | -1.43547940 |
| 1  | -1.26372933 | 2.40103817  | 2.41892076  | 1 | 3.91077089  | 1.48283827  | -0.41317940 |
| 1  | -3.79272914 | 1.59523833  | 2.72862077  | 1 | 4.49437094  | -2.76016188 | 2.44912076  |
| 1  | -5.01022911 | 1.70173824  | 0.31512061  | 1 | 4.19227076  | -2.87656188 | 0.70812058  |
| 1  | -3.23392916 | 2.62693810  | -1.45987940 | 1 | 3.05277085  | -3.59866190 | 1.85462070  |
| 1  | -0.88292933 | 3.01663828  | -0.17127939 | 1 | 2.97247076  | -1.34496176 | 3.91342068  |
| 40 | -2.25522923 | 0.13513824  | 0.36082059  | 1 | 1.48547077  | -2.03746176 | 3.25222063  |
| 6  | -0.52242929 | 1.47813833  | -2.67097926 | 1 | 1.76057076  | -0.28516176 | 3.20502067  |
| 6  | -0.96062928 | 0.11593823  | -2.16267943 | 1 | 3.29677081  | 4.59793806  | -0.68847942 |
| 6  | -2.35592937 | -0.14036176 | -2.06837940 | 1 | 3.79957056  | 3.78613806  | 0.80232060  |
| 6  | 0.01557070  | -0.98186177 | -2.57307935 | 1 | 2.29407072  | 4.71433830  | 0.76712060  |
| 6  | -0.23582929 | -2.39846182 | -2.07377934 | 1 | 0.51067072  | 1.70453823  | -2.39617944 |
| 1  | 1.03347063  | -0.67226177 | -2.30567932 | 1 | -1.17172933 | 2.28733826  | -2.33837938 |
| 1  | -0.01782930 | -0.98016173 | -3.67177939 | 1 | -0.57582927 | 1.43863833  | -3.76447940 |
| 1  | -0.47362930 | 0.23853824  | -0.71687943 | 6 | 0.87167066  | -3.35416174 | -2.51987934 |
| 1  | -2.68712926 | -1.15826166 | -2.24797940 | 1 | -1.19542933 | -2.76346183 | -2.45577931 |
| 1  | -3.02542925 | 0.62403822  | -2.45237923 | 1 | -0.29772928 | -2.39566183 | -0.97887939 |
| 1  | -0.66822928 | 0.08883823  | 1.52492070  | 1 | 0.68007070  | -4.36876202 | -2.16517925 |
| 13 | 0.83107072  | 0.26843822  | 0.72542059  | 1 | 1.84277081  | -3.03936195 | -2.12787938 |
| 6  | 1.85857081  | -1.39136171 | 0.60072058  | 1 | 0.94297069  | -3.38716173 | -3.61047935 |

---

## I-5H

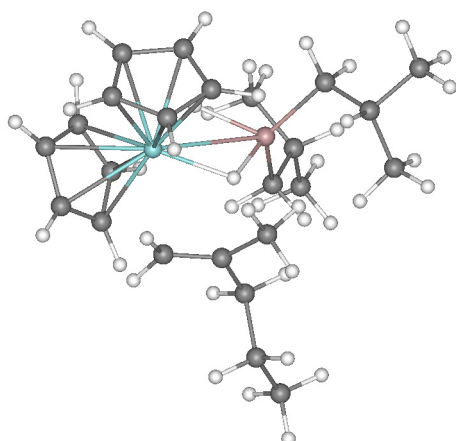

|                                             |                             |
|---------------------------------------------|-----------------------------|
| Zero-point vibrational energy               | 1579373.0 (Joules/Mol)      |
|                                             | 377.47920 (Kcal/Mol)        |
| Zero-point correction                       | 0.601551 (Hartree/Particle) |
| Thermal correction to Energy                | 0.633967                    |
| Thermal correction to Enthalpy              | 0.634911                    |
| Thermal correction to Gibbs Free Energy     | 0.536965                    |
| Sum of electronic and zero-point Energies   | -4721.867363                |
| Sum of electronic and thermal Energies      | -4721.834948                |
| Sum of electronic and thermal Enthalpies    | -4721.834003                |
| Sum of electronic and thermal Free Energies | -4721.931949                |

| cartesian |            |             |             |    |             |             |             |
|-----------|------------|-------------|-------------|----|-------------|-------------|-------------|
| 6         | 3.63226628 | -0.11810585 | 1.98063087  | 1  | 0.33316630  | 2.15319419  | 1.63293087  |
| 6         | 3.91916633 | -1.44790590 | 1.60383093  | 6  | -1.07463360 | 4.49129438  | 1.99563098  |
| 6         | 2.75856638 | -2.23060584 | 1.82583094  | 1  | -0.17423373 | 4.73259401  | 0.05063094  |
| 6         | 1.76996636 | -1.38910592 | 2.41013098  | 1  | 0.99206626  | 4.55089426  | 1.35273087  |
| 6         | 2.29656625 | -0.08580586 | 2.49143100  | 1  | -1.14113379 | 5.56279421  | 2.19323111  |
| 1         | 1.79216623 | 0.77639419  | 2.91053104  | 1  | -0.88233370 | 3.98599434  | 2.94623113  |
| 1         | 4.32716608 | 0.71169418  | 1.94383097  | 1  | -2.04813361 | 4.15629435  | 1.62723088  |
| 1         | 4.85746622 | -1.80330586 | 1.19693089  | 13 | -0.86703366 | -1.03900588 | -0.12396906 |
| 1         | 2.65196633 | -3.29180574 | 1.63753092  | 6  | -1.88453364 | -0.78800583 | 1.53073096  |
| 1         | 0.78156626 | -1.70230591 | 2.72083116  | 6  | -1.63583374 | -1.52480590 | -1.86386907 |
| 6         | 3.08996630 | -0.07580586 | -2.25926900 | 1  | -2.45203376 | 0.15179415  | 1.44833088  |
| 6         | 3.99066639 | -0.94670582 | -1.60356903 | 6  | -2.86353374 | -1.94930589 | 1.80293095  |
| 6         | 3.34176636 | -2.20540595 | -1.44956911 | 1  | -1.23473382 | -0.65150583 | 2.40853095  |
| 6         | 2.04396629 | -2.10010576 | -2.00216913 | 6  | -2.06423354 | -0.32230586 | -2.73276901 |
| 6         | 1.87476635 | -0.77160585 | -2.48356891 | 1  | -0.98093373 | -2.18330574 | -2.45046902 |
| 1         | 0.99256629 | -0.38410586 | -2.97926903 | 1  | -2.53443360 | -2.12780595 | -1.65696907 |
| 1         | 3.30746627 | 0.94119412  | -2.55606890 | 6  | -3.66723347 | -1.71810591 | 3.08483100  |

---

|    |             |             |             |   |             |             |             |
|----|-------------|-------------|-------------|---|-------------|-------------|-------------|
| 1  | 5.00836658  | -0.71100587 | -1.31736910 | 6 | -2.11623359 | -3.28410578 | 1.87523091  |
| 1  | 3.77496624  | -3.09720588 | -1.01466906 | 1 | -3.57313347 | -2.00490594 | 0.96633095  |
| 1  | 1.31156635  | -2.89410567 | -2.05926895 | 6 | -2.90583372 | 0.67259419  | -1.92826903 |
| 40 | 2.12746620  | -0.60810584 | 0.02253094  | 6 | -2.82573366 | -0.78040582 | -3.97956896 |
| 1  | 0.67006630  | -1.88570595 | 0.10753094  | 1 | -1.16093373 | 0.20559414  | -3.07386899 |
| 1  | 0.33396631  | 0.20039414  | -0.25916907 | 1 | -3.26063371 | 1.49929416  | -2.55086899 |
| 6  | 2.48286629  | 2.15429425  | 0.07193094  | 1 | -2.33813357 | 1.11439407  | -1.09606910 |
| 6  | 1.20196629  | 2.38839412  | -0.32066908 | 1 | -3.78353357 | 0.17669414  | -1.49726903 |
| 6  | 0.81046629  | 2.55869412  | -1.76016903 | 1 | -4.39183378 | -2.52020574 | 3.25373101  |
| 6  | 0.12666631  | 2.68089414  | 0.69563091  | 1 | -4.21333361 | -0.77170587 | 3.04213095  |
| 1  | 2.73716640  | 2.25789428  | 1.12293088  | 1 | -2.99783373 | -1.68110585 | 3.95173097  |
| 1  | 3.30656624  | 2.18709421  | -0.63726908 | 1 | -2.79203367 | -4.11680603 | 2.08913112  |
| 1  | -0.03973371 | 1.91579401  | -2.01016903 | 1 | -1.36283374 | -3.25860572 | 2.67283106  |
| 1  | 0.47936630  | 3.59209418  | -1.91156912 | 1 | -1.60073376 | -3.52270579 | 0.93373090  |
| 1  | 1.63116622  | 2.36699414  | -2.45256901 | 1 | -3.08813357 | 0.06469415  | -4.62306929 |
| 6  | 0.02726626  | 4.19179440  | 0.98063093  | 1 | -3.75373363 | -1.28500593 | -3.69016886 |
| 1  | -0.84223372 | 2.32219434  | 0.32973093  | 1 | -2.23153377 | -1.48540592 | -4.56766939 |

---

### S3.7. <sup>i</sup>Bu<sub>2</sub>AlCl reaction profile

#### I-OCI

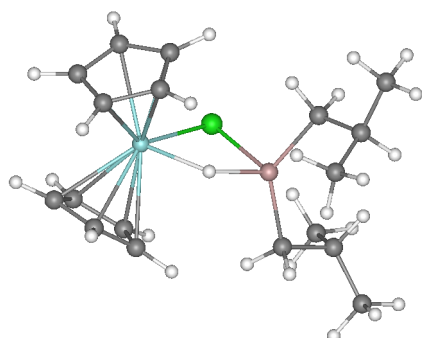

|                                             |                             |
|---------------------------------------------|-----------------------------|
| Zero-point vibrational energy               | 1119848.7 (Joules/Mol)      |
|                                             | 267.65027 (Kcal/Mol)        |
| Zero-point correction                       | 0.426528 (Hartree/Particle) |
| Thermal correction to Energy                | 0.452154                    |
| Thermal correction to Enthalpy              | 0.453098                    |
| Thermal correction to Gibbs Free Energy     | 0.369347                    |
| Sum of electronic and zero-point Energies   | -4945.900440                |
| Sum of electronic and thermal Energies      | -4945.874813                |
| Sum of electronic and thermal Enthalpies    | -4945.873869                |
| Sum of electronic and thermal Free Energies | -4945.957621                |

| cartesian |             |             |             |   |            |             |
|-----------|-------------|-------------|-------------|---|------------|-------------|
| 6         | -3.43925595 | 1.94134998  | 1.52393806  | 6 | 1.38784409 | 1.80414999  |
| 6         | -4.44755602 | 1.54955006  | 0.60443801  | 1 | 1.36404395 | -1.83284998 |
| 6         | -3.95105600 | 1.78174996  | -0.71056199 | 6 | 2.78894401 | -1.91114998 |
| 6         | -2.63965583 | 2.30804992  | -0.59676194 | 1 | 0.71694404 | -2.51594996 |
| 6         | -2.31985593 | 2.39575005  | 0.78533804  | 6 | 2.84104395 | 1.89915001  |
| 1         | -1.38275599 | 2.74675012  | 1.20203805  | 1 | 0.78184408 | 2.54935002  |
| 1         | -3.50315595 | 1.88454998  | 2.60483813  | 1 | 1.34554410 | 2.09225011  |
| 1         | -5.43445587 | 1.18355000  | 0.86033797  | 6 | 3.31814384 | -3.30905008 |
| 1         | -4.49005604 | 1.60895002  | -1.63406193 | 6 | 2.82764411 | -1.66425002 |
| 1         | -1.99345589 | 2.59555006  | -1.41696191 | 1 | 3.45084381 | -1.17935002 |
| 6         | -4.41365576 | -1.49304998 | -0.63116205 | 6 | 3.41994381 | 3.29434991  |
| 6         | -3.39445591 | -1.45525002 | -1.61736190 | 6 | 2.91644406 | 1.54955006  |
| 6         | -2.25095582 | -2.12325001 | -1.09286201 | 1 | 3.45574379 | 1.17684996  |
| 6         | -2.55595589 | -2.54305005 | 0.22353801  | 1 | 4.45774412 | 3.35945010  |
| 6         | -3.89255595 | -2.14785004 | 0.51343799  | 1 | 3.39474392 | 3.55005002  |
| 1         | -4.42735577 | -2.33964992 | 1.43713808  | 1 | 2.84034395 | 4.04885006  |
| 1         | -5.41505575 | -1.09445000 | -0.73596203 | 1 | 4.34494400 | -3.43785000 |

|    |             |             |             |   |            |             |             |
|----|-------------|-------------|-------------|---|------------|-------------|-------------|
| 1  | -3.48355603 | -1.03215003 | -2.61086202 | 1 | 3.30624390 | -3.49324989 | -1.20296192 |
| 1  | -1.31255591 | -2.28244996 | -1.60956192 | 1 | 2.69814396 | -4.07375002 | 0.35603800  |
| 1  | -1.88915586 | -3.06734991 | 0.89713800  | 1 | 3.82514381 | -1.84235001 | 2.12573791  |
| 40 | -2.58945584 | -0.04455002 | 0.26353800  | 1 | 2.12844396 | -2.33084989 | 2.23373795  |
| 17 | -0.79275590 | -0.36265004 | 2.05763793  | 1 | 2.55884409 | -0.62994999 | 1.97693801  |
| 1  | -0.93835592 | 0.18874997  | -0.71976197 | 1 | 3.94054413 | 1.61975002  | -2.01246190 |
| 13 | 0.62074405  | 0.02064998  | 0.15833801  | 1 | 2.29934406 | 2.24055004  | -2.22236204 |
| 6  | 1.35984397  | -1.71194994 | -0.34856197 | 1 | 2.56704402 | 0.52875000  | -1.84296203 |

### I-OCI\_bo

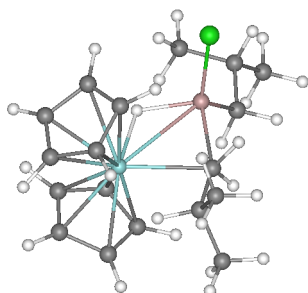

|                                             |                             |
|---------------------------------------------|-----------------------------|
| Zero-point vibrational energy               | 1123566.6 (Joules/Mol)      |
|                                             | 268.53886 (Kcal/Mol)        |
| Zero-point correction                       | 0.427944 (Hartree/Particle) |
| Thermal correction to Energy                | 0.452808                    |
| Thermal correction to Enthalpy              | 0.453752                    |
| Thermal correction to Gibbs Free Energy     | 0.372702                    |
| Sum of electronic and zero-point Energies   | -4945.899293                |
| Sum of electronic and thermal Energies      | -4945.874429                |
| Sum of electronic and thermal Enthalpies    | -4945.873485                |
| Sum of electronic and thermal Free Energies | -4945.954535                |

| cartesian |             |             |             |    |             |             |             |
|-----------|-------------|-------------|-------------|----|-------------|-------------|-------------|
| 6         | 2.06536794  | 2.21805620  | -0.67464805 | 1  | -0.41083199 | -0.32044393 | -1.98104811 |
| 6         | 2.46676803  | 2.39315605  | 0.67135197  | 13 | -1.39463198 | -0.89634395 | 0.14105196  |
| 6         | 1.29386806  | 2.49715614  | 1.46885192  | 17 | -1.63243198 | -2.79774380 | 1.04805195  |
| 6         | 0.16946800  | 2.40605617  | 0.60885197  | 6  | -2.89883208 | 0.06755607  | -0.61674798 |
| 6         | 0.64246798  | 2.21025610  | -0.71384811 | 6  | -4.13183212 | 0.09225607  | 0.31075197  |
| 1         | 0.02376799  | 2.13365626  | -1.59974802 | 1  | -2.59863210 | 1.10415602  | -0.84274805 |
| 1         | 2.73046803  | 2.12965608  | -1.52624810 | 1  | -3.17303205 | -0.37704393 | -1.58364809 |
| 1         | 3.48716784  | 2.46775627  | 1.02505195  | 6  | -5.28433228 | 0.86905599  | -0.32984802 |
| 1         | 1.26096809  | 2.66715622  | 2.53755188  | 6  | -3.77643204 | 0.68935609  | 1.67505193  |
| 1         | -0.86823207 | 2.47875619  | 0.91005194  | 1  | -4.46293211 | -0.94124389 | 0.46985197  |
| 6         | 3.28446794  | -0.47154394 | 1.99325192  | 1  | -6.17323208 | 0.85795605  | 0.30715197  |

|    |             |             |             |   |             |             |             |
|----|-------------|-------------|-------------|---|-------------|-------------|-------------|
| 6  | 2.17026806  | -0.33644393 | 2.87005186  | 1 | -5.55753231 | 0.44225606  | -1.29874802 |
| 6  | 1.24626803  | -1.36644399 | 2.56685185  | 1 | -4.99803209 | 1.91455615  | -0.49064800 |
| 6  | 1.76796806  | -2.12214398 | 1.48245192  | 1 | -4.64993191 | 0.74065602  | 2.33045197  |
| 6  | 3.04006791  | -1.58114398 | 1.14925194  | 1 | -3.39123201 | 1.71045601  | 1.55905199  |
| 1  | 3.71616793  | -1.95704401 | 0.38985199  | 1 | -3.01733208 | 0.09555608  | 2.20335197  |
| 1  | 4.18116808  | 0.13515607  | 2.00025201  | 6 | 2.18596792  | -2.38904381 | -2.01574802 |
| 1  | 2.06656790  | 0.39755610  | 3.65925193  | 1 | 2.39146781  | -0.45594394 | -1.17244804 |
| 1  | 0.30706799  | -1.55824399 | 3.07065201  | 6 | 1.76946807  | -0.18504393 | -3.16684794 |
| 1  | 1.29356802  | -2.99474382 | 1.05025196  | 1 | 3.24896789  | -2.37124395 | -2.26994801 |
| 40 | 1.32876801  | 0.16855606  | 0.57785201  | 1 | 1.65386808  | -2.88494396 | -2.83224797 |
| 6  | 0.19206800  | -0.95134389 | -1.31774807 | 1 | 2.04966807  | -2.99224377 | -1.11594808 |
| 1  | -0.46293199 | 0.01225607  | 1.26645195  | 1 | 2.81416798  | -0.13234393 | -3.48494816 |
| 1  | -0.18183200 | -1.98244393 | -1.42394805 | 1 | 1.37816799  | 0.83165610  | -3.08294797 |
| 6  | 1.63546801  | -0.96724391 | -1.85404801 | 1 | 1.20226800  | -0.69824398 | -3.94814801 |

## I-1Cl

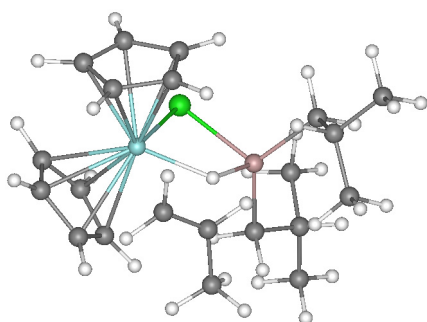

|                                             |                             |
|---------------------------------------------|-----------------------------|
| Zero-point vibrational energy               | 1340335.2 (Joules/Mol)      |
|                                             | 320.34781 (Kcal/Mol)        |
| Zero-point correction                       | 0.510507 (Hartree/Particle) |
| Thermal correction to Energy                | 0.540765                    |
| Thermal correction to Enthalpy              | 0.541709                    |
| Thermal correction to Gibbs Free Energy     | 0.448968                    |
| Sum of electronic and zero-point Energies   | -5063.676833                |
| Sum of electronic and thermal Energies      | -5063.646575                |
| Sum of electronic and thermal Enthalpies    | -5063.645631                |
| Sum of electronic and thermal Free Energies | -5063.738372                |

## cartesian

|   |             |             |             |    |             |             |             |
|---|-------------|-------------|-------------|----|-------------|-------------|-------------|
| 6 | -2.73219657 | -2.01865935 | -1.46533215 | 1  | -1.10809660 | -0.69795930 | -3.51973224 |
| 6 | -3.74439669 | -2.04245949 | -0.48023215 | 1  | -0.66049665 | 1.80604064  | -1.72613215 |
| 6 | -3.18379664 | -2.61755943 | 0.69996786  | 13 | 1.22750330  | -0.17745931 | 0.66956782  |
| 6 | -1.83629656 | -2.94415951 | 0.42536786  | 6  | 1.79800344  | 1.61084068  | 1.23236787  |
| 6 | -1.53609669 | -2.53595924 | -0.89953220 | 6  | 2.22050333  | -1.57875931 | -0.26693216 |

|    |             |             |             |   |            |             |             |
|----|-------------|-------------|-------------|---|------------|-------------|-------------|
| 1  | -0.58589667 | -2.66125917 | -1.40543222 | 1 | 2.89430332 | 1.61984074  | 1.33066785  |
| 1  | -2.85359669 | -1.68935931 | -2.48713207 | 6 | 1.39010334 | 2.71534061  | 0.23856786  |
| 1  | -4.77229643 | -1.72825933 | -0.61433220 | 1 | 1.41590333 | 1.84304059  | 2.23586798  |
| 1  | -3.70619655 | -2.81585932 | 1.62756777  | 6 | 3.66650343 | -1.68085933 | 0.26856786  |
| 1  | -1.14119673 | -3.39615917 | 1.11946785  | 1 | 1.72550344 | -2.55285931 | -0.12813213 |
| 6  | -2.75599670 | 1.95464075  | 0.93006790  | 1 | 2.24800348 | -1.40145934 | -1.35163212 |
| 6  | -3.94619656 | 1.19024074  | 0.73406786  | 6 | 1.96170330 | 2.42484045  | -1.15343213 |
| 6  | -4.03999662 | 0.26114067  | 1.80006778  | 6 | 1.83020329 | 4.10204077  | 0.71476781  |
| 6  | -2.89049673 | 0.39944071  | 2.60766792  | 1 | 0.28960335 | 2.72354078  | 0.16276786  |
| 6  | -2.10089660 | 1.46164072  | 2.07206798  | 6 | 4.43770361 | -2.80565929 | -0.42583212 |
| 1  | -1.15599668 | 1.81344068  | 2.46956778  | 6 | 3.66990328 | -1.88665926 | 1.78646779  |
| 1  | -2.40369678 | 2.77104092  | 0.31066787  | 1 | 4.18130350 | -0.73465931 | 0.05256785  |
| 1  | -4.68929672 | 1.33984065  | -0.03953215 | 1 | 5.47390318 | -2.85245943 | -0.07783213 |
| 1  | -4.84549665 | -0.44535932 | 1.95516777  | 1 | 4.45020342 | -2.66515923 | -1.51033223 |
| 1  | -2.65279651 | -0.18155931 | 3.48956776  | 1 | 3.96830320 | -3.77325916 | -0.21613213 |
| 40 | -2.06379676 | -0.41785932 | 0.38426787  | 1 | 1.65980339 | 3.17974091  | -1.88713217 |
| 17 | -0.15869668 | -1.09195924 | 2.24346781  | 1 | 1.64800334 | 1.44234073  | -1.53653216 |
| 1  | -0.26839668 | 0.10984069  | -0.21573213 | 1 | 3.05680346 | 2.41554070  | -1.11833215 |
| 6  | -2.58569670 | 1.07814074  | -2.12173223 | 1 | 1.51470327 | 4.88674068  | 0.01986787  |
| 6  | -1.23909664 | 1.01884067  | -2.20903206 | 1 | 2.92130327 | 4.14334059  | 0.79696786  |
| 6  | -0.46689668 | 0.05614069  | -3.05903220 | 1 | 1.41350341 | 4.33004045  | 1.69986784  |
| 1  | -3.22379661 | 0.40524065  | -2.68743229 | 1 | 4.68510342 | -2.00895929 | 2.17356777  |
| 1  | -3.07199669 | 1.93454063  | -1.67033219 | 1 | 3.09860349 | -2.78305912 | 2.05466795  |
| 1  | 0.01640332  | 0.62194067  | -3.86283207 | 1 | 3.22690344 | -1.03615928 | 2.32446790  |
| 1  | 0.32950330  | -0.43755931 | -2.49483228 |   |            |             |             |

## TS-1Cl

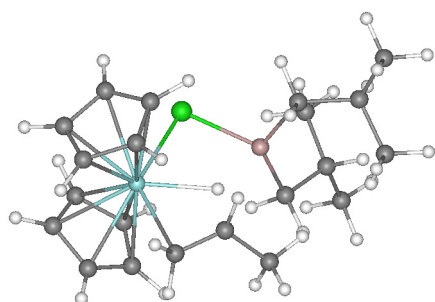

|                                           |                             |
|-------------------------------------------|-----------------------------|
| Zero-point vibrational energy             | 1336885.7 (Joules/Mol)      |
|                                           | 319.52335 (Kcal/Mol)        |
| Zero-point correction                     | 0.509193 (Hartree/Particle) |
| Thermal correction to Energy              | 0.538692                    |
| Thermal correction to Enthalpy            | 0.539636                    |
| Thermal correction to Gibbs Free Energy   | 0.448350                    |
| Sum of electronic and zero-point Energies | -5063.668796                |

|                                             |              |
|---------------------------------------------|--------------|
| Sum of electronic and thermal Energies      | -5063.639296 |
| Sum of electronic and thermal Enthalpies    | -5063.638352 |
| Sum of electronic and thermal Free Energies | -5063.729638 |

| cartesian |             |             |             |    |             |             |             |   |  |
|-----------|-------------|-------------|-------------|----|-------------|-------------|-------------|---|--|
| 6         | 2.57411003  | 2.25316954  | -1.02201188 | 1  | 0.16791016  | 0.80236953  | -2.84051180 | 1 |  |
| 6         | 3.88921022  | 1.69696951  | -1.06941187 |    | 0.79261017  | -1.95683050 | -1.58831191 |   |  |
| 6         | 4.39601040  | 1.67216945  | 0.24698816  | 13 | -0.93638980 | 0.10036954  | 0.49388814  |   |  |
| 6         | 3.39141011  | 2.17396951  | 1.11988819  | 6  | -1.64888978 | -1.70873046 | 0.71478814  |   |  |
| 6         | 2.28551006  | 2.56876969  | 0.32008815  | 6  | -1.70918989 | 1.73626947  | -0.24771182 |   |  |
| 1         | 1.36301017  | 2.99736953  | 0.68968815  | 1  | -1.47458982 | -2.00373030 | 1.76008809  |   |  |
| 1         | 1.92411017  | 2.43446970  | -1.86991191 | 6  | -3.14728975 | -1.86543036 | 0.37508816  |   |  |
| 1         | 4.42621040  | 1.39106965  | -1.95771194 | 1  | -1.08018982 | -2.43363047 | 0.10938817  |   |  |
| 1         | 5.38200998  | 1.33206964  | 0.53558815  | 6  | -3.08898973 | 2.00916958  | 0.39968818  |   |  |
| 1         | 3.47081017  | 2.28566957  | 2.19448829  | 1  | -1.04628980 | 2.58576965  | -0.02301185 |   |  |
| 6         | 3.02271008  | -2.44453049 | 0.25268817  | 1  | -1.81578994 | 1.71276951  | -1.33931184 |   |  |
| 6         | 4.24400997  | -1.73983049 | 0.41288817  | 6  | -3.64208984 | -3.26833034 | 0.73818815  |   |  |
| 6         | 4.20261002  | -1.09173036 | 1.67918813  | 6  | -3.41189003 | -1.57713056 | -1.10461187 |   |  |
| 6         | 2.94921017  | -1.35473037 | 2.26708817  | 1  | -3.72248983 | -1.14303041 | 0.97038817  |   |  |
| 6         | 2.20851016  | -2.18573046 | 1.37748814  | 6  | -3.63598967 | 3.37316966  | -0.02811183 |   |  |
| 1         | 1.21051025  | -2.57213044 | 1.55138814  | 6  | -3.01208973 | 1.91936946  | 1.92738807  |   |  |
| 1         | 2.75791025  | -3.07263041 | -0.58881181 | 1  | -3.79158974 | 1.24056959  | 0.05138816  |   |  |
| 1         | 5.08201027  | -1.74353051 | -0.27411181 | 1  | -4.63348961 | 3.54736948  | 0.38568819  |   |  |
| 1         | 4.99711037  | -0.50543046 | 2.12248826  | 1  | -3.70208979 | 3.44866967  | -1.11701190 |   |  |
| 1         | 2.60711002  | -0.99203044 | 3.22728801  | 1  | -2.97898984 | 4.17446947  | 0.32748818  |   |  |
| 40        | 2.49221015  | 0.04026954  | 0.21528816  | 1  | -4.71038961 | -3.37973046 | 0.53148818  |   |  |
| 17        | 0.53211015  | 0.61926955  | 2.10658813  | 1  | -3.47789001 | -3.48363042 | 1.79758811  |   |  |
| 1         | 0.64241016  | -0.30903047 | -0.54491180 | 1  | -3.10508990 | -4.02353048 | 0.15328816  |   |  |
| 6         | 2.41111016  | -0.68773049 | -2.16611195 | 1  | -4.46598959 | -1.72333050 | -1.35631192 |   |  |
| 6         | 1.05501020  | -0.96263045 | -1.95191193 | 1  | -2.82508993 | -2.25553036 | -1.73701191 |   |  |
| 6         | -0.02158982 | -0.26923046 | -2.75101185 | 1  | -3.15468979 | -0.54593045 | -1.37891185 |   |  |
| 1         | 2.64311028  | 0.13076954  | -2.84041190 | 1  | -3.97238970 | 2.16026950  | 2.39148808  |   |  |
| 1         | 3.12441015  | -1.50443053 | -2.15891194 | 1  | -2.26428986 | 2.61706948  | 2.32218814  |   |  |
| 1         | -0.00718981 | -0.70313048 | -3.75611186 | 1  | -2.74378991 | 0.91036952  | 2.27718806  |   |  |
| 1         | -1.01828980 | -0.42703047 | -2.33361197 |    |             |             |             |   |  |

# I-2Cl\_a

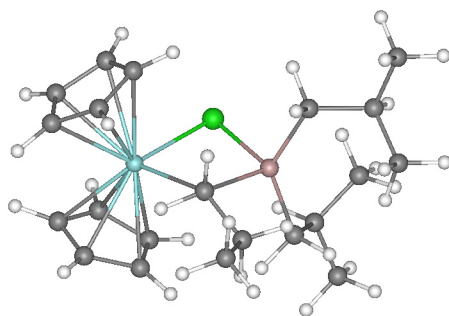

|                                             |                             |
|---------------------------------------------|-----------------------------|
| Zero-point vibrational energy               | 1349531.2 (Joules/Mol)      |
|                                             | 322.54569 (Kcal/Mol)        |
| Zero-point correction                       | 0.514009 (Hartree/Particle) |
| Thermal correction to Energy                | 0.543849                    |
| Thermal correction to Enthalpy              | 0.544793                    |
| Thermal correction to Gibbs Free Energy     | 0.453673                    |
| Sum of electronic and zero-point Energies   | -5063.695489                |
| Sum of electronic and thermal Energies      | -5063.665649                |
| Sum of electronic and thermal Enthalpies    | -5063.664705                |
| Sum of electronic and thermal Free Energies | -5063.755825                |

| cartesian |            |             |             |    |             |             |             |  |  |  |  |  |
|-----------|------------|-------------|-------------|----|-------------|-------------|-------------|--|--|--|--|--|
| 6         | 3.35046101 | 2.24961877  | 0.77360332  | 1  | 1.20366096  | -1.27238142 | -3.86959672 |  |  |  |  |  |
| 6         | 2.14476109 | 2.43821883  | 0.04100335  | 1  | -0.11673898 | 0.46501866  | -2.58759665 |  |  |  |  |  |
| 6         | 2.31876111 | 1.87341869  | -1.23949671 | 13 | -0.75833899 | -0.04178134 | 0.25740334  |  |  |  |  |  |
| 6         | 3.63526106 | 1.32781863  | -1.30799663 | 6  | -1.31753898 | 1.74061859  | -0.35539666 |  |  |  |  |  |
| 6         | 4.27726126 | 1.59071863  | -0.07189667 | 6  | -1.71873903 | -1.68058133 | 0.76020336  |  |  |  |  |  |
| 40        | 2.43686104 | -0.04068134 | 0.39200336  | 1  | -2.16883898 | 1.61121869  | -1.04199672 |  |  |  |  |  |
| 6         | 0.73846102 | -0.90958136 | -1.11199665 | 6  | -1.75713897 | 2.70281887  | 0.76700330  |  |  |  |  |  |
| 17        | 0.62086105 | 0.47061867  | 2.12980342  | 1  | -0.54403895 | 2.22621870  | -0.96949673 |  |  |  |  |  |
| 6         | 2.43616104 | -2.36538124 | 1.35400331  | 6  | -3.25883889 | -1.62028134 | 0.82500339  |  |  |  |  |  |
| 6         | 3.11436105 | -1.54468131 | 2.29340339  | 1  | -1.44633889 | -2.48168135 | 0.05320334  |  |  |  |  |  |
| 6         | 4.30016088 | -1.06698132 | 1.68890333  | 1  | -1.32873893 | -2.01058125 | 1.73470330  |  |  |  |  |  |
| 6         | 4.36846113 | -1.60618138 | 0.37060332  | 6  | -2.81183910 | 2.04851866  | 1.66400325  |  |  |  |  |  |
| 6         | 3.22596097 | -2.42228127 | 0.17820334  | 6  | -2.28513908 | 4.01951885  | 0.19070333  |  |  |  |  |  |
| 1         | 1.58426106 | 1.85691857  | -2.03539658 | 1  | -0.88723892 | 2.93561864  | 1.39750326  |  |  |  |  |  |
| 1         | 4.08456087 | 0.84801865  | -2.16989660 | 6  | -3.83393908 | -2.95688128 | 1.30240333  |  |  |  |  |  |
| 1         | 1.24266100 | 2.90651870  | 0.41730332  | 6  | -3.85213900 | -1.24828136 | -0.53599668 |  |  |  |  |  |
| 1         | 3.53386092 | 2.58051872  | 1.78960335  | 1  | -3.55453920 | -0.85098135 | 1.54890335  |  |  |  |  |  |
| 1         | 5.29676104 | 1.32891858  | 0.18170333  | 1  | -4.92453909 | -2.91578126 | 1.37800336  |  |  |  |  |  |
| 1         | 5.03776121 | -0.42618135 | 2.15600348  | 1  | -3.43713903 | -3.23178124 | 2.28380322  |  |  |  |  |  |
| 1         | 2.76616096 | -1.30508137 | 3.29030323  | 1  | -3.57573891 | -3.75578117 | 0.59790337  |  |  |  |  |  |

|   |             |             |             |   |             |             |             |
|---|-------------|-------------|-------------|---|-------------|-------------|-------------|
| 1 | 1.48696113  | -2.86318135 | 1.51670337  | 1 | -3.18133903 | 2.74371886  | 2.42300320  |
| 1 | 2.99026108  | -2.97778130 | -0.72169662 | 1 | -2.41393900 | 1.17341864  | 2.19570327  |
| 1 | 5.16886091  | -1.45348132 | -0.34289667 | 1 | -3.67083883 | 1.71771860  | 1.06730330  |
| 1 | 1.76166105  | -0.81248134 | -1.56789672 | 1 | -2.54973912 | 4.72451830  | 0.98440337  |
| 1 | 0.64756107  | -1.98278129 | -0.90809667 | 1 | -3.18213892 | 3.83811879  | -0.41119668 |
| 6 | -0.17413896 | -0.59608138 | -2.32789660 | 1 | -1.54143906 | 4.49771833  | -0.45439664 |
| 6 | 0.17576104  | -1.45838141 | -3.54249668 | 1 | -4.94533920 | -1.23598135 | -0.50519669 |
| 1 | -1.22643900 | -0.78588134 | -2.07019663 | 1 | -3.55253887 | -1.98078144 | -1.29639673 |
| 1 | -0.48873895 | -1.23678136 | -4.38029623 | 1 | -3.52543879 | -0.25708133 | -0.87239671 |
| 1 | 0.08106107  | -2.52158117 | -3.30649662 |   |             |             |             |

### I-2Cl\_bi

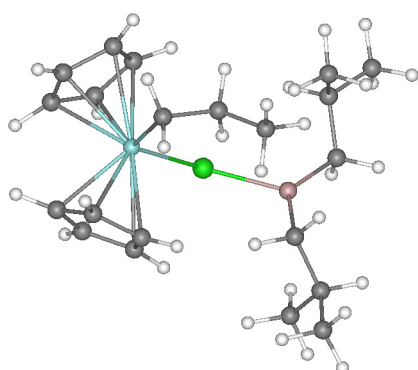

|                                             |                             |
|---------------------------------------------|-----------------------------|
| Zero-point vibrational energy               | 1346417.7 (Joules/Mol)      |
|                                             | 321.80156 (Kcal/Mol)        |
| Zero-point correction                       | 0.512823 (Hartree/Particle) |
| Thermal correction to Energy                | 0.543408                    |
| Thermal correction to Enthalpy              | 0.544352                    |
| Thermal correction to Gibbs Free Energy     | 0.447967                    |
| Sum of electronic and zero-point Energies   | -5063.686234                |
| Sum of electronic and thermal Energies      | -5063.655649                |
| Sum of electronic and thermal Enthalpies    | -5063.654705                |
| Sum of electronic and thermal Free Energies | -5063.751090                |

### cartesian

|   |            |             |             |    |             |             |             |
|---|------------|-------------|-------------|----|-------------|-------------|-------------|
| 6 | 3.30522704 | -2.38622546 | -0.42100850 | 1  | 0.51762718  | 0.02107456  | -4.06690836 |
| 6 | 4.38762712 | -1.64132535 | 0.11169152  | 1  | 0.10972717  | 1.27077460  | -2.88340855 |
| 6 | 4.13512707 | -1.43922544 | 1.49589145  | 13 | -1.95447278 | -0.04112544 | 0.65519154  |
| 6 | 2.88222718 | -2.01192546 | 1.80409145  | 6  | -3.31437278 | -1.37552536 | 1.00149155  |
| 6 | 2.36642718 | -2.60022545 | 0.61239153  | 6  | -1.83767295 | 1.62387455  | -0.34270850 |
| 1 | 1.42582726 | -3.13142538 | 0.52459157  | 1  | -4.22407293 | -1.10472536 | 0.44689155  |
| 1 | 3.21162724 | -2.72172546 | -1.44530845 | 6  | -2.81967282 | -2.76172543 | 0.52909154  |
| 1 | 5.26572704 | -1.31682539 | -0.43350849 | 1  | -3.59757280 | -1.41172540 | 2.06019163  |

|    |             |             |             |   |             |             |             |
|----|-------------|-------------|-------------|---|-------------|-------------|-------------|
| 1  | 4.78782701  | -0.93272543 | 2.19539165  | 6 | -2.83727288 | 2.64107466  | 0.25809154  |
| 1  | 2.40372729  | -2.01532555 | 2.77579141  | 1 | -0.82017285 | 2.03837466  | -0.28220847 |
| 6  | 2.09542727  | 2.39847469  | -0.02970847 | 1 | -2.04987288 | 1.47427464  | -1.40880847 |
| 6  | 3.48022723  | 2.12857461  | -0.20720848 | 6 | -2.25087285 | -2.67572546 | -0.89210856 |
| 6  | 3.98942709  | 1.64867461  | 1.02009153  | 6 | -3.94197273 | -3.80012536 | 0.59449148  |
| 6  | 2.92142701  | 1.62017465  | 1.96529150  | 1 | -2.01377296 | -3.08642530 | 1.19929147  |
| 6  | 1.76432729  | 2.11197472  | 1.31639147  | 6 | -2.70617294 | 4.00647449  | -0.41940847 |
| 1  | 0.78702718  | 2.21857452  | 1.77059150  | 6 | -2.63407278 | 2.76907468  | 1.77109146  |
| 1  | 1.42412710  | 2.78857470  | -0.78630853 | 1 | -3.85487270 | 2.26987457  | 0.08179152  |
| 1  | 4.04752731  | 2.27387452  | -1.11660850 | 1 | -3.43557310 | 4.71857452  | -0.02350849 |
| 1  | 5.01972723  | 1.37807465  | 1.21229148  | 1 | -2.86107278 | 3.92707467  | -1.49860847 |
| 1  | 2.98972702  | 1.31557465  | 3.00249147  | 1 | -1.70557284 | 4.42027473  | -0.24960849 |
| 40 | 2.40142727  | -0.10842544 | 0.25269154  | 1 | -1.93617296 | -3.65332532 | -1.26840854 |
| 17 | -0.03487283 | -0.61232543 | 1.62549150  | 1 | -1.35787272 | -2.02622557 | -0.94250846 |
| 1  | 0.51012719  | -0.32752544 | -1.04740846 | 1 | -2.99597287 | -2.27372551 | -1.58870852 |
| 6  | 2.47012711  | -0.02462544 | -2.01100850 | 1 | -3.58407307 | -4.79112530 | 0.30039153  |
| 6  | 1.02682722  | -0.51002544 | -2.03690839 | 1 | -4.75937271 | -3.52152538 | -0.07890847 |
| 6  | 0.12772718  | 0.19177458  | -3.06110859 | 1 | -4.34967279 | -3.87252545 | 1.60579145  |
| 1  | 0.97252715  | -1.59622538 | -2.15890861 | 1 | -3.32417297 | 3.49077463  | 2.21559167  |
| 1  | 3.14532709  | -0.68692547 | -2.55030847 | 1 | -1.61447287 | 3.10187459  | 1.99869144  |
| 1  | 2.54652715  | 0.97867459  | -2.43190861 | 1 | -2.80367279 | 1.81717455  | 2.30149150  |
| 1  | -0.89887279 | -0.18502544 | -3.02170849 |   |             |             |             |

### I-2Cl\_bo

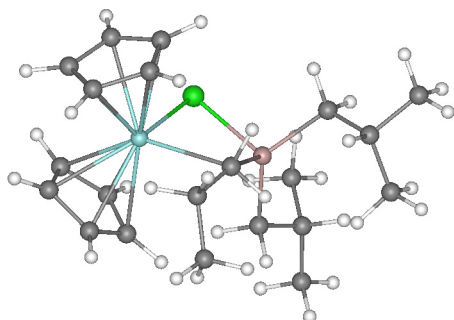

|                                           |                             |
|-------------------------------------------|-----------------------------|
| Zero-point vibrational energy             | 1352452.8 (Joules/Mol)      |
|                                           | 323.24398 (Kcal/Mol)        |
| Zero-point correction                     | 0.515122 (Hartree/Particle) |
| Thermal correction to Energy              | 0.544525                    |
| Thermal correction to Enthalpy            | 0.545469                    |
| Thermal correction to Gibbs Free Energy   | 0.456382                    |
| Sum of electronic and zero-point Energies | -5063.694252                |
| Sum of electronic and thermal Energies    | -5063.664850                |
| Sum of electronic and thermal Enthalpies  | -5063.663906                |

cartesian

|    |             |             |             |    |             |             |             |
|----|-------------|-------------|-------------|----|-------------|-------------|-------------|
| 6  | -3.17361522 | 2.33361530  | 0.42350847  | 1  | -5.26801491 | -0.01598477 | 1.55290842  |
| 6  | -4.29541540 | 1.48011518  | 0.20600849  | 1  | -1.81921506 | 0.27441522  | -3.98609138 |
| 6  | -4.48141527 | 0.70811522  | 1.38380849  | 13 | 0.93698484  | -0.00478477 | 0.60560846  |
| 6  | -3.45001507 | 1.03361523  | 2.29050851  | 6  | 1.95848489  | 1.58131528  | 1.11830842  |
| 6  | -2.64431524 | 2.04931521  | 1.69560850  | 6  | 1.59038496  | -1.70478475 | -0.11519152 |
| 1  | -1.76971507 | 2.50421524  | 2.14450860  | 1  | 2.75758481  | 1.25531518  | 1.80290842  |
| 1  | -2.78781509 | 3.06431532  | -0.27669153 | 6  | 2.60808492  | 2.38681531  | -0.02639151 |
| 1  | -4.93441534 | 1.47551525  | -0.66909146 | 1  | 1.32208490  | 2.24421525  | 1.72340846  |
| 1  | -3.30031514 | 0.60161525  | 3.27240849  | 6  | 2.96218491  | -2.08068466 | 0.48990849  |
| 6  | -1.74521518 | -2.20498466 | -0.87349153 | 1  | 0.89878482  | -2.53488469 | 0.09340848  |
| 6  | -2.98171520 | -1.76318479 | -1.42659152 | 1  | 1.67818499  | -1.65298474 | -1.21199155 |
| 6  | -3.96151519 | -1.80648482 | -0.41019151 | 6  | 3.52668476  | 1.50441527  | -0.87629151 |
| 6  | -3.33811522 | -2.28408480 | 0.77890849  | 6  | 3.38748503  | 3.58691525  | 0.51960850  |
| 6  | -1.98181510 | -2.55548477 | 0.47730848  | 1  | 1.81718493  | 2.78011513  | -0.68149149 |
| 1  | -1.24481511 | -2.93318486 | 1.17410851  | 6  | 3.50548506  | -3.36868477 | -0.13299152 |
| 1  | -0.80741519 | -2.32188487 | -1.40129149 | 6  | 2.85758495  | -2.22428489 | 2.01100850  |
| 1  | -3.14931512 | -1.46648479 | -2.45549154 | 1  | 3.67498493  | -1.27428472 | 0.27260849  |
| 1  | -3.82221508 | -2.45148468 | 1.73360848  | 1  | 4.49028492  | -3.62178469 | 0.27050850  |
| 40 | -2.33271527 | -0.05058476 | 0.31790850  | 1  | 3.59878492  | -3.27418470 | -1.21869159 |
| 17 | -0.58261514 | -0.40178478 | 2.28170848  | 1  | 2.83098483  | -4.20658493 | 0.07660848  |
| 6  | -1.03671515 | 0.31511524  | -3.22489142 | 1  | 4.00218487  | 2.07671523  | -1.67799151 |
| 6  | -0.48901516 | 1.03431523  | -0.81779158 | 1  | 2.99058485  | 0.66721523  | -1.34489155 |
| 6  | -1.49971509 | 1.07491529  | -1.98259151 | 1  | 4.32258511  | 1.07671523  | -0.25609151 |
| 1  | -1.72741508 | 2.11321521  | -2.23799133 | 1  | 3.81898499  | 4.18501520  | -0.28879151 |
| 1  | -0.37501517 | 2.03651524  | -0.39369151 | 1  | 4.20698500  | 3.24571514  | 1.16100848  |
| 1  | 0.46718484  | 0.81821525  | -1.32159150 | 1  | 2.74398494  | 4.23771524  | 1.11860847  |
| 1  | -2.52991509 | 0.68631524  | -1.74419153 | 1  | 3.81318474  | -2.52228475 | 2.45100856  |
| 1  | -0.73261517 | -0.70578480 | -2.98159146 | 1  | 2.11608481  | -2.98838472 | 2.27390862  |
| 1  | -0.17241517 | 0.82281524  | -3.65989137 | 1  | 2.55658484  | -1.28808475 | 2.49980855  |
| 1  | -5.00601530 | -1.54638481 | -0.52709150 |    |             |             |             |

# I-4Cl\_a

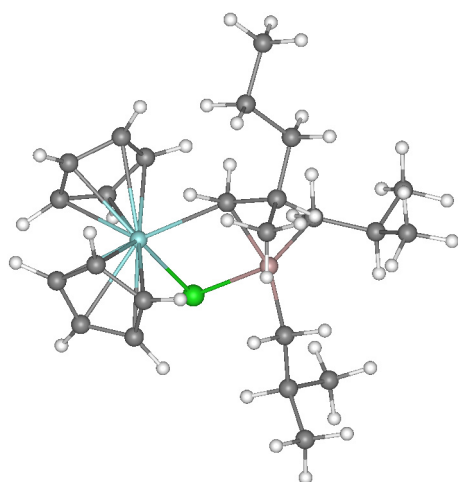

|                                             |                             |
|---------------------------------------------|-----------------------------|
| Zero-point vibrational energy               | 1575613.1 (Joules/Mol)      |
|                                             | 376.58058 (Kcal/Mol)        |
| Zero-point correction                       | 0.600119 (Hartree/Particle) |
| Thermal correction to Energy                | 0.633129                    |
| Thermal correction to Enthalpy              | 0.634073                    |
| Thermal correction to Gibbs Free Energy     | 0.535962                    |
| Sum of electronic and zero-point Energies   | -5181.495563                |
| Sum of electronic and thermal Energies      | -5181.462553                |
| Sum of electronic and thermal Enthalpies    | -5181.461609                |
| Sum of electronic and thermal Free Energies | -5181.559720                |

|    |            |             |             | cartesian |             |             |             |  |
|----|------------|-------------|-------------|-----------|-------------|-------------|-------------|--|
| 6  | 3.32843232 | -2.84297204 | 0.51105881  | 6         | 0.96963227  | 3.73372769  | 1.25485873  |  |
| 6  | 2.10603237 | -2.62567210 | 1.20745873  | 6         | 0.91613233  | 5.23652840  | 0.97635877  |  |
| 6  | 2.22683239 | -1.42707205 | 1.93865883  | 1         | 1.78653240  | 3.28922796  | 0.66965878  |  |
| 6  | 3.52733231 | -0.89037204 | 1.69945884  | 1         | 1.21513224  | 3.56842804  | 2.30955887  |  |
| 6  | 4.21413231 | -1.78757203 | 0.84425879  | 1         | 1.86133218  | 5.72282839  | 1.22675884  |  |
| 40 | 2.36283231 | -0.77877206 | -0.49574119 | 1         | 0.12863231  | 5.71252823  | 1.56675875  |  |
| 6  | 0.62873226 | 0.82742798  | 0.12955879  | 1         | 0.70393229  | 5.43182802  | -0.07864121 |  |
| 17 | 0.56383228 | -2.22937202 | -1.59724116 | 13        | -0.83526772 | -0.69117200 | -0.39614120 |  |
| 6  | 2.40373230 | 0.56382799  | -2.62994099 | 6         | -1.41436768 | -1.80257213 | 1.11955881  |  |
| 6  | 3.02293229 | -0.67597204 | -2.93104100 | 6         | -1.78886771 | 0.26942798  | -1.82454121 |  |
| 6  | 4.21143246 | -0.77387202 | -2.16984105 | 1         | -2.24476767 | -1.29207206 | 1.63335884  |  |
| 6  | 4.34313250 | 0.42372796  | -1.40724123 | 6         | -1.89196777 | -3.21907210 | 0.73405880  |  |
| 6  | 3.23273230 | 1.25072789  | -1.70634127 | 1         | -0.62896770 | -1.89277208 | 1.88335884  |  |
| 1  | 1.46993232 | -0.99077201 | 2.57615900  | 6         | -3.33126783 | 0.25802794  | -1.81534123 |  |
| 1  | 3.93643212 | 0.01352796  | 2.13665891  | 1         | -1.46566772 | 1.32412791  | -1.80684125 |  |
| 1  | 1.22903228 | -3.26017213 | 1.15945876  | 1         | -1.43306780 | -0.12397204 | -2.78824115 |  |
| 1  | 3.55153227 | -3.68607211 | -0.13264120 | 6         | -2.95606780 | -3.16267204 | -0.36424118 |  |

|   |             |             |             |   |             |             |             |
|---|-------------|-------------|-------------|---|-------------|-------------|-------------|
| 1 | 5.23453236  | -1.68197203 | 0.49875879  | 6 | -2.42096782 | -3.97227216 | 1.95745885  |
| 1 | 4.90993214  | -1.60157204 | -2.18574119 | 1 | -1.03596783 | -3.78207207 | 0.33615881  |
| 1 | 2.63393211  | -1.42827213 | -3.60524106 | 6 | -3.88536787 | 1.03432798  | -3.01344109 |
| 1 | 1.46923232  | 0.92192793  | -3.04624104 | 6 | -3.88226795 | 0.83872795  | -0.51074117 |
| 1 | 3.04603219  | 2.23302794  | -1.28764117 | 1 | -3.67806768 | -0.77847207 | -1.89924121 |
| 1 | 5.16383219  | 0.67612791  | -0.74724120 | 1 | -4.97866774 | 1.00072789  | -3.03864121 |
| 1 | 1.61313224  | 0.99322796  | 0.64585876  | 1 | -3.51276779 | 0.62532794  | -3.95684099 |
| 1 | 0.66453230  | 1.47052789  | -0.75614125 | 1 | -3.58256769 | 2.08632803  | -2.95924115 |
| 6 | -0.37126774 | 1.52012789  | 1.11965883  | 1 | -3.35166788 | -4.15687180 | -0.59054118 |
| 6 | -0.35336769 | 3.04662800  | 0.91395879  | 1 | -2.55606771 | -2.75367212 | -1.30154121 |
| 6 | -0.12716770 | 1.13942790  | 2.58115888  | 1 | -3.79686785 | -2.53107214 | -0.05174120 |
| 1 | -1.40356779 | 1.21792793  | 0.88025880  | 1 | -2.71086788 | -4.99547195 | 1.70085883  |
| 1 | -0.75596768 | 1.75032783  | 3.23485899  | 1 | -3.30196786 | -3.46547198 | 2.36615896  |
| 1 | 0.91463232  | 1.31372797  | 2.87325883  | 1 | -1.66766787 | -4.02257204 | 2.75005889  |
| 1 | -0.37796772 | 0.09472796  | 2.77725887  | 1 | -4.97526789 | 0.87732792  | -0.52084118 |
| 1 | -1.14796782 | 3.48202801  | 1.53225875  | 1 | -3.51786757 | 1.86392784  | -0.36424118 |
| 1 | -0.62096769 | 3.26682782  | -0.12784120 | 1 | -3.58676767 | 0.24352798  | 0.36215878  |

#### I-4Cl\_bi

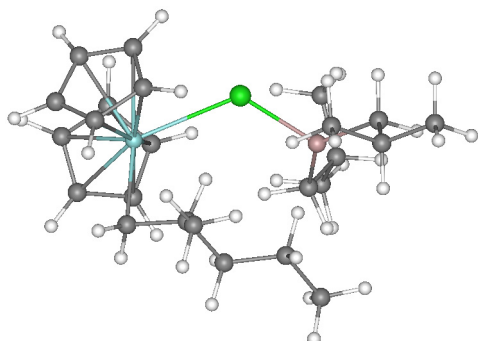

|                                             |                             |
|---------------------------------------------|-----------------------------|
| Zero-point vibrational energy               | 1571825.7 (Joules/Mol)      |
|                                             | 375.67536 (Kcal/Mol)        |
| Zero-point correction                       | 0.598677 (Hartree/Particle) |
| Thermal correction to Energy                | 0.633010                    |
| Thermal correction to Enthalpy              | 0.633954                    |
| Thermal correction to Gibbs Free Energy     | 0.530101                    |
| Sum of electronic and zero-point Energies   | -5181.490555                |
| Sum of electronic and thermal Energies      | -5181.456222                |
| Sum of electronic and thermal Enthalpies    | -5181.455278                |
| Sum of electronic and thermal Free Energies | -5181.559131                |

cartesian

|   |             |            |            |   |            |             |             |
|---|-------------|------------|------------|---|------------|-------------|-------------|
| 6 | -3.87484121 | 1.96721029 | 0.72251761 | 6 | 1.99545884 | -2.08998966 | -0.41958237 |
|---|-------------|------------|------------|---|------------|-------------|-------------|

|    |             |             |             |   |             |             |             |
|----|-------------|-------------|-------------|---|-------------|-------------|-------------|
| 6  | -4.74384117 | 0.88931030  | 1.01711762  | 1 | 4.14845896  | 0.31941026  | 1.32691765  |
| 6  | -4.22964144 | 0.21281029  | 2.15951777  | 6 | 3.10615897  | 2.19811034  | 0.99951762  |
| 6  | -3.02954102 | 0.84621024  | 2.53921771  | 1 | 2.99005890  | 0.72491026  | 2.57971764  |
| 6  | -2.79644108 | 1.92691040  | 1.63951766  | 6 | 2.71475887  | -3.22388959 | 0.35441762  |
| 1  | -1.95894122 | 2.61481023  | 1.68011761  | 1 | 0.99335879  | -2.43038964 | -0.71858239 |
| 1  | -4.02764130 | 2.69491029  | -0.06118236 | 1 | 2.53715897  | -1.88198972 | -1.34948242 |
| 1  | -5.66034126 | 0.65291029  | 0.49081761  | 6 | 4.23205900  | 3.00521040  | 1.65301764  |
| 1  | -4.68064117 | -0.63998973 | 2.65081763  | 6 | 1.75425887  | 2.85901022  | 1.28571761  |
| 1  | -2.39054108 | 0.55781025  | 3.36471772  | 1 | 3.27395892  | 2.21251035  | -0.08608235 |
| 6  | -2.20364118 | -2.24978971 | -1.16318238 | 6 | 2.59215879  | -4.55538988 | -0.38878238 |
| 6  | -3.59874105 | -1.97068965 | -1.20618236 | 6 | 2.17955899  | -3.35318971 | 1.78471756  |
| 6  | -4.11924124 | -2.16398978 | 0.09321763  | 1 | 3.77905893  | -2.96628976 | 0.41771764  |
| 6  | -3.04744101 | -2.55168962 | 0.94911760  | 1 | 3.14835882  | -5.34818983 | 0.11951763  |
| 6  | -1.87724113 | -2.63348961 | 0.15701763  | 1 | 2.97415900  | -4.47299004 | -1.40968239 |
| 1  | -0.89634115 | -2.91538978 | 0.51761764  | 1 | 1.54175901  | -4.86379004 | -0.44478238 |
| 1  | -1.52394116 | -2.21398973 | -2.00598216 | 1 | 4.24365902  | 4.03591013  | 1.28681767  |
| 1  | -4.16454124 | -1.67508972 | -2.07968235 | 1 | 5.20925903  | 2.56071043  | 1.44651759  |
| 1  | -5.15634108 | -2.05308962 | 0.38301763  | 1 | 4.09745884  | 3.03381038  | 2.73941779  |
| 1  | -3.11984110 | -2.79178977 | 2.00251770  | 1 | 1.75685883  | 3.90721011  | 0.97141761  |
| 40 | -2.60894108 | -0.18618971 | 0.28241763  | 1 | 1.53305888  | 2.83091044  | 2.35901785  |
| 17 | -0.15214115 | -0.28928971 | 1.64891768  | 1 | 0.92405885  | 2.36011028  | 0.76751763  |
| 1  | -0.92584115 | 1.21361029  | -0.41558236 | 1 | 2.65525889  | -4.17809010 | 2.32181764  |
| 6  | -2.64974117 | 0.84571028  | -1.74148238 | 1 | 1.09825873  | -3.53508973 | 1.78811765  |
| 6  | -1.27824116 | 1.46231031  | -1.46278238 | 1 | 2.36775899  | -2.44948959 | 2.38761783  |
| 6  | -0.18804115 | 0.87901026  | -2.37768221 | 1 | -1.48144114 | 3.33961034  | -2.50728226 |
| 6  | -1.29834116 | 2.99641037  | -1.48438239 | 1 | -0.35654116 | 3.42861032  | -1.13648236 |
| 1  | -3.41494107 | 1.59441030  | -1.94478238 | 1 | -2.09474111 | 3.39381027  | -0.85128236 |
| 1  | -2.60854101 | 0.15131028  | -2.58218217 | 6 | 2.28395891  | 0.65681028  | -2.93998218 |
| 6  | 1.24015880  | 1.27321029  | -2.01258230 | 1 | 1.43325901  | 0.97031027  | -0.96458232 |
| 1  | -0.40024114 | 1.19721031  | -3.40638232 | 1 | 1.35745883  | 2.36161041  | -1.99698246 |
| 1  | -0.26114115 | -0.21728972 | -2.37518215 | 1 | 3.30035901  | 0.85301030  | -2.58838224 |
| 13 | 1.87245893  | -0.51458973 | 0.71301764  | 1 | 2.19115901  | 1.08071029  | -3.94338226 |
| 6  | 3.14295888  | 0.73171026  | 1.48971760  | 1 | 2.15045881  | -0.42498970 | -3.02588224 |

# I-4Cl\_bo

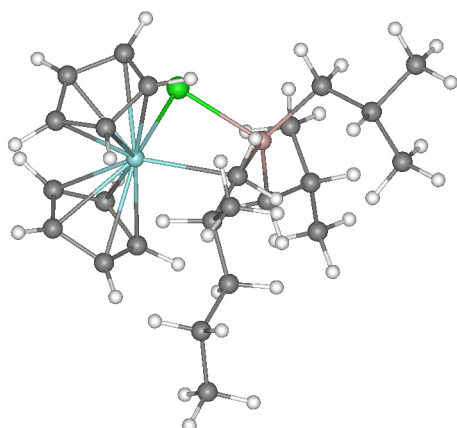

|                                             |                             |
|---------------------------------------------|-----------------------------|
| Zero-point vibrational energy               | 1577004.0 (Joules/Mol)      |
|                                             | 376.91300 (Kcal/Mol)        |
| Zero-point correction                       | 0.600649 (Hartree/Particle) |
| Thermal correction to Energy                | 0.634267                    |
| Thermal correction to Enthalpy              | 0.635211                    |
| Thermal correction to Gibbs Free Energy     | 0.535875                    |
| Sum of electronic and zero-point Energies   | -5181.496412                |
| Sum of electronic and thermal Energies      | -5181.462794                |
| Sum of electronic and thermal Enthalpies    | -5181.461850                |
| Sum of electronic and thermal Free Energies | -5181.561186                |

|   |            |             |             | cartesian |             |             |             |
|---|------------|-------------|-------------|-----------|-------------|-------------|-------------|
| 6 | 2.40123534 | -1.30292070 | -2.57488370 | 1         | 2.73113537  | 2.70547938  | -1.91708374 |
| 6 | 3.59213543 | -0.84212065 | -1.93868375 | 1         | 1.00143540  | 2.75747943  | -2.30178380 |
| 6 | 4.10023546 | -1.90062070 | -1.14988375 | 1         | 1.97873545  | 1.38247931  | -2.81768370 |
| 6 | 3.21613550 | -3.00622058 | -1.27278376 | 1         | 0.89123535  | 1.92807937  | 1.33911622  |
| 6 | 2.18913531 | -2.63952065 | -2.18038368 | 1         | 0.32313538  | 3.03647923  | 0.11121619  |
| 1 | 1.36463547 | -3.26732063 | -2.48978376 | 1         | 4.64543533  | -1.01242065 | 1.59521627  |
| 1 | 1.79133534 | -0.75262070 | -3.27878380 | 1         | 5.01643562  | -1.88062072 | -0.57548380 |
| 1 | 4.05103540 | 0.13167930  | -2.06678367 | 13        | -1.36046457 | -0.95142066 | -0.15488382 |
| 1 | 3.33423543 | -3.97652078 | -0.80588382 | 6         | -2.39816451 | -0.91972065 | -1.81258380 |
| 6 | 1.41543531 | -0.52532071 | 2.30001616  | 6         | -1.96446466 | -0.58292067 | 1.67241621  |
| 6 | 2.70593548 | -0.00492066 | 2.00591636  | 1         | -3.31146455 | -1.51272070 | -1.64598370 |
| 6 | 3.58593535 | -1.09032071 | 1.79891622  | 6         | -2.82036448 | 0.46797931  | -2.33798385 |
| 6 | 2.84483552 | -2.29422069 | 1.97851634  | 1         | -1.84816456 | -1.46112061 | -2.59678364 |
| 6 | 1.51763535 | -1.93862069 | 2.31441617  | 6         | -3.43736458 | -1.00602067 | 1.87411630  |
| 1 | 0.71123540 | -2.63142061 | 2.51591635  | 1         | -1.36056471 | -1.12922072 | 2.41301632  |
| 1 | 0.52923536 | 0.04837930  | 2.54001617  | 1         | -1.85686445 | 0.48497933  | 1.92001629  |
| 1 | 2.97763538 | 1.04317927  | 1.96761620  | 6         | -3.60446453 | 1.24897933  | -1.27928376 |
| 1 | 3.23753548 | -3.30162072 | 1.91591620  | 6         | -3.64866447 | 0.34357929  | -3.62038374 |

|    |             |             |             |   |             |             |             |
|----|-------------|-------------|-------------|---|-------------|-------------|-------------|
| 40 | 1.92933536  | -1.20922065 | -0.08418381 | 1 | -1.91856456 | 1.04667926  | -2.58528376 |
| 17 | -0.13566458 | -2.89152074 | -0.14308381 | 6 | -3.92786455 | -0.64552069 | 3.27841616  |
| 1  | 2.47853541  | 4.10077953  | -0.10858381 | 6 | -3.60916471 | -2.50622082 | 1.61801624  |
| 6  | 1.19403541  | 2.44487929  | 0.42121619  | 1 | -4.06086445 | -0.46382070 | 1.15081620  |
| 6  | 2.36123538  | 3.39117932  | 0.71581620  | 1 | -4.98046446 | -0.91102070 | 3.41371632  |
| 6  | 2.15233541  | 4.16107941  | 2.01981616  | 1 | -3.82176447 | 0.42597932  | 3.47111630  |
| 1  | 3.30443549  | 2.82877922  | 0.76351619  | 1 | -3.34576464 | -1.18392062 | 4.03481627  |
| 1  | 2.96783543  | 4.86357975  | 2.20071626  | 1 | -3.91396475 | 2.22967935  | -1.65208375 |
| 1  | 2.09643531  | 3.48147941  | 2.87641621  | 1 | -3.02256465 | 1.41517937  | -0.36148381 |
| 1  | 1.22003531  | 4.73157978  | 1.98861623  | 1 | -4.50976467 | 0.70017934  | -0.99648380 |
| 6  | 0.29473537  | 0.42367929  | -0.84828383 | 1 | -3.92096472 | 1.32637930  | -4.01738405 |
| 6  | 1.46743536  | 1.41307926  | -0.68518382 | 1 | -4.57396460 | -0.20722067 | -3.42088366 |
| 6  | 1.82613540  | 2.09997940  | -2.00918388 | 1 | -3.09916449 | -0.19652069 | -4.39658356 |
| 1  | 0.10163540  | 0.26557934  | -1.91368377 | 1 | -4.64016438 | -2.82512069 | 1.79511631  |
| 1  | -0.57116467 | 0.99887931  | -0.47698382 | 1 | -2.96106458 | -3.08692074 | 2.28511620  |
| 1  | 2.43613529  | 0.91697931  | -0.36478382 | 1 | -3.35946465 | -2.78682065 | 0.58631617  |

#### TS-4Cl

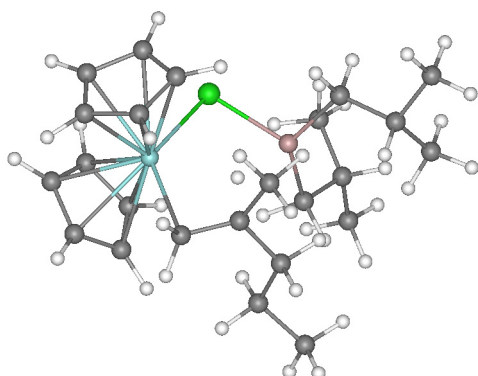

|                                             |                             |
|---------------------------------------------|-----------------------------|
| Zero-point vibrational energy               | 1565700.3 (Joules/Mol)      |
|                                             | 374.21135 (Kcal/Mol)        |
| Zero-point correction                       | 0.596344 (Hartree/Particle) |
| Thermal correction to Energy                | 0.629335                    |
| Thermal correction to Enthalpy              | 0.630279                    |
| Thermal correction to Gibbs Free Energy     | 0.533415                    |
| Sum of electronic and zero-point Energies   | -5181.470810                |
| Sum of electronic and thermal Energies      | -5181.437819                |
| Sum of electronic and thermal Enthalpies    | -5181.436874                |
| Sum of electronic and thermal Free Energies | -5181.533738                |

| cartesian |             |             |             |   |            |             |            |
|-----------|-------------|-------------|-------------|---|------------|-------------|------------|
| 6         | -2.60541773 | -2.37368989 | -0.70739561 | 6 | 1.80268228 | -1.57938969 | 0.44980437 |
| 6         | -3.93871784 | -1.87228978 | -0.68539560 | 1 | 2.05448198 | 1.89421022  | 2.15620446 |

|    |             |             |             |   |             |             |             |
|----|-------------|-------------|-------------|---|-------------|-------------|-------------|
| 6  | -4.34391785 | -1.79048967 | 0.66650438  | 6 | 2.66368198  | 2.45941019  | 0.16990438  |
| 6  | -3.24841785 | -2.16718984 | 1.48200440  | 1 | 0.77038217  | 2.63131022  | 1.24750447  |
| 6  | -2.18081784 | -2.55418992 | 0.62110436  | 6 | 2.98738241  | -1.88628972 | 1.39850450  |
| 1  | -1.21131778 | -2.91308975 | 0.94320440  | 1 | 1.08358216  | -2.40968990 | 0.52000439  |
| 1  | -2.02871776 | -2.59518981 | -1.59419560 | 1 | 2.16698217  | -1.58378971 | -0.58489561 |
| 1  | -4.55011797 | -1.64398968 | -1.54979563 | 6 | 3.84888220  | 1.49991024  | 0.04010439  |
| 1  | -5.31981802 | -1.47888970 | 1.01490438  | 6 | 3.14448214  | 3.84551024  | 0.60890436  |
| 1  | -3.23331785 | -2.19878983 | 2.56450438  | 1 | 2.21928215  | 2.56541014  | -0.82909566 |
| 6  | -3.62571764 | 2.23471022  | 0.05710438  | 6 | 3.56948185  | -3.26908994 | 1.09330440  |
| 6  | -4.61051798 | 1.35161030  | 0.55240440  | 6 | 2.57728243  | -1.78968978 | 2.87080431  |
| 6  | -4.25321770 | 1.01221025  | 1.89250445  | 1 | 3.77428198  | -1.14398968 | 1.21920443  |
| 6  | -3.04761791 | 1.66941023  | 2.20030427  | 1 | 4.44438219  | -3.47858977 | 1.71570444  |
| 6  | -2.63001776 | 2.39921021  | 1.05470443  | 1 | 3.87278223  | -3.34698987 | 0.04520439  |
| 1  | -1.75021780 | 3.02841020  | 0.99450439  | 1 | 2.82368231  | -4.04788971 | 1.28780437  |
| 1  | -3.65501785 | 2.71971011  | -0.90839559 | 1 | 4.62688208  | 1.91911030  | -0.60419559 |
| 1  | -5.50541782 | 1.03981030  | 0.02790439  | 1 | 3.55218220  | 0.53511024  | -0.38969558 |
| 1  | -4.81981802 | 0.38391024  | 2.56760430  | 1 | 4.29798222  | 1.30851030  | 1.02190447  |
| 1  | -2.51691771 | 1.61141026  | 3.14060426  | 1 | 3.86868191  | 4.25801039  | -0.09939560 |
| 40 | -2.54501772 | -0.05028976 | 0.37360439  | 1 | 3.62828207  | 3.78561020  | 1.58980441  |
| 17 | -0.69881779 | -0.33408976 | 2.41840434  | 1 | 2.31008244  | 4.54861021  | 0.69010437  |
| 1  | -0.61541778 | 0.39741024  | -0.31179559 | 1 | 3.40048218  | -2.07788992 | 3.53010440  |
| 6  | -2.26191783 | 0.42491025  | -2.02789569 | 1 | 1.72838223  | -2.44958973 | 3.08510423  |
| 6  | -0.93141782 | 0.86101019  | -1.80829573 | 1 | 2.28548241  | -0.76958978 | 3.15740442  |
| 6  | 0.25138217  | 0.13351025  | -2.43409562 | 1 | 0.15498221  | 2.57581019  | -1.01329565 |
| 1  | -2.39941788 | -0.49928975 | -2.57869577 | 1 | -1.55671787 | 2.90541005  | -1.35639572 |
| 1  | -2.99931765 | 1.19011033  | -2.24869561 | 1 | -0.41001779 | 2.71431017  | -2.67929578 |
| 1  | 0.33468223  | 0.58051026  | -3.43519568 | 6 | 1.42718232  | -1.91928971 | -3.29779577 |
| 1  | 1.17538226  | 0.42291024  | -1.91249561 | 1 | -0.69881779 | -1.65928972 | -3.16699576 |
| 6  | 0.18568218  | -1.38098967 | -2.58389568 | 1 | 0.08898222  | -1.84698975 | -1.59659553 |
| 6  | -0.67811781 | 2.35171008  | -1.68079567 | 1 | 1.40388215  | -3.00898981 | -3.35809565 |
| 13 | 0.91158223  | 0.10061024  | 0.91600436  | 1 | 2.34398222  | -1.63088977 | -2.77559566 |
| 6  | 1.60118210  | 1.91751027  | 1.14950442  | 1 | 1.48898208  | -1.52648973 | -4.31639576 |

## I-5Cl

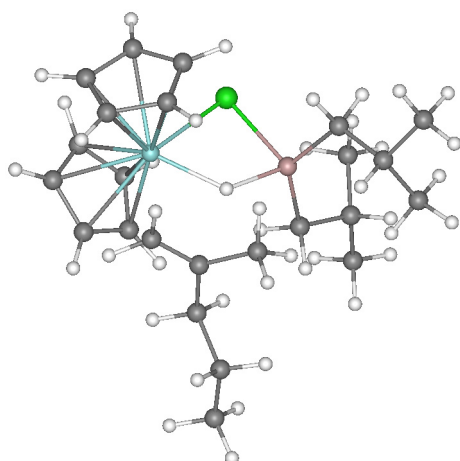

|                                             |                             |
|---------------------------------------------|-----------------------------|
| Zero-point vibrational energy               | 1567247.8 (Joules/Mol)      |
|                                             | 374.58121 (Kcal/Mol)        |
| Zero-point correction                       | 0.596933 (Hartree/Particle) |
| Thermal correction to Energy                | 0.631370                    |
| Thermal correction to Enthalpy              | 0.632314                    |
| Thermal correction to Gibbs Free Energy     | 0.529704                    |
| Sum of electronic and zero-point Energies   | -5181.483996                |
| Sum of electronic and thermal Energies      | -5181.449559                |
| Sum of electronic and thermal Enthalpies    | -5181.448615                |
| Sum of electronic and thermal Free Energies | -5181.551225                |

| cartesian |            |             |             |   |             |            |             |  |  |
|-----------|------------|-------------|-------------|---|-------------|------------|-------------|--|--|
| 6         | 3.29454541 | 1.48925149  | 1.28334713  | 6 | -0.08085442 | 1.01095152 | -2.36625290 |  |  |
| 6         | 4.23164558 | 0.46655157  | 1.53904712  | 6 | 0.63854557  | 2.72735167 | -0.62605286 |  |  |
| 6         | 3.62964559 | -0.46114841 | 2.44024706  | 1 | 3.14754558  | 1.87585163 | -1.40565288 |  |  |
| 6         | 2.33524561 | 0.01895159  | 2.75204706  | 1 | 2.56084561  | 0.63265157 | -2.64045286 |  |  |
| 6         | 2.10484552 | 1.20105159  | 2.00994730  | 1 | -1.00215435 | 0.93675160 | -1.77815282 |  |  |
| 1         | 1.20884562 | 1.80765152  | 2.04474711  | 1 | -0.29955447 | 1.66335154 | -3.21965265 |  |  |
| 1         | 3.47234559 | 2.36345148  | 0.67224717  | 1 | 0.17994556  | 0.02275157 | -2.75195265 |  |  |
| 1         | 5.24054527 | 0.42195156  | 1.14954710  | 6 | -0.05635446 | 3.88885164 | -1.36325288 |  |  |
| 1         | 4.09594584 | -1.34674847 | 2.85474730  | 1 | -0.05905443 | 2.32395148 | 0.12084714  |  |  |
| 1         | 1.62644553 | -0.45904842 | 3.41444731  | 1 | 1.51334548  | 3.11765146 | -0.09675285 |  |  |
| 6         | 2.70564556 | -1.91074848 | -1.87565291 | 6 | -0.37835449 | 5.03265142 | -0.40325284 |  |  |
| 6         | 3.96854544 | -1.35824847 | -1.49355292 | 1 | -0.97895449 | 3.52995157 | -1.82865298 |  |  |
| 6         | 4.39624548 | -2.03004837 | -0.32515287 | 1 | 0.59344554  | 4.24465132 | -2.16965294 |  |  |
| 6         | 3.38294554 | -2.94004846 | 0.05754714  | 1 | -0.88425440 | 5.84745169 | -0.92435288 |  |  |
| 6         | 2.35394549 | -2.88574839 | -0.92685282 | 1 | 0.53194559  | 5.43785143 | 0.04694714  |  |  |
| 1         | 1.44654560 | -3.47554851 | -0.91925287 | 1 | -1.03335452 | 4.69295168 | 0.40424713  |  |  |
| 1         | 2.12444568 | -1.64434850 | -2.74995279 | 6 | -3.54525471 | 0.75595152 | 3.35344696  |  |  |

---

|    |             |             |             |   |             |             |             |
|----|-------------|-------------|-------------|---|-------------|-------------|-------------|
| 1  | 4.53384542  | -0.61024845 | -2.03585291 | 6 | -2.79175448 | -1.61914849 | 3.00824690  |
| 1  | 5.32954550  | -1.86474848 | 0.19724713  | 1 | -3.82525444 | -0.40644842 | 1.57904708  |
| 1  | 3.39664555  | -3.59354854 | 0.92114711  | 6 | -3.13085461 | -2.84264851 | -2.89455271 |
| 40 | 2.36754560  | -0.66074842 | 0.30214715  | 1 | -2.07945442 | -0.99764836 | -2.66225290 |
| 17 | 0.61774558  | -2.29924846 | 1.62374711  | 6 | -3.76125431 | -0.97514844 | -1.33755291 |
| 1  | 0.50594556  | -0.23564842 | -0.14955285 | 1 | -4.47835445 | 0.42705157  | 3.82044697  |
| 13 | -0.91445440 | -1.06314838 | 0.43304715  | 1 | -3.72585440 | 1.72715163  | 2.88364697  |
| 6  | -1.59785461 | -2.25294828 | -0.96995282 | 1 | -2.80375457 | 0.89795160  | 4.14784718  |
| 6  | -1.76955462 | 0.24215159  | 1.62044716  | 1 | -3.66895437 | -1.95314848 | 3.56944704  |
| 6  | -2.59925461 | -1.71114850 | -2.00955296 | 1 | -1.95075440 | -1.55384851 | 3.70924711  |
| 1  | -0.75245446 | -2.72634840 | -1.49175286 | 1 | -2.55825448 | -2.40854836 | 2.28074694  |
| 1  | -2.08615446 | -3.08124852 | -0.42905289 | 1 | -4.50485468 | -0.64954841 | -2.07075310 |
| 6  | -3.04095459 | -0.26784843 | 2.33294725  | 1 | -3.42595434 | -0.08444841 | -0.79115289 |
| 1  | -1.03325438 | 0.52805161  | 2.39114714  | 1 | -4.26735449 | -1.63414848 | -0.62155288 |
| 1  | -2.00745440 | 1.17025161  | 1.07874715  | 1 | -3.81035471 | -2.46234846 | -3.66325283 |
| 6  | 2.32914567  | 1.28115153  | -1.80135286 | 1 | -3.68175459 | -3.57034850 | -2.28885269 |
| 6  | 1.03504562  | 1.62495160  | -1.56665289 | 1 | -2.31515455 | -3.37314844 | -3.39455271 |

---

### S3.8. <sup>i</sup>Bu<sub>2</sub>AlMe reaction profile

I-OMe

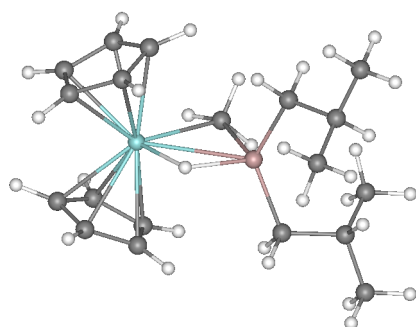

|                                             |                             |
|---------------------------------------------|-----------------------------|
| Zero-point vibrational energy               | 1209895.9 (Joules/Mol)      |
|                                             | 289.17207 (Kcal/Mol)        |
| Zero-point correction                       | 0.460825 (Hartree/Particle) |
| Thermal correction to Energy                | 0.486866                    |
| Thermal correction to Enthalpy              | 0.487810                    |
| Thermal correction to Gibbs Free Energy     | 0.403556                    |
| Sum of electronic and zero-point Energies   | -4525.543269                |
| Sum of electronic and thermal Energies      | -4525.517228                |
| Sum of electronic and thermal Enthalpies    | -4525.516284                |
| Sum of electronic and thermal Free Energies | -4525.600538                |

| cartesian |             |             |             |   |                                    |
|-----------|-------------|-------------|-------------|---|------------------------------------|
| 6         | -3.38580179 | 1.90520573  | 1.37410378  | 6 | 1.36719811 -1.69039428 -0.40929621 |
| 6         | -4.36060190 | 1.51810563  | 0.41930377  | 6 | 1.37989795 1.78040564 0.29200378   |
| 6         | -3.83450174 | 1.78890562  | -0.87529624 | 1 | 1.34979808 -1.84479427 -1.49849617 |
| 6         | -2.53860188 | 2.34410572  | -0.71509624 | 6 | 2.81989813 -1.81909430 0.09710379  |
| 6         | -2.25630188 | 2.40360570  | 0.67600381  | 1 | 0.77939808 -2.52229428 0.01380379  |
| 1         | -1.34530199 | 2.78450561  | 1.12200379  | 6 | 2.78319788 1.90980566 -0.33489621  |
| 1         | -3.48820210 | 1.83650565  | 2.45140386  | 1 | 0.73569798 2.55670571 -0.15349621  |
| 1         | -5.34420204 | 1.12150562  | 0.63930380  | 1 | 1.43349802 2.02680564 1.36330378   |
| 1         | -4.34590197 | 1.62600565  | -1.81639624 | 6 | 3.40479803 -3.19439435 -0.23449621 |
| 1         | -1.88060200 | 2.67150569  | -1.51019621 | 6 | 2.89839792 -1.55549431 1.60380375  |
| 6         | -4.24540186 | -1.57829428 | -0.71859622 | 1 | 3.43069792 -1.06309438 -0.41349620 |
| 6         | -3.24500179 | -1.55619431 | -1.72419620 | 6 | 3.35699797 3.31280565 -0.12039621  |
| 6         | -2.07340193 | -2.16479445 | -1.19279623 | 6 | 2.74289799 1.57240570 -1.82809615  |
| 6         | -2.34070206 | -2.53019428 | 0.14740379  | 1 | 3.45269823 1.19410563 0.16020378   |
| 6         | -3.68550205 | -2.16179442 | 0.44520378  | 1 | 4.36529827 3.39980578 -0.53549623  |
| 1         | -4.20330191 | -2.33609438 | 1.38190377  | 1 | 3.40619802 3.56160569 0.94340378   |
| 1         | -5.25910187 | -1.21149433 | -0.82199621 | 1 | 2.72529793 4.06090546 -0.61269623  |
| 1         | -3.36240196 | -1.17899430 | -2.73319602 | 1 | 4.44769812 -3.27159429 0.08680379  |
| 1         | -1.14140201 | -2.32269430 | -1.72089624 | 1 | 3.36639833 -3.39089441 -1.30939627 |

|    |             |             |             |   |            |             |             |
|----|-------------|-------------|-------------|---|------------|-------------|-------------|
| 1  | -1.65190196 | -3.02349424 | 0.82260376  | 1 | 2.83759785 | -3.98269439 | 0.27310380  |
| 40 | -2.44640207 | -0.03129431 | 0.08350379  | 1 | 3.91719818 | -1.67579436 | 1.98220384  |
| 6  | -0.80440199 | -0.23319432 | 1.79000378  | 1 | 2.26039791 | -2.26139426 | 2.15100384  |
| 1  | -0.88380194 | 0.23170570  | -1.00559616 | 1 | 2.58109808 | -0.53559434 | 1.86580384  |
| 1  | -0.15010196 | -1.05879438 | 2.10480380  | 1 | 3.72789812 | 1.67630565  | -2.29179621 |
| 1  | -1.77720201 | -0.55639434 | 2.23500395  | 1 | 2.05669785 | 2.24770570  | -2.35369611 |
| 1  | -0.52360195 | 0.65090567  | 2.37090397  | 1 | 2.40809822 | 0.54210567  | -2.01079607 |
| 13 | 0.53869808  | 0.02720569  | 0.04480379  |   |            |             |             |

### I-OMe\_a

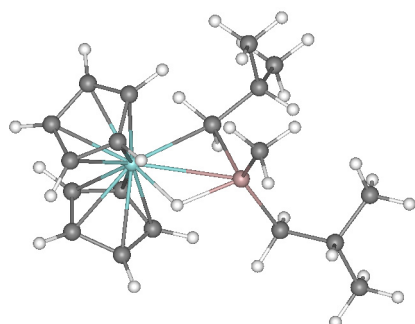

|                                             |                             |
|---------------------------------------------|-----------------------------|
| Zero-point vibrational energy               | 1212783.3 (Joules/Mol)      |
|                                             | 289.86216 (Kcal/Mol)        |
| Zero-point correction                       | 0.461925 (Hartree/Particle) |
| Thermal correction to Energy                | 0.487740                    |
| Thermal correction to Enthalpy              | 0.488684                    |
| Thermal correction to Gibbs Free Energy     | 0.406455                    |
| Sum of electronic and zero-point Energies   | -4525.542068                |
| Sum of electronic and thermal Energies      | -4525.516252                |
| Sum of electronic and thermal Enthalpies    | -4525.515308                |
| Sum of electronic and thermal Free Energies | -4525.597537                |

|   |            |             |             | cartesian |             |             |             |
|---|------------|-------------|-------------|-----------|-------------|-------------|-------------|
| 6 | 3.55746412 | 1.63991702  | 0.10151130  | 6         | -2.00773597 | -1.39618301 | 0.35551131  |
| 6 | 4.31506443 | 0.56221700  | 0.61941129  | 6         | -1.05133581 | 1.43671703  | 2.16981125  |
| 6 | 3.71206403 | 0.14921699  | 1.83881128  | 1         | -1.58143592 | -2.35128307 | 0.70151132  |
| 6 | 2.59846425 | 0.99461693  | 2.08751106  | 6         | -3.43903613 | -1.25858295 | 0.91631132  |
| 6 | 2.49266410 | 1.90681696  | 1.00921130  | 1         | -2.07713580 | -1.49178302 | -0.74118870 |
| 1 | 1.75886416 | 2.69551706  | 0.91021127  | 1         | -0.17153585 | 2.04201698  | 2.41371107  |
| 1 | 3.76956415 | 2.18541694  | -0.81138873 | 1         | -1.84583592 | 2.13361692  | 1.87921131  |
| 1 | 5.20396423 | 0.13511698  | 0.17201129  | 6         | -4.27533579 | -2.50038290 | 0.59591132  |
| 1 | 4.06576443 | -0.64028299 | 2.49071121  | 6         | -4.12413549 | -0.00438301 | 0.36811128  |
| 1 | 1.94936419 | 0.95111698  | 2.95281124  | 1         | -3.38163590 | -1.16308296 | 2.00871134  |
| 6 | 3.41796422 | -1.98158300 | -1.29168868 | 1         | -5.28363562 | -2.42048287 | 1.01271129  |

|    |             |             |             |   |             |             |             |
|----|-------------|-------------|-------------|---|-------------|-------------|-------------|
| 6  | 3.27526402  | -2.55648303 | 0.00201130  | 1 | -3.81363606 | -3.40558290 | 1.00051129  |
| 6  | 1.90906405  | -2.87718296 | 0.19241129  | 1 | -4.36863565 | -2.62568307 | -0.48878872 |
| 6  | 1.20276415  | -2.50598288 | -0.98518872 | 1 | -5.15593576 | 0.07371698  | 0.72171128  |
| 6  | 2.13576412  | -1.96648300 | -1.90238869 | 1 | -4.15063572 | -0.03118301 | -0.72848868 |
| 1  | 1.91316414  | -1.59938300 | -2.89798880 | 1 | -3.60803580 | 0.91331702  | 0.67481130  |
| 1  | 4.34496403  | -1.66068292 | -1.75098872 | 6 | -1.19593573 | 1.81111705  | -2.81128883 |
| 1  | 4.07506418  | -2.73318291 | 0.71021128  | 6 | -0.37943584 | 3.10141706  | -0.80548871 |
| 1  | 1.47606421  | -3.33708286 | 1.07171130  | 1 | -1.80923581 | 1.50601709  | -0.80248868 |
| 1  | 0.13876414  | -2.63228297 | -1.14848876 | 1 | -1.94023585 | 2.58771706  | -3.00488853 |
| 40 | 2.07086420  | -0.37298301 | 0.04341129  | 1 | -1.59623599 | 0.86021692  | -3.17318869 |
| 6  | 0.16666415  | 0.60741699  | -1.05608869 | 1 | -0.29843587 | 2.05081701  | -3.39168882 |
| 1  | 0.76936418  | -0.76498300 | 1.38291132  | 1 | -1.10773587 | 3.87971711  | -1.04658866 |
| 1  | -0.10373586 | -0.21618301 | -1.72648871 | 1 | 0.56706417  | 3.37591696  | -1.28728867 |
| 1  | 1.12566423  | 1.02931702  | -1.46528876 | 1 | -0.24083585 | 3.10911703  | 0.27771130  |
| 6  | -0.86313587 | 1.74531698  | -1.31648874 | 1 | -1.38483596 | 0.97651702  | 3.10871124  |
| 13 | -0.75623578 | 0.03341699  | 0.84401131  |   |             |             |             |

### I-OMe\_bo

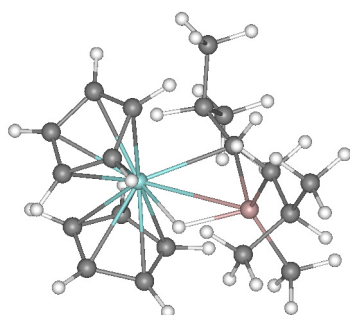

|                                             |                             |
|---------------------------------------------|-----------------------------|
| Zero-point vibrational energy               | 1212997.1 (Joules/Mol)      |
|                                             | 289.91326 (Kcal/Mol)        |
| Zero-point correction                       | 0.462006 (Hartree/Particle) |
| Thermal correction to Energy                | 0.487794                    |
| Thermal correction to Enthalpy              | 0.488738                    |
| Thermal correction to Gibbs Free Energy     | 0.406857                    |
| Sum of electronic and zero-point Energies   | -4525.551292                |
| Sum of electronic and thermal Energies      | -4525.525504                |
| Sum of electronic and thermal Enthalpies    | -4525.524560                |
| Sum of electronic and thermal Free Energies | -4525.606441                |

| cartesian |            |             |            |   |             |            |             |
|-----------|------------|-------------|------------|---|-------------|------------|-------------|
| 6         | 1.72263396 | -1.61271322 | 2.13605475 | 6 | -1.41226602 | 1.69148684 | -2.32694530 |
| 6         | 2.24903393 | -2.54761314 | 1.21355462 | 6 | -2.73966599 | 0.25968680 | 0.52695471  |
| 6         | 1.16863394 | -3.04921341 | 0.43475473 | 1 | -2.06626606 | 1.18358684 | -3.04584527 |

|    |             |             |             |   |             |             |             |
|----|-------------|-------------|-------------|---|-------------|-------------|-------------|
| 6  | -0.02216601 | -2.42771339 | 0.88535476  | 1 | -0.46176600 | 1.87738669  | -2.83894539 |
| 6  | 0.31973398  | -1.51811326 | 1.92135477  | 6 | -4.01106596 | -0.14761320 | -0.24814527 |
| 1  | -0.37906605 | -0.90941322 | 2.48255467  | 1 | -2.49326611 | -0.54021323 | 1.24285483  |
| 1  | 2.29353380  | -1.07591319 | 2.88475466  | 1 | -2.96226597 | 1.14358675  | 1.14285469  |
| 1  | 3.28443408  | -2.85641336 | 1.14415479  | 6 | -5.19256592 | -0.37841320 | 0.69725472  |
| 1  | 1.23793399  | -3.80521297 | -0.33704528 | 6 | -3.75396585 | -1.39931321 | -1.09184527 |
| 1  | -1.01966608 | -2.61321306 | 0.50715470  | 1 | -4.27946615 | 0.67078680  | -0.92944527 |
| 6  | 3.46073389  | -1.15031314 | -1.49574518 | 1 | -6.09996605 | -0.64121318 | 0.14565472  |
| 6  | 2.35023403  | -1.58381319 | -2.27214527 | 1 | -5.40446615 | 0.51548678  | 1.29025483  |
| 6  | 1.61533403  | -0.43661320 | -2.66514540 | 1 | -4.96996593 | -1.19751322 | 1.39015484  |
| 6  | 2.24783397  | 0.70348680  | -2.10624528 | 1 | -4.64606619 | -1.70211315 | -1.64694524 |
| 6  | 3.39993405  | 0.25988680  | -1.39734530 | 1 | -3.46566606 | -2.24031305 | -0.44894528 |
| 1  | 4.11953402  | 0.88948679  | -0.88674527 | 1 | -2.95306611 | -1.24851322 | -1.82964516 |
| 1  | 4.23533392  | -1.78301322 | -1.08144522 | 6 | 2.59473395  | 2.82398701  | 0.72965473  |
| 1  | 2.12813401  | -2.60551310 | -2.55364537 | 1 | 2.45973396  | 0.74778682  | 1.09135485  |
| 1  | 0.73013401  | -0.42981321 | -3.28824544 | 6 | 1.60293400  | 1.71758676  | 2.76265478  |
| 1  | 1.93593395  | 1.73078680  | -2.24904537 | 1 | 3.58723402  | 2.83458662  | 1.18845463  |
| 40 | 1.40003395  | -0.63571322 | -0.16224527 | 1 | 2.08743382  | 3.75478697  | 0.99785477  |
| 6  | 0.41843396  | 1.50058675  | 0.51125473  | 1 | 2.71343398  | 2.80948687  | -0.35574529 |
| 1  | -0.30966604 | -0.75771320 | -1.01324534 | 1 | 2.57413387  | 1.68668675  | 3.26425457  |
| 1  | 0.33023399  | 2.34628677  | -0.18314527 | 1 | 0.98153400  | 0.90938675  | 3.15475464  |
| 6  | 1.76613402  | 1.63878679  | 1.23965478  | 1 | 1.11953402  | 2.66428661  | 3.01935458  |
| 1  | -0.36776602 | 1.60238683  | 1.27095461  | 1 | -1.87186599 | 2.66958666  | -2.14264536 |
| 13 | -1.25266600 | 0.66138679  | -0.67934525 |   |             |             |             |

### I-1Me

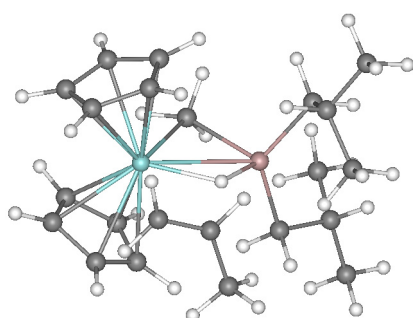

|                                           |                             |
|-------------------------------------------|-----------------------------|
| Zero-point vibrational energy             | 1431865.4 (Joules/Mol)      |
|                                           | 342.22404 (Kcal/Mol)        |
| Zero-point correction                     | 0.545369 (Hartree/Particle) |
| Thermal correction to Energy              | 0.575964                    |
| Thermal correction to Enthalpy            | 0.576908                    |
| Thermal correction to Gibbs Free Energy   | 0.485519                    |
| Sum of electronic and zero-point Energies | -4643.314598                |

|                                             |              |
|---------------------------------------------|--------------|
| Sum of electronic and thermal Energies      | -4643.284003 |
| Sum of electronic and thermal Enthalpies    | -4643.283058 |
| Sum of electronic and thermal Free Energies | -4643.374448 |

| cartesian |             |             |             |    |             |             |
|-----------|-------------|-------------|-------------|----|-------------|-------------|
| 6         | -2.69293213 | -2.09581947 | -1.40069187 | 1  | 0.57376766  | -1.44681942 |
| 6         | -3.57553244 | -2.17311931 | -0.30239192 | 1  | -1.07793236 | -1.31291938 |
| 6         | -2.82423210 | -2.60671926 | 0.82900810  | 1  | -0.07723227 | 0.08578062  |
| 6         | -1.48663235 | -2.80881929 | 0.40830809  | 1  | -0.70173228 | 1.79238057  |
| 6         | -1.39063227 | -2.46041942 | -0.95989192 | 13 | 1.04066777  | -0.07851937 |
| 1         | -0.49543229 | -2.52351928 | -1.56739187 | 6  | 1.75536764  | 1.67858064  |
| 1         | -2.96973228 | -1.84051943 | -2.41369200 | 6  | 2.06016779  | -1.55231941 |
| 1         | -4.63983250 | -1.97441947 | -0.32599193 | 1  | 2.84866762  | 1.62138057  |
| 1         | -3.22023249 | -2.79691935 | 1.81990814  | 6  | 1.43336773  | 2.76278067  |
| 1         | -0.66933227 | -3.15551925 | 1.02710807  | 1  | 1.38286769  | 1.99628055  |
| 6         | -2.74803209 | 2.06588078  | 0.61200809  | 6  | 3.51116753  | -1.61001945 |
| 6         | -3.91503239 | 1.25758064  | 0.46900809  | 1  | 1.58186781  | -2.52801919 |
| 6         | -4.00533247 | 0.42538065  | 1.61180806  | 1  | 2.08596754  | -1.44781947 |
| 6         | -2.88183212 | 0.67828065  | 2.42970800  | 6  | 2.01356792  | 2.38138080  |
| 6         | -2.10773230 | 1.70348060  | 1.81180811  | 6  | 1.95006764  | 4.13958025  |
| 1         | -1.18653226 | 2.13088059  | 2.18980813  | 1  | 0.33766770  | 2.83438063  |
| 1         | -2.40203238 | 2.82948065  | -0.07439191 | 6  | 4.29886770  | -2.74891925 |
| 1         | -4.64413261 | 1.31008053  | -0.32989192 | 6  | 3.53376770  | -1.75201941 |
| 1         | -4.79403257 | -0.28741938 | 1.81790817  | 1  | 4.00726748  | -0.66431934 |
| 1         | -2.66773224 | 0.20448063  | 3.37920809  | 1  | 5.33786774  | -2.76401925 |
| 40        | -1.98033226 | -0.32391936 | 0.28390810  | 1  | 4.30246782  | -2.65281940 |
| 6         | -0.26013228 | -0.72991937 | 2.11160803  | 1  | 3.84776783  | -3.71541929 |
| 1         | -0.30183229 | 0.27508062  | -0.48169193 | 1  | 1.78256762  | 3.13008070  |
| 6         | -2.61463213 | 0.97148067  | -2.37939191 | 1  | 1.63806760  | 1.41198063  |
| 6         | -1.27263236 | 0.94338065  | -2.51429200 | 1  | 3.10436773  | 2.29638076  |
| 6         | -0.49753228 | -0.07721937 | -3.28999186 | 1  | 1.70386779  | 4.90898037  |
| 1         | -3.25093222 | 0.22498064  | -2.84569192 | 1  | 3.03916788  | 4.11508036  |
| 1         | -3.10973215 | 1.85348058  | -1.99119186 | 1  | 1.52496779  | 4.44168043  |
| 1         | -0.11033228 | 0.40158063  | -4.19579220 | 1  | 4.55456781  | -1.84151947 |
| 1         | 0.36776769  | -0.43951935 | -2.72779179 | 1  | 2.98706770  | -2.65191936 |
| 1         | -1.11493230 | -0.92381936 | -3.59669185 | 1  | 3.08126783  | -0.88721937 |

## TS-1Me

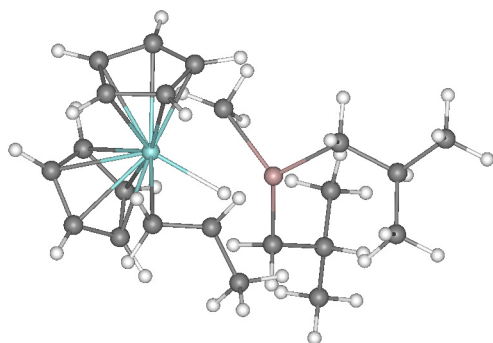

|                                             |                             |
|---------------------------------------------|-----------------------------|
| Zero-point vibrational energy               | 1430503.6 (Joules/Mol)      |
|                                             | 341.89856 (Kcal/Mol)        |
| Zero-point correction                       | 0.544850 (Hartree/Particle) |
| Thermal correction to Energy                | 0.574495                    |
| Thermal correction to Enthalpy              | 0.575439                    |
| Thermal correction to Gibbs Free Energy     | 0.485963                    |
| Sum of electronic and zero-point Energies   | -4643.305193                |
| Sum of electronic and thermal Energies      | -4643.275548                |
| Sum of electronic and thermal Enthalpies    | -4643.274604                |
| Sum of electronic and thermal Free Energies | -4643.364080                |

| cartesian |            |             |             |    |             |             |             |  |  |  |  |
|-----------|------------|-------------|-------------|----|-------------|-------------|-------------|--|--|--|--|
| 6         | 2.32494211 | -2.28705168 | 1.20394516  | 1  | 0.38244197  | -0.73685163 | 2.58134532  |  |  |  |  |
| 6         | 3.06564188 | -1.41925168 | 2.05774522  | 1  | 1.40214193  | 0.68114841  | 2.45234537  |  |  |  |  |
| 6         | 4.25264168 | -1.05385160 | 1.38774514  | 1  | 0.01304197  | -0.68405163 | -3.99355483 |  |  |  |  |
| 6         | 4.24374199 | -1.66455150 | 0.10684520  | 1  | 0.84414196  | -2.00375175 | -1.90195489 |  |  |  |  |
| 6         | 3.06354189 | -2.45085168 | 0.01394520  | 13 | -0.76095808 | -0.03725161 | 0.41474518  |  |  |  |  |
| 1         | 2.77794194 | -3.07245159 | -0.82575476 | 6  | -1.53765798 | 1.64064837  | -0.26255479 |  |  |  |  |
| 1         | 1.37494195 | -2.75535178 | 1.43444514  | 6  | -1.66175795 | -1.77195168 | 0.62854522  |  |  |  |  |
| 1         | 2.78714204 | -1.12145162 | 3.06014538  | 1  | -1.58705807 | 1.65624833  | -1.36045480 |  |  |  |  |
| 1         | 5.03374195 | -0.41815162 | 1.78484511  | 6  | -2.94945812 | 1.92134833  | 0.30454519  |  |  |  |  |
| 1         | 5.02234173 | -1.58335161 | -0.64195478 | 1  | -0.89015806 | 2.48984838  | 0.00874520  |  |  |  |  |
| 6         | 3.21364188 | 2.10254836  | 1.12144518  | 6  | -3.15345812 | -1.83345151 | 0.24174519  |  |  |  |  |
| 6         | 4.09384203 | 1.81094837  | 0.03954519  | 1  | -1.12575805 | -2.55005169 | 0.05864520  |  |  |  |  |
| 6         | 3.37354207 | 1.96444845  | -1.16195488 | 1  | -1.55295801 | -2.07445168 | 1.68164515  |  |  |  |  |
| 6         | 2.03664207 | 2.33954835  | -0.83515477 | 6  | -3.45705795 | 3.29664826  | -0.13605481 |  |  |  |  |
| 6         | 1.95894194 | 2.45974827  | 0.57204521  | 6  | -2.96485806 | 1.81274843  | 1.83194518  |  |  |  |  |
| 1         | 1.08094192 | 2.74944830  | 1.13524520  | 1  | -3.63965797 | 1.16624832  | -0.09265481 |  |  |  |  |
| 1         | 3.47584200 | 2.10304832  | 2.17294526  | 6  | -3.75745821 | -3.19505167 | 0.59734523  |  |  |  |  |
| 1         | 5.14074183 | 1.54654837  | 0.11844520  | 6  | -3.35255814 | -1.54015160 | -1.24675488 |  |  |  |  |
| 1         | 3.78614187 | 1.85524845  | -2.15475464 | 1  | -3.69565821 | -1.06785154 | 0.81344521  |  |  |  |  |
| 1         | 1.23884201 | 2.56214833  | -1.53475487 | 1  | -4.82245827 | -3.23645163 | 0.35034519  |  |  |  |  |

|    |             |             |             |   |             |             |             |
|----|-------------|-------------|-------------|---|-------------|-------------|-------------|
| 40 | 2.35394192  | -0.00485160 | 0.08614519  | 1 | -3.64925814 | -3.40915155 | 1.66434515  |
| 6  | -0.00735807 | -0.27655160 | -2.97745466 | 1 | -3.25125813 | -3.99225163 | 0.04144520  |
| 6  | 1.07584190  | -0.97965163 | -2.19675469 | 1 | -4.47445822 | 3.47984838  | 0.22184519  |
| 6  | 2.42124200  | -0.63125163 | -2.34985471 | 1 | -3.45985794 | 3.38484836  | -1.22615480 |
| 1  | 0.60684198  | -0.44725162 | -0.76765478 | 1 | -2.81215811 | 4.08724833  | 0.26414520  |
| 1  | -1.00235808 | -0.45035160 | -2.56455469 | 1 | -3.94755793 | 2.05974841  | 2.24344540  |
| 1  | 0.17844194  | 0.79774839  | -3.04075480 | 1 | -2.23935795 | 2.50624824  | 2.27674532  |
| 1  | 3.17444205  | -1.41035151 | -2.35175467 | 1 | -2.72545815 | 0.79674840  | 2.17934537  |
| 1  | 2.63044190  | 0.22484839  | -2.98155475 | 1 | -4.40645790 | -1.61125159 | -1.53085482 |
| 6  | 0.53194195  | 0.18774839  | 2.01594520  | 1 | -2.79705811 | -2.26425171 | -1.85665488 |
| 1  | -0.26735806 | 0.88374841  | 2.33944535  | 1 | -3.01175809 | -0.53255159 | -1.51525486 |

### I-2Me\_a

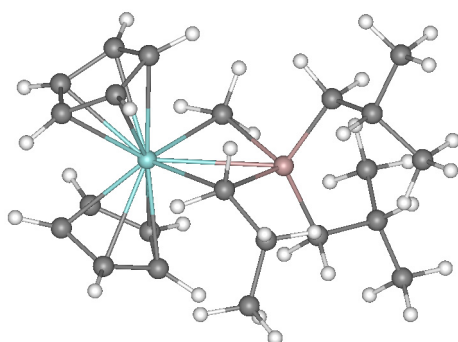

|                                             |                             |
|---------------------------------------------|-----------------------------|
| Zero-point vibrational energy               | 1441645.2 (Joules/Mol)      |
|                                             | 344.56147 (Kcal/Mol)        |
| Zero-point correction                       | 0.549094 (Hartree/Particle) |
| Thermal correction to Energy                | 0.578996                    |
| Thermal correction to Enthalpy              | 0.579940                    |
| Thermal correction to Gibbs Free Energy     | 0.490410                    |
| Sum of electronic and zero-point Energies   | -4643.333929                |
| Sum of electronic and thermal Energies      | -4643.304027                |
| Sum of electronic and thermal Enthalpies    | -4643.303083                |
| Sum of electronic and thermal Free Energies | -4643.392612                |

### cartesian

|    |             |             |             |    |             |             |             |
|----|-------------|-------------|-------------|----|-------------|-------------|-------------|
| 6  | -3.52572870 | -2.09423542 | 0.73813713  | 1  | -0.10582894 | -0.97483546 | 2.20883703  |
| 6  | -2.18292904 | -2.47163534 | 0.46183711  | 1  | -1.72322893 | -0.53913546 | 2.44973707  |
| 6  | -1.93322897 | -2.23363543 | -0.90706289 | 1  | -0.52542889 | 0.72476453  | 2.49733710  |
| 6  | -3.12792873 | -1.72133553 | -1.49006283 | 13 | 0.61807108  | 0.06056455  | 0.26253712  |
| 6  | -4.11352873 | -1.65313542 | -0.47796288 | 6  | 1.55577099  | 1.70786452  | 0.78893709  |
| 40 | -2.36502886 | 0.02956454  | 0.14613712  | 6  | 1.48237097  | -1.68393552 | -0.04616288 |
| 6  | -0.63032889 | 0.79546452  | -1.36576283 | 1  | 2.17357111  | 1.49236453  | 1.67603719  |

|   |             |             |             |   |            |             |             |
|---|-------------|-------------|-------------|---|------------|-------------|-------------|
| 6 | -0.81002891 | -0.17463546 | 1.94153714  | 6 | 2.45687103 | 2.39496469  | -0.25856286 |
| 6 | -2.50562906 | 2.43566465  | 0.93463707  | 1 | 0.80427110 | 2.43346477  | 1.13993716  |
| 6 | -3.27752876 | 1.67056453  | 1.84993720  | 6 | 2.74467087 | -1.92763543 | 0.81483710  |
| 6 | -4.38412905 | 1.13236451  | 1.15383720  | 1 | 0.78627110 | -2.52003527 | 0.13463712  |
| 6 | -4.30592871 | 1.57196450  | -0.19876289 | 1 | 1.77557099 | -1.77683544 | -1.10206282 |
| 6 | -3.15752888 | 2.39356470  | -0.32056287 | 6 | 3.63217115 | 1.49666452  | -0.65236288 |
| 1 | -1.00562894 | -2.43553543 | -1.42316282 | 6 | 2.97907114 | 3.73826456  | 0.26093712  |
| 1 | -3.27022886 | -1.46383548 | -2.53346300 | 1 | 1.86437118 | 2.60176468  | -1.16266286 |
| 1 | -1.47422886 | -2.87233543 | 1.17613721  | 6 | 3.39537096 | -3.26663542 | 0.45713714  |
| 1 | -4.02862883 | -2.17833543 | 1.69473720  | 6 | 2.43547106 | -1.87673545 | 2.31333709  |
| 1 | -5.13722897 | -1.32503545 | -0.60716289 | 1 | 3.46987104 | -1.13293552 | 0.59923708  |
| 1 | -5.16612911 | 0.51496452  | 1.57843721  | 1 | 4.31627083 | -3.42853546 | 1.02533710  |
| 1 | -3.05732870 | 1.52736449  | 2.90063715  | 1 | 3.64237118 | -3.31353545 | -0.60726291 |
| 1 | -1.59662890 | 2.97756457  | 1.16633713  | 1 | 2.71277094 | -4.09453583 | 0.68073708  |
| 1 | -2.83082914 | 2.89026475  | -1.22606289 | 1 | 4.26547098 | 1.97516453  | -1.40486288 |
| 1 | -5.02332926 | 1.36106455  | -0.98256296 | 1 | 3.30597115 | 0.53066450  | -1.05766284 |
| 1 | -1.62322891 | 0.66356450  | -1.87336290 | 1 | 4.25607109 | 1.28666449  | 0.22413711  |
| 1 | -0.57212889 | 1.87236452  | -1.16556287 | 1 | 3.60477114 | 4.23926449  | -0.48396286 |
| 6 | 0.37147105  | 0.50406456  | -2.52076292 | 1 | 3.58357096 | 3.58566475  | 1.16183710  |
| 6 | 0.11157107  | -0.78063548 | -3.30116296 | 1 | 2.15617085 | 4.41106462  | 0.52003711  |
| 1 | 1.40487111  | 0.49906456  | -2.15216303 | 1 | 3.31847095 | -2.12633538 | 2.90823698  |
| 1 | 0.73427105  | -0.80513549 | -4.19816256 | 1 | 1.65297115 | -2.60243535 | 2.57293701  |
| 1 | -0.93262893 | -0.84443545 | -3.62656307 | 1 | 2.10487127 | -0.88183546 | 2.63693714  |
| 1 | 0.35187113  | -1.67283547 | -2.72106290 | 1 | 0.32457107 | 1.35406458  | -3.20906305 |

## I-2Me\_bi

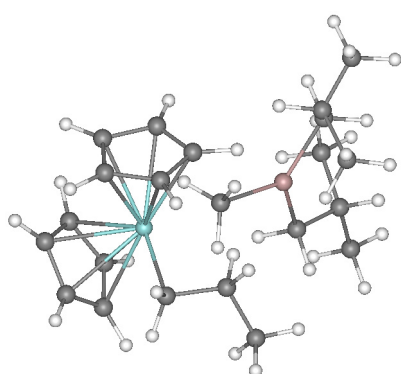

|                                         |                             |
|-----------------------------------------|-----------------------------|
| Zero-point vibrational energy           | 1438065.7 (Joules/Mol)      |
|                                         | 343.70594 (Kcal/Mol)        |
| Zero-point correction                   | 0.547730 (Hartree/Particle) |
| Thermal correction to Energy            | 0.578739                    |
| Thermal correction to Enthalpy          | 0.579683                    |
| Thermal correction to Gibbs Free Energy | 0.482591                    |

|                                             |              |
|---------------------------------------------|--------------|
| Sum of electronic and zero-point Energies   | -4643.319937 |
| Sum of electronic and thermal Energies      | -4643.288928 |
| Sum of electronic and thermal Enthalpies    | -4643.287984 |
| Sum of electronic and thermal Free Energies | -4643.385077 |

| cartesian |             |             |             |    |             |             |             |
|-----------|-------------|-------------|-------------|----|-------------|-------------|-------------|
| 6         | -3.63423848 | 1.96965325  | 0.01978227  | 1  | -0.20193857 | 0.61075324  | 0.11188227  |
| 6         | -4.33253860 | 1.30425322  | 1.05638230  | 1  | -0.10143858 | -1.17774677 | -0.34761775 |
| 6         | -3.42953849 | 1.11315322  | 2.13968229  | 1  | -0.14953858 | -0.67374676 | 1.40828228  |
| 6         | -2.17173862 | 1.62425327  | 1.75678229  | 1  | -2.36533856 | 1.26135325  | -2.70471764 |
| 6         | -2.29463863 | 2.14985347  | 0.43858224  | 13 | 2.14006138  | -0.18174675 | 0.35148227  |
| 1         | -1.51123857 | 2.64085340  | -0.12951772 | 6  | 2.71456146  | 1.65885329  | 0.68888223  |
| 1         | -4.05253887 | 2.28695345  | -0.92571777 | 6  | 3.19036150  | -1.76474679 | -0.08461772 |
| 1         | -5.37913895 | 1.02505326  | 1.03928232  | 1  | 3.66996169  | 1.84625328  | 0.17628227  |
| 1         | -3.66383862 | 0.65545326  | 3.09248233  | 6  | 1.68816137  | 2.72775340  | 0.26628226  |
| 1         | -1.27553856 | 1.62975323  | 2.36638236  | 1  | 2.94276142  | 1.77355325  | 1.75898230  |
| 6         | -2.83073854 | -2.87484670 | -0.09341772 | 6  | 4.71326113  | -1.60104680 | 0.09088227  |
| 6         | -4.12503862 | -2.39364672 | 0.25138226  | 1  | 2.84636140  | -2.62024665 | 0.51798224  |
| 6         | -4.07003880 | -1.91804671 | 1.57958233  | 1  | 2.96106148  | -2.04684663 | -1.12451768 |
| 6         | -2.73993850 | -2.09444666 | 2.06218219  | 6  | 1.39156151  | 2.64105344  | -1.23491764 |
| 6         | -1.99393868 | -2.71964669 | 1.03338230  | 6  | 2.16116142  | 4.13895321  | 0.62758225  |
| 1         | -0.95373857 | -3.01484656 | 1.09418225  | 1  | 0.75126141  | 2.54565334  | 0.81678224  |
| 1         | -2.54803848 | -3.31664658 | -1.04171765 | 6  | 5.45936108  | -2.85364652 | -0.37611777 |
| 1         | -4.99993896 | -2.40074658 | -0.38491774 | 6  | 5.05956125  | -1.28564680 | 1.54828227  |
| 1         | -4.90103865 | -1.50924671 | 2.14028215  | 1  | 5.04876137  | -0.75814676 | -0.52771777 |
| 1         | -2.38443851 | -1.85484672 | 3.05688238  | 1  | 6.54216146  | -2.73104668 | -0.28001773 |
| 40        | -2.63703847 | -0.35644674 | 0.26268226  | 1  | 5.23606110  | -3.08124661 | -1.42221773 |
| 6         | 0.12766141  | -0.39574674 | 0.38518226  | 1  | 5.16366148  | -3.71884656 | 0.22738227  |
| 1         | -1.44433856 | 0.33275324  | -1.58731771 | 1  | 0.66466147  | 3.39575338  | -1.55291772 |
| 6         | -3.54543853 | -0.33034673 | -1.80811763 | 1  | 0.99716145  | 1.65715325  | -1.53301764 |
| 6         | -2.24203849 | 0.22525325  | -2.37561774 | 1  | 2.30796146  | 2.80775332  | -1.81191766 |
| 6         | -1.60633850 | -0.62964672 | -3.47541761 | 1  | 1.41776156  | 4.89435339  | 0.35408229  |
| 1         | -4.41023874 | 0.29645324  | -2.01931763 | 1  | 3.09046149  | 4.37285328  | 0.09788227  |
| 1         | -3.73813844 | -1.33304679 | -2.19331765 | 1  | 2.35626149  | 4.22535324  | 1.69968235  |
| 1         | -0.65093857 | -0.21604675 | -3.80771780 | 1  | 6.13906145  | -1.18724680 | 1.69138229  |
| 1         | -2.27413869 | -0.68454677 | -4.33761787 | 1  | 4.70926142  | -2.08864665 | 2.20718241  |
| 1         | -1.43403864 | -1.65134680 | -3.12251759 | 1  | 4.60246134  | -0.34634674 | 1.88628232  |

# I-2Me\_bo

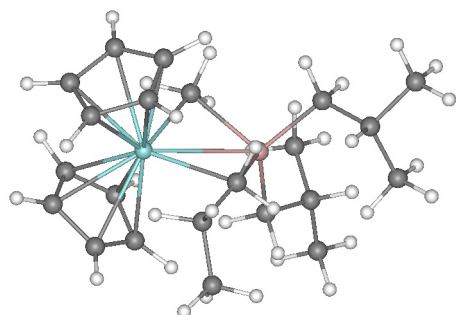

|                                             |                             |
|---------------------------------------------|-----------------------------|
| Zero-point vibrational energy               | 1445477.8 (Joules/Mol)      |
|                                             | 345.47749 (Kcal/Mol)        |
| Zero-point correction                       | 0.550553 (Hartree/Particle) |
| Thermal correction to Energy                | 0.579911                    |
| Thermal correction to Enthalpy              | 0.580855                    |
| Thermal correction to Gibbs Free Energy     | 0.493244                    |
| Sum of electronic and zero-point Energies   | -4643.336456                |
| Sum of electronic and thermal Energies      | -4643.307099                |
| Sum of electronic and thermal Enthalpies    | -4643.306155                |
| Sum of electronic and thermal Free Energies | -4643.393766                |

| cartesian |             |             |             |    |             |             |             |
|-----------|-------------|-------------|-------------|----|-------------|-------------|-------------|
| 6         | -3.12375951 | 2.33801627  | 0.08799675  | 1  | -1.42365956 | -0.72818387 | 2.53339672  |
| 6         | -4.23115969 | 1.44631612  | 0.09369675  | 1  | -0.37485963 | 0.66981614  | 2.60379672  |
| 6         | -4.27935982 | 0.82761616  | 1.37209678  | 1  | 0.22524035  | -0.95898384 | 2.27349687  |
| 6         | -3.18795967 | 1.30501616  | 2.13059688  | 1  | -1.92195964 | -0.06658386 | -4.16770315 |
| 6         | -2.46745968 | 2.23731613  | 1.33259678  | 13 | 0.78584039  | 0.02891614  | 0.38569674  |
| 1         | -1.58055961 | 2.78301620  | 1.63219678  | 6  | 1.83474040  | 1.60551620  | 0.91679680  |
| 1         | -2.82925963 | 2.97691607  | -0.73540330 | 6  | 1.58634043  | -1.67228389 | -0.20230326 |
| 1         | -4.94735956 | 1.31121612  | -0.70820320 | 1  | 2.61074042  | 1.28541613  | 1.63069677  |
| 1         | -2.95275950 | 1.02771616  | 3.15039682  | 6  | 2.53324032  | 2.39301610  | -0.21370324 |
| 6         | -1.67495966 | -2.26418376 | -0.86890328 | 1  | 1.19724035  | 2.29921627  | 1.48729682  |
| 6         | -2.95025969 | -1.88348389 | -1.37350321 | 6  | 2.96884036  | -1.94618380 | 0.43169674  |
| 6         | -3.86445951 | -1.86368382 | -0.29750326 | 1  | 0.94924033  | -2.54218388 | 0.02039675  |
| 6         | -3.16145968 | -2.24418378 | 0.88089681  | 1  | 1.69734049  | -1.66948378 | -1.29910326 |
| 6         | -1.81925964 | -2.51388383 | 0.51729679  | 6  | 3.48804045  | 1.50321615  | -1.01400328 |
| 1         | -1.03365970 | -2.84478378 | 1.18479681  | 6  | 3.28994036  | 3.60211611  | 0.34449676  |
| 1         | -0.76935959 | -2.40888381 | -1.44380319 | 1  | 1.77034044  | 2.77591610  | -0.90670323 |
| 1         | -3.18465972 | -1.66348386 | -2.40850329 | 6  | 3.59624052  | -3.22078395 | -0.13890325 |
| 1         | -3.58975959 | -2.35258389 | 1.87049675  | 6  | 2.86334038  | -2.04668379 | 1.95639682  |
| 40        | -2.21565962 | -0.03078386 | 0.20219675  | 1  | 3.63534021  | -1.10738385 | 0.19549675  |
| 6         | -0.57745963 | -0.24048385 | 2.03189683  | 1  | 4.59184027  | -3.39678383 | 0.27939677  |

|   |             |             |             |   |            |             |             |
|---|-------------|-------------|-------------|---|------------|-------------|-------------|
| 6 | -1.11095965 | 0.04191614  | -3.44400311 | 1 | 3.69204044 | -3.16108394 | -1.22680318 |
| 6 | -0.47505963 | 0.98271620  | -1.13830316 | 1 | 2.97414041 | -4.09158373 | 0.09749675  |
| 6 | -1.53165960 | 0.90581614  | -2.25570321 | 1 | 3.98114061 | 2.06511617  | -1.81250322 |
| 1 | -1.77725959 | 1.91531610  | -2.59640312 | 1 | 2.97854042 | 0.64841616  | -1.47920322 |
| 1 | -0.37375963 | 2.01501608  | -0.79070330 | 1 | 4.26984024 | 1.10161614  | -0.35950324 |
| 1 | 0.47934043  | 0.74771619  | -1.63710320 | 1 | 3.76294041 | 4.18241596  | -0.45360324 |
| 1 | -2.54135966 | 0.53741616  | -1.93000317 | 1 | 4.07584047 | 3.27141619  | 1.03209674  |
| 1 | -0.79055965 | -0.95348382 | -3.12810326 | 1 | 2.62104034 | 4.26761627  | 0.89809680  |
| 1 | -0.26785964 | 0.51361614  | -3.95440340 | 1 | 3.82404041 | -2.31188393 | 2.40679669  |
| 1 | -4.91815948 | -1.62308383 | -0.36370325 | 1 | 2.14194036 | -2.82348394 | 2.24209690  |
| 1 | -5.02525949 | 0.11891615  | 1.70949674  | 1 | 2.54824042 | -1.10078382 | 2.41599679  |

### I-4Me\_a

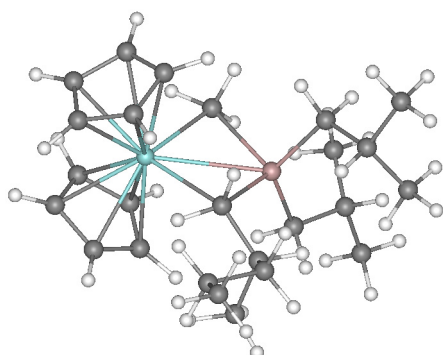

|                                             |                             |
|---------------------------------------------|-----------------------------|
| Zero-point vibrational energy               | 1668209.5 (Joules/Mol)      |
|                                             | 398.71165 (Kcal/Mol)        |
| Zero-point correction                       | 0.635387 (Hartree/Particle) |
| Thermal correction to Energy                | 0.669386                    |
| Thermal correction to Enthalpy              | 0.670330                    |
| Thermal correction to Gibbs Free Energy     | 0.571478                    |
| Sum of electronic and zero-point Energies   | -4761.137088                |
| Sum of electronic and thermal Energies      | -4761.103090                |
| Sum of electronic and thermal Enthalpies    | -4761.102145                |
| Sum of electronic and thermal Free Energies | -4761.200997                |

### cartesian

|    |            |             |             |   |             |             |             |
|----|------------|-------------|-------------|---|-------------|-------------|-------------|
| 6  | 3.43406200 | -2.66643810 | 0.76999581  | 1 | 1.79796195  | 3.32066178  | 0.77989584  |
| 6  | 2.10206199 | -2.72813821 | 1.26329577  | 1 | 1.32886195  | 3.42906189  | 2.47299576  |
| 6  | 1.87066197 | -1.57763815 | 2.04739571  | 1 | 1.97166193  | 5.67136192  | 1.57789576  |
| 6  | 3.06746197 | -0.80463821 | 2.05939579  | 1 | 0.26766199  | 5.66046190  | 2.04229593  |
| 6  | 4.03526211 | -1.48683810 | 1.28619587  | 1 | 0.71696198  | 5.54986191  | 0.33789581  |
| 40 | 2.25566196 | -0.76163816 | -0.32090417 | 1 | -0.01763803 | -2.92883825 | -0.93450421 |
| 6  | 0.55136198 | 0.88356179  | 0.21849582  | 1 | 1.57916200  | -2.80543804 | -1.49140418 |

|   |             |             |             |    |             |             |             |
|---|-------------|-------------|-------------|----|-------------|-------------|-------------|
| 6 | 0.66796196  | -2.18913817 | -1.36750424 | 1  | 0.34266198  | -1.98053813 | -2.39250422 |
| 6 | 2.35296202  | 0.33546180  | -2.60340428 | 13 | -0.73523808 | -0.76303822 | -0.38790417 |
| 6 | 3.11006212  | -0.86223817 | -2.70550418 | 6  | -1.65523803 | 0.00166181  | -1.95020413 |
| 6 | 4.23846197  | -0.74513817 | -1.86170423 | 6  | -1.64433801 | -1.74633813 | 1.05809581  |
| 6 | 4.18856192  | 0.53496182  | -1.23890424 | 1  | -2.29873800 | -0.77233821 | -2.39970422 |
| 6 | 3.03576183  | 1.20416188  | -1.71870422 | 6  | -2.51503801 | 1.26116180  | -1.71920419 |
| 1 | 0.95386195  | -1.34583831 | 2.57009578  | 1  | -0.90373802 | 0.22466180  | -2.72440410 |
| 1 | 3.22286177  | 0.12606180  | 2.59339571  | 6  | -2.89313793 | -2.53843808 | 0.60089582  |
| 1 | 1.38576198  | -3.51673818 | 1.06909585  | 1  | -0.96483803 | -2.44623804 | 1.57369578  |
| 1 | 3.92306185  | -3.41273808 | 0.15469584  | 1  | -1.97333801 | -1.04243827 | 1.83619583  |
| 1 | 5.05656195  | -1.16863823 | 1.11919582  | 6  | -3.69643784 | 0.96776181  | -0.79050416 |
| 1 | 5.01506233  | -1.48823810 | -1.72940421 | 6  | -3.02483797 | 1.83646178  | -3.04430413 |
| 1 | 2.86506176  | -1.71603823 | -3.32500410 | 1  | -1.89173806 | 2.03416181  | -1.24510419 |
| 1 | 1.43386197  | 0.55466181  | -3.13300419 | 6  | -3.57483768 | -3.21063805 | 1.79619586  |
| 1 | 2.72416210  | 2.20336175  | -1.43890417 | 6  | -2.56363821 | -3.58273816 | -0.46870419 |
| 1 | 4.92406225  | 0.94466180  | -0.55750418 | 1  | -3.60633802 | -1.82923818 | 0.16169584  |
| 1 | 1.55966198  | 1.11556172  | 0.65599585  | 1  | -4.48903799 | -3.73093820 | 1.49509585  |
| 1 | 0.50646198  | 1.49606180  | -0.69210416 | 1  | -3.83903790 | -2.47763824 | 2.56379580  |
| 6 | -0.40983802 | 1.55716181  | 1.24589586  | 1  | -2.90313816 | -3.94723821 | 2.25159574  |
| 6 | -0.33153802 | 3.09226179  | 1.12189579  | 1  | -4.28723812 | 1.86876178  | -0.60170418 |
| 6 | -0.16193801 | 1.10606170  | 2.68699574  | 1  | -3.37963820 | 0.56846184  | 0.18109581  |
| 1 | -1.44683802 | 1.29246187  | 0.99299586  | 1  | -4.36013794 | 0.22416180  | -1.24670422 |
| 1 | -0.72693801 | 1.73706174  | 3.37889576  | 1  | -3.62503767 | 2.73756194  | -2.88440418 |
| 1 | 0.89596200  | 1.18796182  | 2.95989585  | 1  | -3.65163803 | 1.10066175  | -3.55950427 |
| 1 | -0.48443806 | 0.07746181  | 2.85619593  | 1  | -2.19633818 | 2.09556198  | -3.71030426 |
| 1 | -1.08933806 | 3.52236176  | 1.78799582  | 1  | -3.44483805 | -4.17893839 | -0.72200418 |
| 1 | -0.61653805 | 3.38666177  | 0.10389582  | 1  | -1.79353797 | -4.27833796 | -0.10920417 |
| 6 | 1.02686203  | 3.71066189  | 1.45809579  | 1  | -2.20943785 | -3.12763810 | -1.40190423 |
| 6 | 0.99706197  | 5.23596191  | 1.34739578  |    |             |             |             |

#### I-4Me\_bi

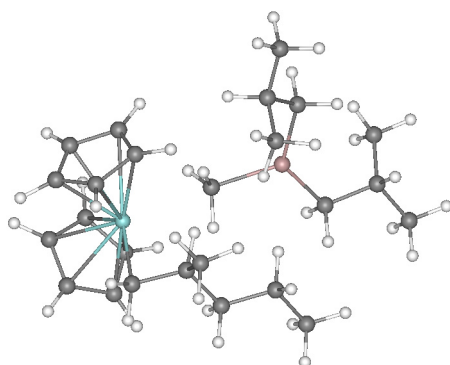

Zero-point vibrational energy

1665611.7 (Joules/Mol)

|                                             |                             |
|---------------------------------------------|-----------------------------|
|                                             | 398.09075 (Kcal/Mol)        |
| Zero-point correction                       | 0.634398 (Hartree/Particle) |
| Thermal correction to Energy                | 0.668909                    |
| Thermal correction to Enthalpy              | 0.669853                    |
| Thermal correction to Gibbs Free Energy     | 0.567649                    |
| Sum of electronic and zero-point Energies   | -4761.126077                |
| Sum of electronic and thermal Energies      | -4761.091567                |
| Sum of electronic and thermal Enthalpies    | -4761.090622                |
| Sum of electronic and thermal Free Energies | -4761.192827                |

| cartesian |             |             |             |   |             |             |
|-----------|-------------|-------------|-------------|---|-------------|-------------|
| 6         | -3.76286173 | 1.82410979  | -0.52804798 | 6 | 2.46563816  | 2.16410995  |
| 6         | -4.52256203 | 1.51990986  | 0.62715209  | 6 | 3.16203833  | -1.29519022 |
| 6         | -3.71416187 | 1.78990984  | 1.76785207  | 1 | 3.42003822  | 2.24830985  |
| 6         | -2.45166183 | 2.22250986  | 1.31485200  | 6 | 1.40043831  | 3.02251005  |
| 6         | -2.47386169 | 2.23410988  | -0.11004797 | 1 | 2.67003822  | 2.58880997  |
| 1         | -1.66126180 | 2.54621005  | -0.75834793 | 6 | 4.67413807  | -0.99769014 |
| 1         | -4.11776161 | 1.76690984  | -1.54704785 | 1 | 2.90713835  | -1.93779016 |
| 1         | -5.55316162 | 1.18690979  | 0.63745201  | 1 | 2.91163826  | -1.90209019 |
| 1         | -4.01486206 | 1.68390989  | 2.80255198  | 6 | 1.12353826  | 2.49430990  |
| 1         | -1.61536181 | 2.50540996  | 1.94365215  | 6 | 1.81463814  | 4.49591017  |
| 6         | -2.91196179 | -2.70409012 | 1.08725202  | 1 | 0.46363819  | 2.96771002  |
| 6         | -4.22316170 | -2.15288997 | 1.10295200  | 6 | 5.48923826  | -2.28928995 |
| 6         | -4.30416203 | -1.26359022 | 2.19795203  | 6 | 5.05853844  | -0.23189013 |
| 6         | -3.03796172 | -1.23879015 | 2.84745193  | 1 | 4.92113829  | -0.36819014 |
| 6         | -2.19486189 | -2.15918994 | 2.17245197  | 1 | 6.56363821  | -2.08349013 |
| 1         | -1.17326176 | -2.39778996 | 2.44065189  | 1 | 5.23983812  | -2.83959007 |
| 1         | -2.54016161 | -3.43409014 | 0.37895203  | 1 | 5.28053808  | -2.94259000 |
| 1         | -5.02176189 | -2.38688993 | 0.41085204  | 1 | 0.40563822  | 3.12180996  |
| 1         | -5.18286180 | -0.70719016 | 2.49785209  | 1 | 0.72453821  | 1.46820986  |
| 1         | -2.78696179 | -0.67309016 | 3.73625207  | 1 | 2.04733825  | 2.47610998  |
| 40        | -2.70476174 | -0.19559012 | 0.60035205  | 1 | 1.04443824  | 5.10991001  |
| 6         | 0.01663822  | -0.05559013 | 1.10085201  | 1 | 2.73853827  | 4.60340977  |
| 1         | -1.25616169 | 0.04790987  | -1.17344785 | 1 | 1.99723816  | 4.89541006  |
| 6         | -3.19966173 | -0.93159014 | -1.48524785 | 1 | 6.13293839  | -0.03259013 |
| 6         | -1.78196180 | -0.58639014 | -1.94574809 | 1 | 4.79753828  | -0.81469017 |
| 6         | -0.89616179 | -1.83479011 | -2.09214807 | 1 | 4.54713821  | 0.73710984  |
| 1         | -3.96906185 | -0.42449012 | -2.06694794 | 1 | -2.14546180 | -0.25019014 |
| 1         | -3.38206172 | -2.00659013 | -1.52804804 | 1 | -0.75666177 | 0.66550982  |
| 6         | 0.58813822  | -1.56079018 | -2.33734798 | 1 | -2.40256166 | 1.18690979  |
| 1         | -1.29566169 | -2.44168997 | -2.91494799 | 6 | 1.41723824  | -2.84439015 |

|    |             |             |             |   |            |             |             |
|----|-------------|-------------|-------------|---|------------|-------------|-------------|
| 1  | -0.99516177 | -2.45599008 | -1.18964791 | 1 | 0.96553826 | -0.86889017 | -1.56694794 |
| 1  | -0.36076176 | 0.80780983  | 0.54285204  | 1 | 0.72553825 | -1.04939020 | -3.29494810 |
| 1  | -0.14276177 | -1.03219020 | 0.62875205  | 1 | 2.47423816 | -2.64089012 | -2.50564814 |
| 1  | -0.28176177 | -0.04209013 | 2.15425205  | 1 | 1.07053828 | -3.53919005 | -3.08904791 |
| 6  | -1.76316178 | 0.31060988  | -3.18984795 | 1 | 1.33503819 | -3.35229015 | -1.35244799 |
| 13 | 2.00433826  | 0.27340987  | 0.94625205  |   |            |             |             |

### I-4Me\_bo

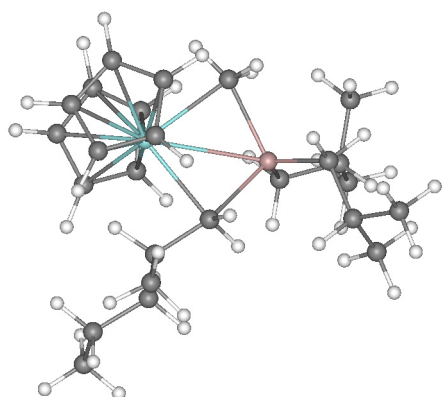

|                                             |                             |
|---------------------------------------------|-----------------------------|
| Zero-point vibrational energy               | 1671569.5 (Joules/Mol)      |
|                                             | 399.51469 (Kcal/Mol)        |
| Zero-point correction                       | 0.636667 (Hartree/Particle) |
| Thermal correction to Energy                | 0.670064                    |
| Thermal correction to Enthalpy              | 0.671008                    |
| Thermal correction to Gibbs Free Energy     | 0.574389                    |
| Sum of electronic and zero-point Energies   | -4761.138220                |
| Sum of electronic and thermal Energies      | -4761.104823                |
| Sum of electronic and thermal Enthalpies    | -4761.103878                |
| Sum of electronic and thermal Free Energies | -4761.200498                |

### cartesian

|   |            |             |             |    |             |             |             |
|---|------------|-------------|-------------|----|-------------|-------------|-------------|
| 6 | 2.09623671 | -2.15178728 | -1.97207606 | 1  | 2.01823664  | 0.33881265  | -3.15957594 |
| 6 | 3.34543681 | -1.58198738 | -1.59627604 | 1  | 1.14743674  | 2.46521282  | 0.51042396  |
| 6 | 3.83313680 | -2.29548740 | -0.47737604 | 1  | 0.66263676  | 3.11081266  | -1.04047608 |
| 6 | 2.88493681 | -3.30108738 | -0.14917605 | 1  | 4.52553654  | -0.65588737 | 1.89052391  |
| 6 | 1.82763672 | -3.22268724 | -1.09077609 | 1  | 4.78103638  | -2.12828732 | 0.01602396  |
| 1 | 0.96463668 | -3.87298727 | -1.13157606 | 1  | 0.51603675  | -3.05658722 | 1.39822388  |
| 1 | 1.48053670 | -1.86068738 | -2.81347609 | 1  | -0.69676328 | -3.11658716 | 0.15462396  |
| 1 | 3.85243678 | -0.76398736 | -2.09457588 | 1  | -0.98026323 | -2.31418753 | 1.70162392  |
| 1 | 2.98263669 | -4.03488731 | 0.64202398  | 13 | -1.22986329 | -0.68008733 | 0.16382396  |
| 6 | 1.40663671 | 0.47941267  | 2.27842402  | 6  | -2.31626320 | -1.33128738 | -1.34107614 |
| 6 | 2.74693680 | 0.68131262  | 1.85062397  | 6  | -1.93206334 | 0.38131267  | 1.66782391  |

|    |             |             |             |   |             |             |             |
|----|-------------|-------------|-------------|---|-------------|-------------|-------------|
| 6  | 3.47083664  | -0.50948739 | 2.08192396  | 1 | -3.20376325 | -1.84518731 | -0.93737608 |
| 6  | 2.58213687  | -1.45458734 | 2.66862392  | 6 | -2.80326319 | -0.28778735 | -2.36977601 |
| 6  | 1.31943667  | -0.83078736 | 2.81002402  | 1 | -1.75336313 | -2.11578751 | -1.87277603 |
| 1  | 0.43663672  | -1.27798736 | 3.24812412  | 6 | -3.41526318 | 0.08401266  | 1.98332393  |
| 1  | 0.60713673  | 1.20881259  | 2.26312399  | 1 | -1.36426330 | 0.21171266  | 2.59612393  |
| 1  | 3.15183687  | 1.59611261  | 1.43472385  | 1 | -1.82376313 | 1.45751262  | 1.45612395  |
| 1  | 2.84243679  | -2.45438719 | 2.99502397  | 6 | -3.62666345 | 0.81871259  | -1.70547605 |
| 40 | 1.75883675  | -1.09668732 | 0.32222396  | 6 | -3.62106347 | -0.95078737 | -3.48227596 |
| 6  | -0.24456325 | -2.44688749 | 0.89232397  | 1 | -1.92866325 | 0.18291265  | -2.84147596 |
| 1  | 2.91453671  | 3.77761269  | -1.60687613 | 6 | -3.94036317 | 1.00481260  | 3.08782411  |
| 6  | 1.47453678  | 2.57811260  | -0.52937603 | 6 | -3.60816312 | -1.38218737 | 2.38102412  |
| 6  | 2.74413681  | 3.43261242  | -0.58277601 | 1 | -4.00966358 | 0.26771265  | 1.07972395  |
| 6  | 2.65093684  | 4.64061260  | 0.34922397  | 1 | -4.99936342 | 0.82091260  | 3.29212403  |
| 1  | 3.62203670  | 2.82661247  | -0.31937605 | 1 | -3.82666326 | 2.05701256  | 2.81142402  |
| 1  | 3.54393673  | 5.26481295  | 0.28172398  | 1 | -3.38506317 | 0.83951271  | 4.01822376  |
| 1  | 2.53743672  | 4.32671261  | 1.39182389  | 1 | -3.97296309 | 1.55201268  | -2.43967605 |
| 1  | 1.78773677  | 5.26111269  | 0.09382395  | 1 | -3.05976319 | 1.36301267  | -0.93807608 |
| 6  | 0.32313672  | 0.35341263  | -0.99877602 | 1 | -4.51206350 | 0.39311266  | -1.21967614 |
| 6  | 1.60163677  | 1.19371259  | -1.18477607 | 1 | -3.94206309 | -0.22138736 | -4.23227596 |
| 6  | 1.98793674  | 1.31231260  | -2.66507602 | 1 | -4.51816368 | -1.41948736 | -3.06347609 |
| 1  | 0.07423672  | -0.13758735 | -1.94377601 | 1 | -3.04436326 | -1.72918737 | -3.99047613 |
| 1  | -0.47786328 | 1.09271264  | -0.82707602 | 1 | -4.64506340 | -1.58698738 | 2.66182399  |
| 1  | 2.51293683  | 0.73401260  | -0.69597602 | 1 | -2.97886324 | -1.63308740 | 3.24492407  |
| 1  | 2.96273685  | 1.79031265  | -2.79017591 | 1 | -3.35766315 | -2.07178736 | 1.56442392  |
| 1  | 1.23863673  | 1.92111266  | -3.18067598 |   |             |             |             |

### TS-4Me

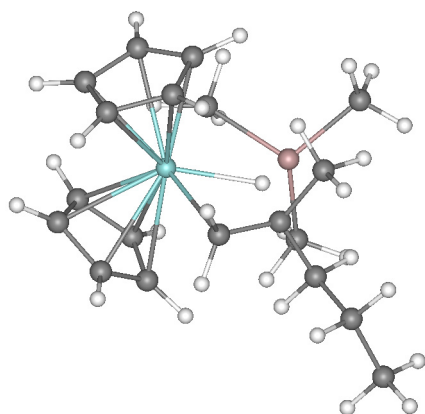

Zero-point vibrational energy

1658046.0 (Joules/Mol)

396.28251 (Kcal/Mol)

Zero-point correction

0.631516 (Hartree/Particle)

Thermal correction to Energy

0.664706

|                                             |              |
|---------------------------------------------|--------------|
| Thermal correction to Enthalpy              | 0.665650     |
| Thermal correction to Gibbs Free Energy     | 0.569894     |
| Sum of electronic and zero-point Energies   | -4761.108600 |
| Sum of electronic and thermal Energies      | -4761.075410 |
| Sum of electronic and thermal Enthalpies    | -4761.074466 |
| Sum of electronic and thermal Free Energies | -4761.170222 |

| cartesian |             |             |             |   |             |             |             |
|-----------|-------------|-------------|-------------|---|-------------|-------------|-------------|
| 6         | -1.71688437 | 2.62534785  | -0.09747748 | 6 | 1.92181563  | -1.32375216 | 0.60122252  |
| 6         | -1.98158431 | 2.50264788  | 1.29032254  | 6 | 1.57041574  | 2.10954785  | 0.72782254  |
| 6         | -3.33738446 | 2.14904785  | 1.45462251  | 1 | 2.18921566  | -1.54485214 | -0.44007745 |
| 6         | -3.93028426 | 2.07694793  | 0.15912253  | 6 | 3.23261571  | -1.21845210 | 1.41232252  |
| 6         | -2.93348432 | 2.39204788  | -0.79017746 | 1 | 1.36371565  | -2.20635223 | 0.95412254  |
| 1         | -3.08968425 | 2.47454786  | -1.85677755 | 6 | 2.18521571  | 2.72244787  | -0.54487753 |
| 1         | -0.76568437 | 2.90914798  | -0.53217745 | 1 | 0.88271558  | 2.83584785  | 1.18462253  |
| 1         | -1.26198435 | 2.64864779  | 2.08532262  | 1 | 2.39001560  | 2.01384783  | 1.46442246  |
| 1         | -3.84338427 | 1.99334788  | 2.39952254  | 6 | 4.06621552  | -2.49425220 | 1.26202250  |
| 1         | -4.97008419 | 1.86864781  | -0.05957748 | 6 | 2.96161556  | -0.93605202 | 2.89272261  |
| 6         | -3.39378428 | -1.20645213 | 2.13832259  | 1 | 3.82041550  | -0.38235211 | 1.01002252  |
| 6         | -4.46258450 | -0.75915205 | 1.33052254  | 6 | 3.16971564  | 1.75704789  | -1.21007752 |
| 6         | -4.33378410 | -1.35665214 | 0.05352252  | 6 | 2.87921572  | 4.05334806  | -0.23967749 |
| 6         | -3.21868443 | -2.23925209 | 0.10382252  | 1 | 1.37971568  | 2.93664789  | -1.26137745 |
| 6         | -2.62918425 | -2.13865209 | 1.37512255  | 1 | 3.58851576  | 2.17894793  | -2.12857747 |
| 1         | -1.76608431 | -2.69475222 | 1.71912253  | 1 | 2.70551562  | 0.79484791  | -1.46707749 |
| 1         | -3.22588444 | -0.94245213 | 3.17472267  | 1 | 4.00481558  | 1.54154789  | -0.53377748 |
| 1         | -5.23978424 | -0.06905209 | 1.63282251  | 1 | 5.02121544  | -2.41335225 | 1.78982246  |
| 1         | -5.00258446 | -1.21855211 | -0.78727746 | 1 | 4.27861547  | -2.70615220 | 0.20992252  |
| 1         | -2.88898444 | -2.89095211 | -0.69207752 | 1 | 3.52481556  | -3.35255218 | 1.67582250  |
| 40        | -2.32348442 | 0.16854790  | 0.30192250  | 1 | 3.88451576  | -0.95925206 | 3.47872257  |
| 6         | 0.02121562  | -1.33355212 | -2.41077733 | 1 | 2.28281569  | -1.68855214 | 3.31202269  |
| 6         | -0.89348435 | -0.14265209 | -2.16857743 | 1 | 2.51171565  | 0.05234791  | 3.05232263  |
| 6         | -2.30178452 | -0.30535209 | -2.10777736 | 1 | 3.29241562  | 4.50534821  | -1.14647746 |
| 1         | -0.47798437 | 0.09444790  | -0.67297745 | 1 | 3.70311546  | 3.89834785  | 0.46512252  |
| 1         | 1.05241561  | -1.03905213 | -2.18967748 | 1 | 2.18391562  | 4.76824808  | 0.20962253  |
| 6         | -0.30648437 | -2.64875221 | -1.71537745 | 1 | -0.96028435 | 2.00504804  | -2.58667731 |
| 1         | -2.90428448 | 0.45504791  | -2.59477735 | 1 | -0.33348435 | 0.96824795  | -3.86597729 |
| 1         | -2.67938447 | -1.31415212 | -2.23327732 | 1 | 0.68391562  | 1.32434785  | -2.46787739 |
| 6         | -0.55228436 | 0.00214791  | 2.25122261  | 6 | 0.74921560  | -3.71785212 | -2.00247741 |
| 1         | -0.39678437 | -1.02565217 | 2.58952260  | 1 | -1.27848434 | -3.01675224 | -2.05947733 |
| 1         | 0.22181565  | 0.60694790  | 2.76402259  | 1 | -0.38068438 | -2.48345208 | -0.63197744 |
| 1         | -1.44098437 | 0.37804788  | 2.76142263  | 1 | 0.49631560  | -4.65865183 | -1.50977755 |

|    |             |             |             |   |            |             |             |
|----|-------------|-------------|-------------|---|------------|-------------|-------------|
| 1  | -0.01828438 | -1.48585212 | -3.49907732 | 1 | 1.73431563 | -3.40675211 | -1.64467752 |
| 6  | -0.34338436 | 1.12854791  | -2.78177738 | 1 | 0.82431567 | -3.91125202 | -3.07617736 |
| 13 | 0.80521560  | 0.29144791  | 0.71902251  |   |            |             |             |

## I-5Me

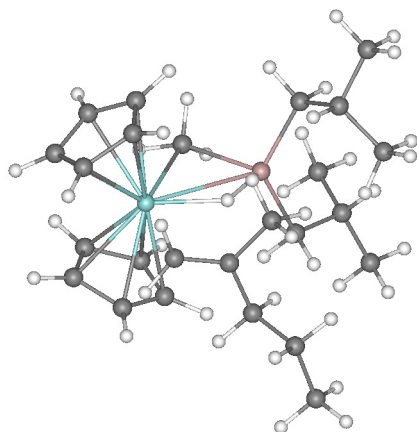

|                                             |                             |
|---------------------------------------------|-----------------------------|
| Zero-point vibrational energy               | 1658285.3 (Joules/Mol)      |
|                                             | 396.33969 (Kcal/Mol)        |
| Zero-point correction                       | 0.631608 (Hartree/Particle) |
| Thermal correction to Energy                | 0.666340                    |
| Thermal correction to Enthalpy              | 0.667284                    |
| Thermal correction to Gibbs Free Energy     | 0.565558                    |
| Sum of electronic and zero-point Energies   | -4761.121319                |
| Sum of electronic and thermal Energies      | -4761.086587                |
| Sum of electronic and thermal Enthalpies    | -4761.085643                |
| Sum of electronic and thermal Free Energies | -4761.187368                |

| cartesian |            |             |             |   |             |             |             |
|-----------|------------|-------------|-------------|---|-------------|-------------|-------------|
| 6         | 2.92140126 | 1.48615634  | 1.66519439  | 1 | 3.09070134  | 2.35915637  | -0.86220562 |
| 6         | 3.88130140 | 0.47635639  | 1.88119447  | 1 | 2.81860137  | 1.36025643  | -2.38850570 |
| 6         | 3.23360133 | -0.60424364 | 2.54689431  | 1 | -0.83129871 | 1.25335646  | -2.11930561 |
| 6         | 1.88140130 | -0.23524362 | 2.75529432  | 1 | -0.02799869 | 2.36055636  | -3.23070550 |
| 6         | 1.67200136 | 1.03885639  | 2.17809439  | 1 | 0.57400131  | 0.70625639  | -3.06700563 |
| 1         | 0.74170136 | 1.59385645  | 2.18679452  | 6 | -0.23399866 | 4.16235638  | -0.98350567 |
| 1         | 3.11620140 | 2.45315623  | 1.22389436  | 1 | -0.34249866 | 2.32995629  | 0.14689437  |
| 1         | 4.93000126 | 0.53025639  | 1.61679447  | 1 | 1.17430139  | 3.22375631  | 0.35659435  |
| 1         | 3.70650125 | -1.52004361 | 2.88209438  | 1 | -0.02299869 | -2.45954370 | 1.90799439  |
| 1         | 1.12850142 | -0.83034360 | 3.25549436  | 1 | 1.64290130  | -2.64524364 | 1.71269441  |
| 6         | 2.91060138 | -1.26544356 | -2.07600570 | 1 | 0.59880131  | -3.27294374 | 0.46799436  |
| 6         | 4.08740139 | -0.81834358 | -1.40570557 | 6 | -0.80119860 | 5.06615639  | 0.10959436  |
| 6         | 4.37000132 | -1.74214363 | -0.37030566 | 1 | -1.03639865 | 3.86245608  | -1.66390562 |

---

|    |             |             |             |   |             |             |             |
|----|-------------|-------------|-------------|---|-------------|-------------|-------------|
| 6  | 3.35220122  | -2.72254372 | -0.36500564 | 1 | 0.50490135  | 4.70885658  | -1.57900560 |
| 6  | 2.45510149  | -2.43134379 | -1.43220556 | 1 | -1.27549863 | 5.94955635  | -0.32190564 |
| 1  | 1.57600141  | -3.00084376 | -1.70630562 | 1 | -0.01399869 | 5.40695667  | 0.78799433  |
| 1  | 2.44480133  | -0.80454361 | -2.93750548 | 1 | -1.55349874 | 4.53785658  | 0.70269436  |
| 1  | 4.69510126  | 0.03745639  | -1.67290556 | 6 | -2.85859871 | -2.34434366 | -3.30560565 |
| 1  | 5.21600151  | -1.70344365 | 0.30409437  | 1 | -1.33429861 | -0.93444359 | -2.80170560 |
| 1  | 3.28970122  | -3.57054377 | 0.30479437  | 6 | -3.16039872 | -0.32044363 | -1.85560560 |
| 40 | 2.23300123  | -0.53654361 | 0.25699437  | 6 | -3.80119848 | 0.19635640  | 3.08059430  |
| 6  | 0.75330132  | -2.40904379 | 1.12199438  | 6 | -2.88449860 | -2.10234356 | 2.64829445  |
| 1  | 0.43830132  | -0.10204361 | -0.40320563 | 1 | -3.67939854 | -0.76864362 | 1.17259443  |
| 13 | -0.75629866 | -1.12344360 | 0.30529436  | 1 | -3.83789873 | -2.52404380 | 2.97879434  |
| 6  | -1.64239860 | -2.19944382 | -1.08160555 | 1 | -2.21489859 | -2.08344364 | 3.51759434  |
| 6  | -1.69899869 | -0.08174361 | 1.68429446  | 1 | -2.46579862 | -2.80014372 | 1.91139436  |
| 6  | -2.18249869 | -1.41474354 | -2.29370570 | 1 | -4.78469849 | -0.21334362 | 3.32999444  |
| 1  | -0.97419870 | -2.99664378 | -1.43860555 | 1 | -3.94599867 | 1.20455635  | 2.68179440  |
| 1  | -2.48829865 | -2.72724366 | -0.61180562 | 1 | -3.22659874 | 0.28085637  | 4.00999451  |
| 6  | -3.06119871 | -0.69234359 | 2.07759452  | 1 | -3.51119852 | 0.27045637  | -2.70750570 |
| 1  | -1.09239864 | 0.02165639  | 2.59899449  | 1 | -2.71729875 | 0.37495643  | -1.12830555 |
| 1  | -1.86409855 | 0.94775641  | 1.32979441  | 1 | -4.03979874 | -0.76654363 | -1.37690556 |
| 6  | 2.39690137  | 1.82465637  | -1.50290561 | 1 | -3.22179866 | -1.79204357 | -4.17800570 |
| 6  | 1.05980134  | 2.04235625  | -1.43340564 | 1 | -3.71529865 | -2.84674382 | -2.84380555 |
| 6  | 0.14420134  | 1.54625642  | -2.51760554 | 1 | -2.16799855 | -3.11654377 | -3.65670562 |
| 6  | 0.42820132  | 2.90965629  | -0.38010564 |   |             |             |             |

---

## S1.9. Interaction with H<sub>2</sub>

### H2 Hydrogen

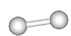

|                                             |                             |
|---------------------------------------------|-----------------------------|
| Zero-point vibrational energy               | 27227.7 (Joules/Mol)        |
|                                             | 6.50757 (Kcal/Mol)          |
| Zero-point correction                       | 0.010370 (Hartree/Particle) |
| Thermal correction to Energy                | 0.012731                    |
| Thermal correction to Enthalpy              | 0.013675                    |
| Thermal correction to Gibbs Free Energy     | -0.001099                   |
| Sum of electronic and zero-point Energies   | -1.153736                   |
| Sum of electronic and thermal Energies      | -1.151375                   |
| Sum of electronic and thermal Enthalpies    | -1.150431                   |
| Sum of electronic and thermal Free Energies | -1.165205                   |

cartesian

|   |            |            |            |   |            |            |             |
|---|------------|------------|------------|---|------------|------------|-------------|
| 1 | 0.00000000 | 0.00000000 | 0.36780000 | 1 | 0.00000000 | 0.00000000 | -0.36780000 |
|---|------------|------------|------------|---|------------|------------|-------------|

### \_I-2H\_a\_H2

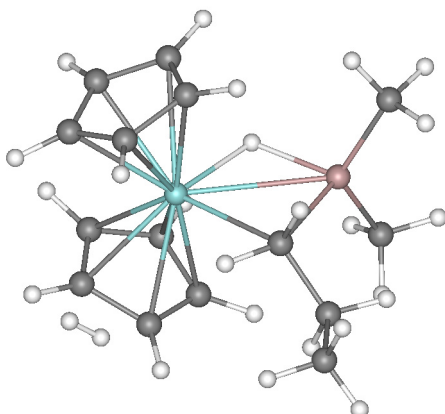

|                                              |                             |
|----------------------------------------------|-----------------------------|
| Zero-point vibrational energy                | 945988.3 (Joules/Mol)       |
|                                              | 226.09663 (Kcal/Mol)        |
| Zero-point correction=                       | 0.360308 (Hartree/Particle) |
| Thermal correction to Energy=                | 0.382778                    |
| Thermal correction to Enthalpy=              | 0.383723                    |
| Thermal correction to Gibbs Free Energy=     | 0.310018                    |
| Sum of electronic and zero-point Energies=   | -4369.628294                |
| Sum of electronic and thermal Energies=      | -4369.605823                |
| Sum of electronic and thermal Enthalpies=    | -4369.604879                |
| Sum of electronic and thermal Free Energies= | -4369.678583                |

cartesian

|    |             |             |             |   |             |             |             |
|----|-------------|-------------|-------------|---|-------------|-------------|-------------|
| 6  | -0.12040000 | -2.23469996 | -0.91839999 | 6 | -2.94689989 | -0.58560002 | -2.05620003 |
| 6  | 0.52300000  | -2.49469995 | 0.31639999  | 1 | -1.71469998 | 3.30730009  | -0.55430001 |
| 6  | 1.89900005  | -2.17490005 | 0.17600000  | 1 | -2.94129992 | 3.02080011  | -1.78310001 |
| 6  | 2.10780001  | -1.73529994 | -1.16159999 | 1 | -3.32150006 | 2.75399995  | -0.09400000 |
| 6  | 0.86240000  | -1.77230000 | -1.83650005 | 1 | -2.33929992 | -0.97399998 | -2.88229990 |
| 1  | 0.68629998  | -1.50689995 | -2.87159991 | 1 | -3.28870010 | -1.44780004 | -1.47370005 |
| 1  | -1.16910005 | -2.38910007 | -1.14069998 | 1 | -3.84170008 | -0.14760000 | -2.51200008 |
| 1  | 0.04660000  | -2.87540007 | 1.21340001  | 6 | -2.85540009 | -0.97350001 | 2.81669998  |
| 1  | 3.05819988  | -1.44760001 | -1.59340000 | 6 | -1.42780006 | 0.16270000  | 1.03869998  |
| 6  | 0.93199998  | 2.34240007  | 0.77609998  | 6 | -2.61400008 | -0.78369999 | 1.31710005  |
| 6  | 1.73899996  | 1.53269994  | 1.61940002  | 1 | -3.52800012 | -0.37880000 | 0.86309999  |
| 6  | 2.79200006  | 0.99519998  | 0.83829999  | 1 | -1.64129996 | 1.13360000  | 1.50619996  |
| 6  | 2.63949990  | 1.47780001  | -0.49140000 | 1 | -0.60140002 | -0.22849999 | 1.69760001  |
| 6  | 1.49880004  | 2.32170010  | -0.52420002 | 1 | -2.44619989 | -1.75370002 | 0.83710003  |
| 1  | 1.12860000  | 2.85960007  | -1.38759995 | 1 | -1.98210001 | -1.42719996 | 3.29679990  |
| 1  | 0.05810000  | 2.90540004  | 1.08000004  | 1 | -3.04859996 | -0.01550000 | 3.30609989  |
| 1  | 1.58140004  | 1.36259997  | 2.67860007  | 1 | 3.58960009  | 0.35609999  | 1.19700003  |
| 1  | 3.30110002  | 1.27260005  | -1.32379997 | 1 | 2.66090012  | -2.29320002 | 0.93680000  |
| 40 | 0.69550002  | -0.01320000 | -0.05690000 | 1 | -3.71320009 | -1.62530005 | 2.99519992  |
| 1  | -0.29290000 | 0.68250000  | -1.54980004 | 1 | 1.72679996  | -1.33060002 | 3.55399990  |
| 13 | -1.99269998 | 0.77300000  | -1.02760005 | 1 | 1.12179995  | -1.61360002 | 3.24130011  |
| 6  | -2.52979994 | 2.63569999  | -0.84410000 |   |             |             |             |

## S1.10. Transition states search and proof

As was mentioned in the main article, transition states were found by draft scanning using Priroda program [48] followed by presize scanning with sequential changing of key geometric parameters with a step of 0.01 Å and then by Berny optimization using Gaussian-09 program package [36]. Verification of the geometries of the transition states was performed using the standard IRC procedure as implemented in Gaussian-09 with the command line:

```
# irc=(maxpoints=20,calcf).
```

Note that in some cases the IRC sequences included one artifact point (see Fig. 1a for example), and IRC procedures were repeated in duplicative mode for reverse and forward directions. In view of the visibility of the IRC procedure for the confirmation of the TS identity, we attached animation files named \*\_IRC.gif to the SI data in addition to animation files that reflect the imaginary frequency vibration for all transition states mentioned in the manuscript.

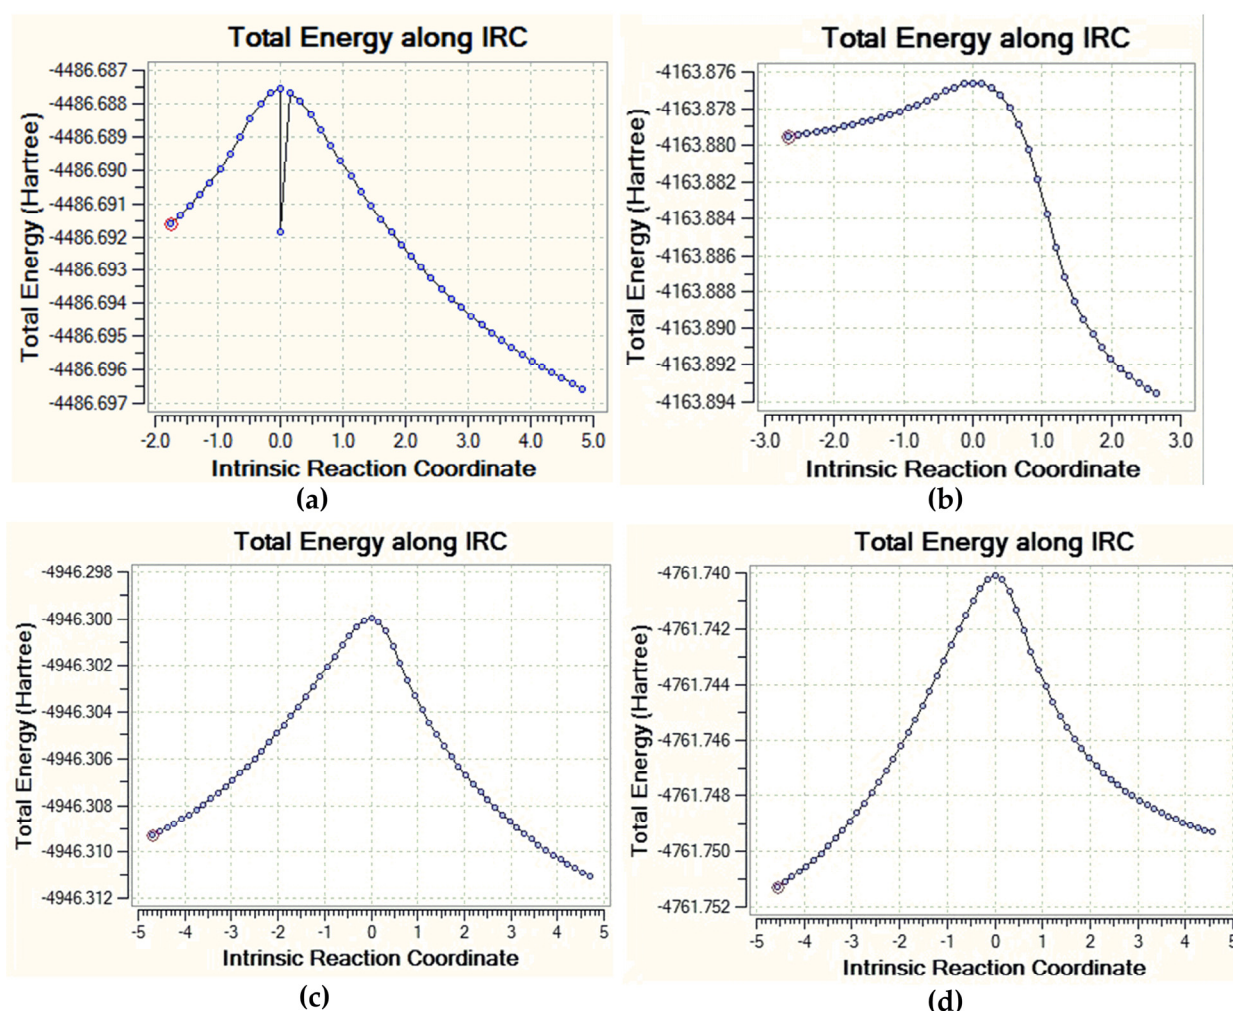

**Figure S2.** IRC plots (GaussView) for transition states: (a) TS-4H (one artifact point); (b) TS-4-; (c) TS-4Cl; (d) TS-4Me\_dibu. Animations for (b–d) can be found in the Supporting Information as \*\_IRC.gif.

## S2. Oligomerization experiments

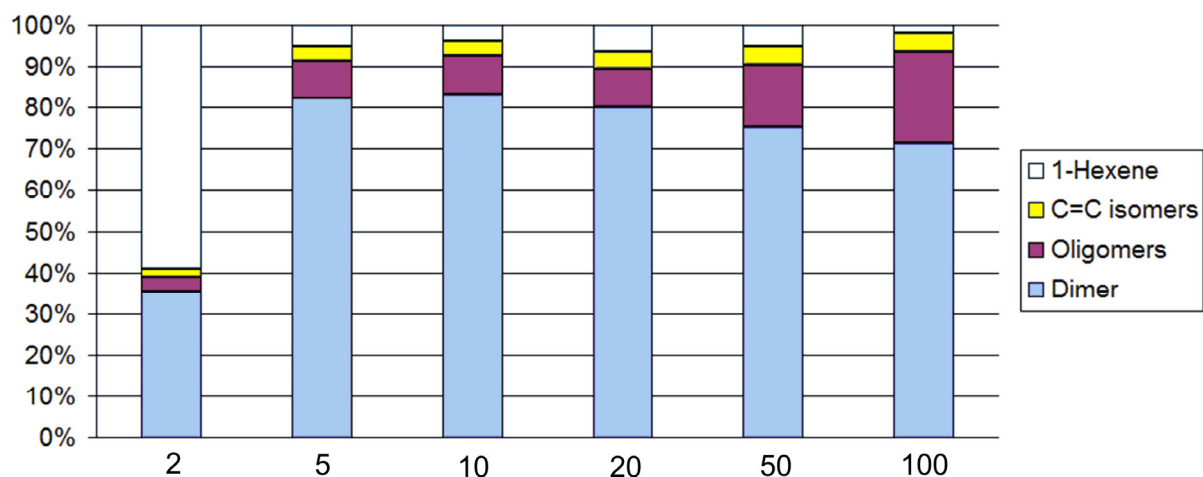

**Figure S2.** The dependence of the composition of the reaction mixtures (1-hexene oligomerization in bulk, 60 °C, 4 h) from Al<sub>MMAO-12</sub>/Zr ratio.

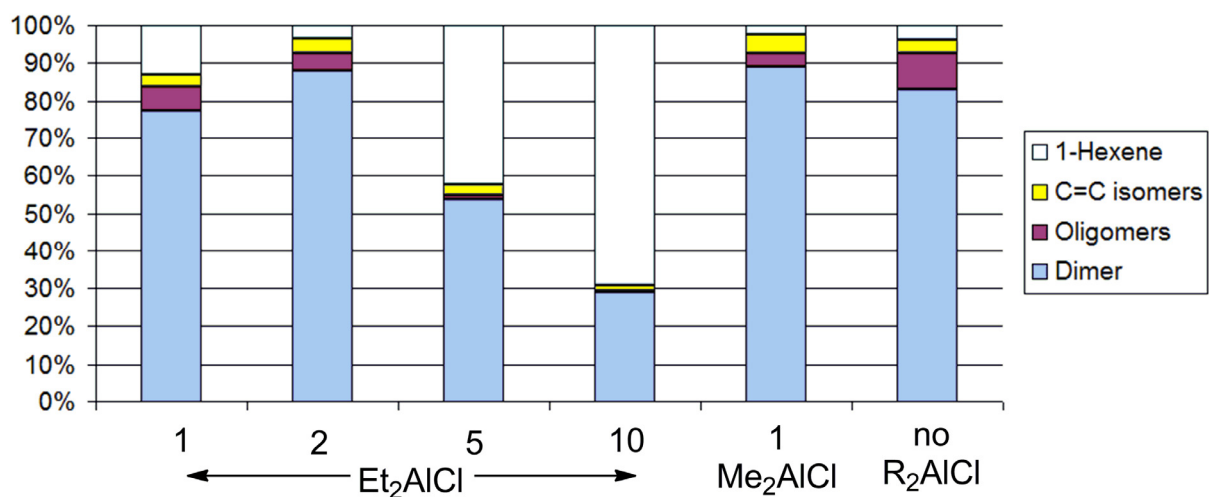

**Figure S3.** The affect of R<sub>3</sub>AlCl on the composition of the reaction mixtures (1-hexene oligomerization in bulk, 60 °C, 4 h, Al<sub>MMAO-12</sub>/Zr = 10).
